# Supplementary material for: Ligand-free Pd-catalysed decarboxylative arylation of imidazo[1,2-a]pyridine-3-carboxylic acids with aryl bromides
Source: Royal Society of Chemistry journal article supplement (doi:10.1039/c6ra12166g), 2016-01-01
Supplement: c6ra12166g1.pdf [file c6ra12166g1.pdf]

## Supporting Information

### Ligand-free Pd-catalysed decarboxylative arylation of Imidazo[1,2-a]pyridine-3-carboxylic acids with Aryl bromides†

Uttam B. Karale<sup>a,b</sup>, Saradhi Kalari<sup>a</sup>, Jala Shivakumar<sup>c</sup>, Vitthal B. Makane<sup>a,b</sup>, Dattatraya A. Babar<sup>a,b</sup>, Ritesh P. Thakare<sup>d</sup>, Bathini Nagendra Babu<sup>c</sup>, Sidharth Chopra<sup>d</sup>, Haridas B. Rode<sup>a, b\*</sup>

<sup>a</sup> Department of Natural Product Chemistry, CSIR-Indian Institute of Chemical Technology, Tarnaka, Hyderabad-500007, India

<sup>b</sup>Academy of Scientific and Innovative Research (AcSIR), New Delhi, India

<sup>c</sup>Department of Medicinal Chemistry, National Institute of Pharmaceutical Education and Research, Balanagar, Hyderabad - 500 037, India

<sup>d</sup>Micobiology Division, Central Drug Research Institute, Lucknow - 226 031, India

CORRESPONDING AUTHOR'S E-MAIL ADDRESS

*haridas.rode@iict.res.in*

## **Table of Contents**

|                                                               |            |
|---------------------------------------------------------------|------------|
| Materials and Methods                                         | <b>S3</b>  |
| Bromides used in the study                                    | <b>S4</b>  |
| Chlorides used in the study                                   | <b>S5</b>  |
| Synthesis of starting materials                               | <b>S6</b>  |
| $^1\text{H}$ and $^{13}\text{C}$ NMR spectra of the compounds | <b>S10</b> |
| Antibacterial assay                                           | <b>S68</b> |
| References                                                    | <b>S68</b> |

## Materials and Methods

$^1\text{H}$  and  $^{13}\text{C}$  NMR spectra were recorded on a Bruker Avance 300 or 400 or 500 spectrometer and are referred to the residual solvent signal: dimethylsulfoxide- $\text{d}_6$  (2.50) for  $^1\text{H}$  and (39.52) for  $^{13}\text{C}$ ;  $\text{CDCl}_3$ : (7.26) for  $^1\text{H}$  and (77.16) for  $^{13}\text{C}$ . Chemical shifts ( $\delta$ ) are given in ppm and coupling constants (J) were measured in Hz. The following abbreviations are used; s-singlet, d-doublet, dd-doublet of doublet, t-triplet, td-triplet of doublet, dt-doublet of triplet, q-quartet, qd-quartet of doublet, qn-quintet, br-broad. ESI- and HR ESI-MS were recorded using Finnigan MAT 1020B and Thermo Scientific Q Exactive hybrid quadrupole-Orbitrap mass; values are given in m/z. Column chromatography was carried out using silica gel (60–120 mesh) packed in glass columns. Analytical TLC was carried out on Macherey-Nagel 60 F245 aluminium-backed silica gel plates. Melting point of compound was measured on Stuart melting point apparatus SMP3. Anhydrous solvents and chemical materials were purchased from commercial sources.

## Bromides used in the study

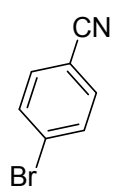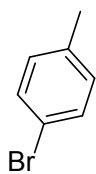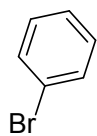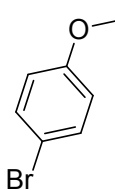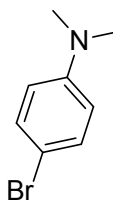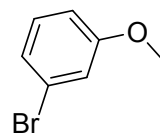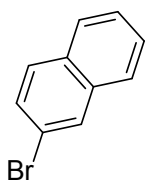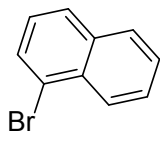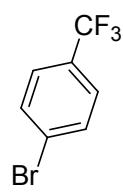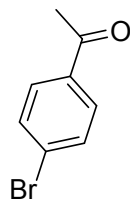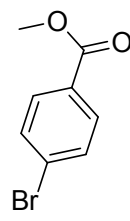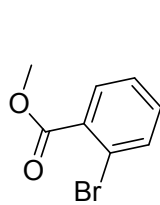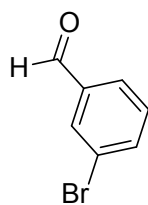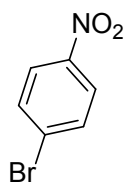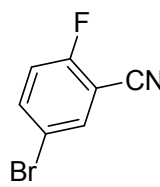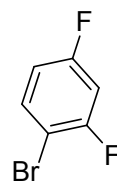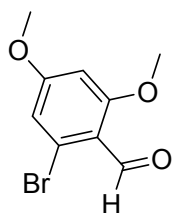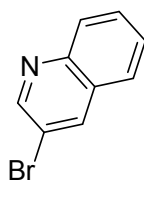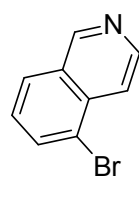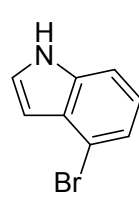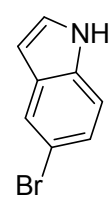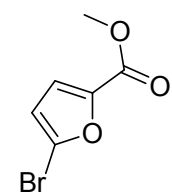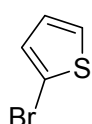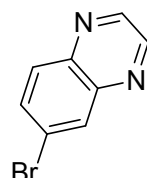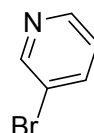

## Chlorides used in the study

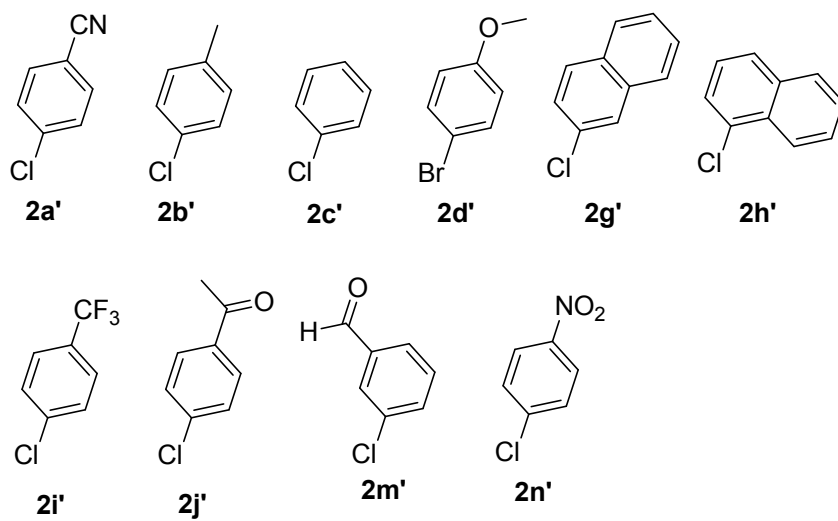

## Synthesis of starting materials

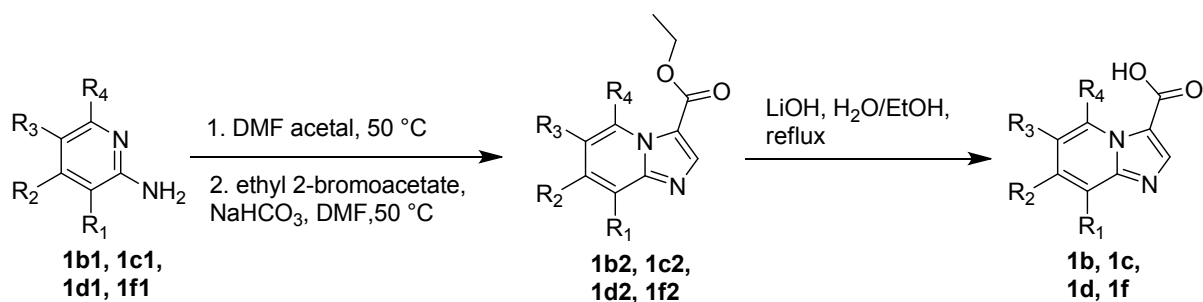

| No.               | R <sub>1</sub>  | R <sub>2</sub>  | R <sub>3</sub>  | R <sub>4</sub> | ester synthesis reaction time (h) |         | ester hydrolysis reaction time (h) |
|-------------------|-----------------|-----------------|-----------------|----------------|-----------------------------------|---------|------------------------------------|
|                   |                 |                 |                 |                | stage 1                           | stage 2 |                                    |
| <b>1b1/1b2/1b</b> | H               | H               | CH <sub>3</sub> | H              | 4                                 | 12      | 12                                 |
| <b>1c1/1c2/1c</b> | H               | CH <sub>3</sub> | H               | H              | 24                                | 12      | 12                                 |
| <b>1d1/1d2/1d</b> | CH <sub>3</sub> | H               | H               | H              | 7                                 | 15      | 24                                 |
| <b>1f1/1f2/1f</b> | H               | H               | Cl              | H              | 8                                 | 12      | 72                                 |

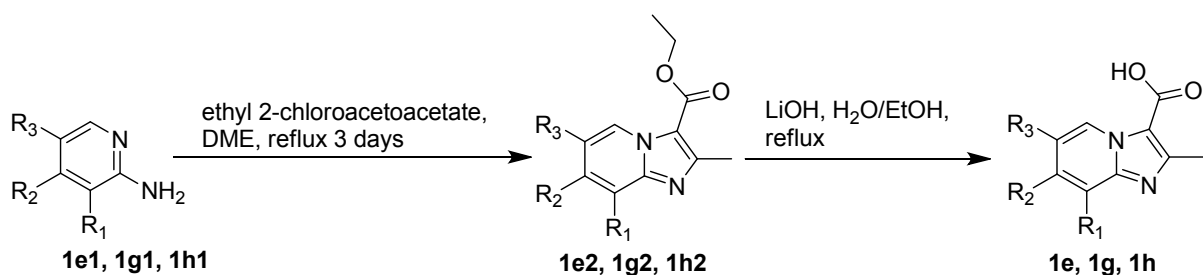

| No.               | R <sub>1</sub>  | R <sub>2</sub>  | R <sub>3</sub> | ester hydrolysis reaction time (h) |
|-------------------|-----------------|-----------------|----------------|------------------------------------|
| <b>1e1/1e2/1e</b> | H               | CH <sub>3</sub> | H              | 24                                 |
| <b>1g1/1g2/1g</b> | H               | H               | Cl             | 48                                 |
| <b>1h1/1h2/1h</b> | CF <sub>3</sub> | H               | H              | 36                                 |

Imidazo[1,2-*a*]pyridine-3-carboxylic acids **1b-1h** were synthesized using reporting procedure or modification thereof.<sup>1</sup> Below is the brief description of their preparation and analysis.

## Synthesis of **1b**, **1c**, **1d**, **1f**

### 6-methylimidazo[1,2-*a*]pyridine-3-carboxylic acid (**1b**)

5-Methylpyridin-2-amine **1b1** (5g, 46.23 mmol) and *N,N*-dimethyl formamide dimethyl acetal (30 mL) were stirred at 50 °C for 4 hrs. Upon completion, reaction mixture was evaporated on rotary evaporator and dried. The dried residue, ethyl 2-bromoacetate (11.50 g, 69.29 mmol) and NaHCO<sub>3</sub> (5.8 gm, 69.04 mmol) in DMF (30 mL) were stirred at 50 °C. The progress of reaction was monitored by TLC. After 15 hrs the reaction mixture was added in water (200 mL) and extracted with ethyl acetate (2x150 mL). The combined organic phase was separated, washed with water (100 mL), brine (100 mL) and dried with sodium sulphate. The organic solvent was evaporated on rotary evaporator and crude material obtained was purified using silica gel column chromatography with 20% ethyl acetate in hexane. **1b2** was obtained as green liquid (5g, 53% yield). <sup>1</sup>H NMR (400 MHz, CDCl<sub>3</sub>): δ 9.11 (s, 1H), 8.25 (s, 1H), 7.66 (d, *J* = 9.1 Hz, 1H), 7.27 (dd, *J* = 9.1, 1.7 Hz, 1H), 4.41 (q, *J* = 7.1 Hz, 2H), 2.41 (s, 3H), 1.42 (t, *J* = 7.1 Hz, 3H); <sup>13</sup>C NMR (100 MHz, CDCl<sub>3</sub>): δ 160.6, 147.1, 140.8, 130.5, 125.4, 124.2, 116.8, 115.4, 60.3, 18.3, 14.4; HRMS (ESI-MS): Calc. for C<sub>11</sub>H<sub>13</sub>N<sub>2</sub>O<sub>2</sub> [(M+H)<sup>+</sup>]: 205.0972, Found: 205.0976.

**1b2**(2g, 9.8 mmol) was dissolved in ethanol (24 mL) and 20 mL of LiOH (1 N aq. solution, 19.6 mmol) was added drop wise. The resulting reaction mixture was refluxed for 12 hrs. Ethanol was then removed on rotary evaporator and resulting mixture was cooled at ice bath temperature. The 4N HCl was added drop wise till the P<sup>H</sup> of reaction mixture became ≈ 4. The precipitated solid was filtered off and dried to furnish **1b<sup>2</sup>** as white solid (1.2 gm, 91 % yield). mp= 188-190°C; <sup>1</sup>H NMR (400 MHz, DMSO-*d*<sub>6</sub>): δ 9.07 (s, 1H), 8.18 (s, 1H), 7.68 (d, *J* = 9.1 Hz, 1H), 7.40 (dd, *J* = 9.1, 1.7 Hz, 1H), 2.37 (s, 3H); <sup>13</sup>C NMR (100 MHz, DMSO-*d*<sub>6</sub>): δ 161.4, 146.8, 140.8, 130.7, 125.0, 124.1, 116.8, 115.6, 17.9; HRMS (ESI-MS): Calc. for C<sub>9</sub>H<sub>9</sub>N<sub>2</sub>O<sub>2</sub> [(M+H)<sup>+</sup>]: 177.0659, Found: 177.0667.

In an analogous way **1c**, **1d**, **1f** were synthesized.

**1c<sup>2</sup>**: Obtained 6.19 g (65%) **1c2** as white solid from 5.0g of **1c1**. mp= 72-74°C; <sup>1</sup>H NMR (400 MHz, CDCl<sub>3</sub>): δ 9.15-9.09 (m, 1H), 8.24-8.17 (m, 1H), 7.46 (s, 1H), 6.84 (d, *J* = 6.8 Hz, 1H), 4.42-4.33 (m, 2H), 2.43 (s, 3H), 1.40-1.32 (m, 3H); <sup>13</sup>C NMR (125 MHz, CDCl<sub>3</sub>): δ 160.6, 148.8, 141.4, 138.7, 126.6, 116.6, 116.3, 115.3, 60.2, 21.3, 14.4; HRMS (ESI-MS): Calc. for C<sub>11</sub>H<sub>13</sub>N<sub>2</sub>O<sub>2</sub> [(M+H)<sup>+</sup>]: 205.09715, Found: 205.09837.

**1c<sup>2</sup>**: Obtained 0.64 g (74%) **1c** as white solid from 1.0g of **1c2**. mp= 189-192°C; <sup>1</sup>H NMR (400 MHz, DMSO-*d*<sub>6</sub>): δ 9.16 (d, *J* = 7.0 Hz, 1H), 8.13 (s, 1H), 7.55 (s, 1H), 7.04 (dd, *J* = 7.0, 1.5 Hz, 1H), 2.42 (s, 3H); <sup>13</sup>C NMR (125 MHz, DMSO-*d*<sub>6</sub>): δ 161.4, 148.1, 140.9, 138.6, 126.6, 116.8, 115.9, 115.6, 20.7; HRMS (ESI-MS): Calc. for C<sub>9</sub>H<sub>9</sub>N<sub>2</sub>O<sub>2</sub> [(M+H)<sup>+</sup>]: 177.0659, Found: 177.0667.

**1d<sup>2</sup>**: Obtained 3.25 g (34%) **1d2** as red solid from 5.0g of **1d1**. mp= 72-74°C; <sup>1</sup>H NMR (400 MHz, CDCl<sub>3</sub>) δ 9.13 (d, *J* = 7.0 Hz, 1H), 8.25 (s, 1H), 7.19-7.15 (m, 1H), 6.91 (t, *J* = 7.0 Hz, 1H), 4.38 (q, *J* = 7.1 Hz, 2H), 2.63 (s, 3H), 1.39 (t, *J* = 7.1 Hz, 3H); <sup>13</sup>C NMR (125 MHz,

CDCl<sub>3</sub>):  $\delta$  160.8, 148.7, 140.8, 127.7, 126.5, 125.5, 116.3, 114.3, 60.5, 17.0, 14.6; HRMS (ESI-MS):Calc. for C<sub>11</sub>H<sub>13</sub>N<sub>2</sub>O<sub>2</sub> [(M+H)<sup>+</sup>]: 205.0972, Found: 205.0977.

**1d**: Obtained 0.65 g (49%) **1d** as violet solid from 1.5 g of **1d2**. mp= 184-185°C; <sup>1</sup>H NMR (400 MHz, DMSO-d<sub>6</sub>):  $\delta$  9.20 (d, *J* = 7.0 Hz, 1H), 8.44 (s, 1H), 7.54 (d, *J* = 7.1 Hz, 1H), 7.27 (t, *J* = 7.0 Hz, 1H), 2.59 (s, 3H); <sup>13</sup>C NMR (75 MHz, DMSO-d<sub>6</sub>):  $\delta$  160.8, 144.9, 135.5, 129.9, 125.8, 125.5, 117.0, 116.4, 16.5; HRMS (ESI-MS):Calc. for C<sub>9</sub>H<sub>9</sub>N<sub>2</sub>O<sub>2</sub> [(M+H)<sup>+</sup>]: 177.06585, Found: 177.06720.

**1f2**<sup>1c</sup>: Obtained 5.5 g (63%) **1f2** as yellow semisolid from 5.0g of **1f1**. <sup>1</sup>H NMR (400 MHz, CDCl<sub>3</sub>)  $\delta$  9.39 (dd, *J* = 2.0, 0.8 Hz, 1H), 8.29 (s, 1H), 7.68 (dd, *J* = 9.5, 0.8 Hz, 1H), 7.39 (dd, *J* = 9.5, 2.0 Hz, 1H), 4.43 (q, *J* = 7.1 Hz, 2H), 1.42 (t, *J* = 7.1 Hz, 3H); <sup>13</sup>C NMR (125 MHz, CDCl<sub>3</sub>):  $\delta$  160.5, 146.8, 141.9, 129.0, 125.9, 122.9, 118.2, 116.4, 60.9, 14.6; HRMS (ESI-MS):Calc. for C<sub>10</sub>H<sub>10</sub>ClN<sub>2</sub>O<sub>2</sub> [(M+H)<sup>+</sup>]: 225.0425, Found: 225.0428.

**1f1**<sup>1c</sup>: Obtained 0.72 g (54%) **1f1** as violet solid from 1.5 g of **1f2**. mp= 206°C; <sup>1</sup>H NMR (400 MHz, DMSO-d<sub>6</sub>):  $\delta$  9.31 (dd, *J* = 2.0, 0.6 Hz, 1H), 8.27 (s, 1H), 7.84 (dd, *J* = 9.5, 0.6 Hz, 1H), 7.62 (dd, *J* = 9.5, 2.0 Hz, 1H); <sup>13</sup>C NMR (100 MHz, DMSO-d<sub>6</sub>): 160.1, 140.2, 127.4, 126.8, 124.0, 120.3, 117.8, 117.2; HRMS (ESI-MS):Calc. for C<sub>8</sub>H<sub>6</sub>ClN<sub>2</sub>O<sub>2</sub> [(M+H)<sup>+</sup>]: 197.01123, Found: 197.01253.

### Synthesis of **1e**, **1g**, **1h**

Ethyl-2-chloroacetoacetate (7.93 g, 45.8 mmol) and 2-Amino-4-picoline (10.0 g, 91.5 mmol) were dissolved in 95 mL of 1,2-dimethoxyethane (DME) and heated for 48 hrs at reflux. The reaction mixture was cooled and solid (2-amino-4-picoline hydrochloride salt) was collected and washed with hexane. The filtrate was concentrated in vacuo and resulting residue was dissolved in dichloromethane (200 mL) and washed with 5% acetic acid solution (2x 50 mL) and brine. The organic phase was dried with sodium sulfate, filtered and concentrated in vacuo. Crude product was purified by silica gel with 22% ethyl acetate in hexane to furnish 7.0 g (34%) of ethyl 2,7-dimethylimidazo[1,2-*a*]pyridine-3-carboxylate (**1e2**)<sup>1a</sup> as a yellowish solid. mp= 66°C; <sup>1</sup>H NMR (500 MHz, CDCl<sub>3</sub>):  $\delta$  9.12 (d, *J* = 7.1 Hz, 1H), 7.35 (s, 1H), 6.76 (dd, *J* = 7.1, 1.2 Hz, 1H), 4.38 (q, *J* = 7.1 Hz, 2H), 2.66 (s, 3H), 2.40 (s, 3H), 1.40 (t, *J* = 7.1 Hz, 3H); <sup>13</sup>C NMR (125 MHz, CDCl<sub>3</sub>):  $\delta$  161.4, 152.6, 147.2, 139.1, 127.1, 116.1, 115.3, 112.1, 60.2, 21.3, 16.5, 14.5; HRMS (ESI-MS):Calc. for C<sub>12</sub>H<sub>15</sub>N<sub>2</sub>O<sub>2</sub> [(M+H)<sup>+</sup>]: 219.11280, Found: 219.11397.

**1e2** (4.0 g, 18.34 mmol) was dissolved in 55 mL ethanol and 37 mL of 1 N LiOH solution (36.58 mmol) was added. The reaction mixture was refluxed for 48 hrs. Once complete, ethanol was removed on rotary evaporator and resulting mixture was cooled at ice bath temperature. The 4N HCl was added drop wise till the pH of reaction mixture became  $\approx$  4. The precipitated solid was filtered off and dried under vacuum to furnish **1e**<sup>1a</sup> as white solid (2.6 gm, 78 % yield). mp= 216-218°C; <sup>1</sup>H NMR (400 MHz, DMSO-d<sub>6</sub>):  $\delta$  9.33 (d, *J* = 7.1 Hz, 1H), 7.79 (s, 1H), 7.45 (dd, *J* = 7.1, 1.5 Hz, 1H), 2.71 (s, 3H), 2.55 (s, 3H); <sup>13</sup>C NMR (75 MHz, DMSO-d<sub>6</sub>):  $\delta$  160.9, 146.4, 141.9, 140.0, 128.4, 120.1, 113.3, 110.8, 21.0, 12.3; HRMS (ESI-MS):Calc. for C<sub>10</sub>H<sub>11</sub>N<sub>2</sub>O<sub>2</sub> [(M+H)<sup>+</sup>]: 191.08150, Found: 191.08264.



In an analogous way **1g** and **1h** were synthesized.

**1g2<sup>1c</sup>**: Obtained 4.0 g (43%) **1g2** as yellow solid from 10.0 g of **1g1**. mp= 102-104°C; <sup>1</sup>H NMR (500 MHz, CDCl<sub>3</sub>): δ 9.40 (dd, *J* = 2.0, 0.7 Hz, 1H), 7.56 (d, *J* = 9.3 Hz, 1H), 7.35 (dd, *J* = 9.3, 2.0 Hz, 1H), 4.44 (q, *J* = 7.1 Hz, 2H), 2.71 (s, 3H), 1.44 (t, *J* = 7.1 Hz, 3H); <sup>13</sup>C NMR (125 MHz, CDCl<sub>3</sub>): δ 161.3, 153.3, 145.2, 128.9, 126.1, 122.1, 117.0, 113.2, 60.7, 16.7, 14.6; HRMS (ESI-MS): Calc. for C<sub>11</sub>H<sub>12</sub>ClN<sub>2</sub>O<sub>2</sub> [(M+H)<sup>+</sup>]: 239.05818, Found: 239.05941.

**1g1<sup>c</sup>**: Obtained 1.5g (68%) **1g** as white solid from 1.0 g of **1g2**. mp= 158-160°C; <sup>1</sup>H NMR (400 MHz, DMSO-d<sub>6</sub>): δ 9.31 (dd, *J* = 2.1, 0.6 Hz, 1H), 7.71 (dd, *J* = 9.5, 0.6 Hz, 1H), 7.59 (dd, *J* = 9.5, 2.1 Hz, 1H), 2.59 (s, 3H); <sup>13</sup>C NMR (75 MHz, DMSO-d<sub>6</sub>) δ 161.9, 151.7, 144.2, 128.7, 125.4, 120.8, 117.0, 113.1, 15.9; HRMS (ESI-MS): Calc. for C<sub>9</sub>H<sub>8</sub>ClN<sub>2</sub>O<sub>2</sub> [(M+H)<sup>+</sup>]: 211.02688, Found: 211.02825.

**1h2**: Obtained 0.72 g (45%) **1h2** as yellow solid from 1.0 g of **1h1**. mp= 88-90°C; <sup>1</sup>H NMR (500 MHz, CDCl<sub>3</sub>): δ 9.51 (d, *J* = 7.0 Hz, 1H), 7.70 (d, *J* = 7.1 Hz, 1H), 7.04 (t, *J* = 7.1 Hz, 1H), 4.45 (q, *J* = 7.1 Hz, 2H), 2.78 (s, 3H), 1.45 (t, *J* = 7.1 Hz, 3H), <sup>13</sup>C NMR (100 MHz, DMSO-d<sub>6</sub>): δ 161.3, 153.7, 142.5, 131.1, 125.7, 125.6, 122.2 (q, *J* = 272.2 Hz), 113.5, 112.0, 60.8, 16.9, 14.4; HRMS (ESI-MS): Calc. for C<sub>12</sub>H<sub>12</sub>F<sub>3</sub>N<sub>2</sub>O<sub>2</sub> [(M+H)<sup>+</sup>]: 273.08454, Found: 273.08563.

**1h**: Obtained 0.29 g (52%) **1h** as pale yellow solid from 0.62 g of **1h2**. mp= 171-173°C; <sup>1</sup>H NMR (400 MHz, DMSO-d<sub>6</sub>): δ 9.49 (d, *J* = 7.0 Hz, 1H), 7.94 (d, *J* = 7.3 Hz, 1H), 7.26 (t, *J* = 7.1 Hz, 1H), 2.65 (s, 3H); <sup>13</sup>C NMR (75 MHz, DMSO-d<sub>6</sub>): δ 162.0, 152.1, 141.3, 131.7, 126.3 (X2), 119.2 (q, *J* = 272.1 Hz), 112.5, 16.1; HRMS (ESI-MS): Calc. for C<sub>10</sub>H<sub>8</sub>F<sub>3</sub>N<sub>2</sub>O<sub>2</sub> [(M+H)<sup>+</sup>]: 245.05324, Found: 245.05448.

## $^1\text{H}$ and $^{13}\text{C}$ NMR spectra of the compounds

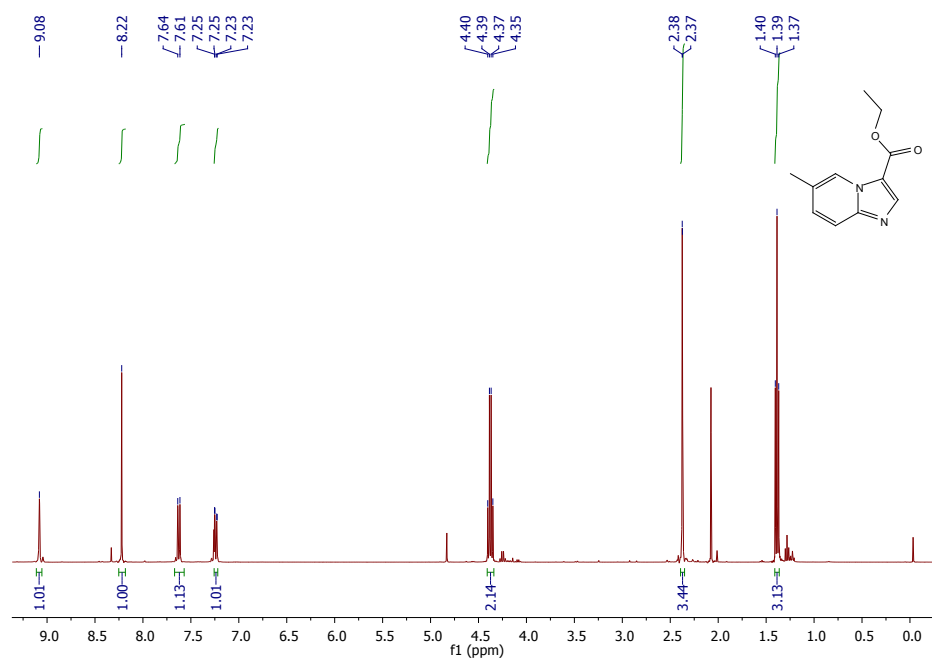

$^1\text{H}$  NMR spectrum of **1b2**

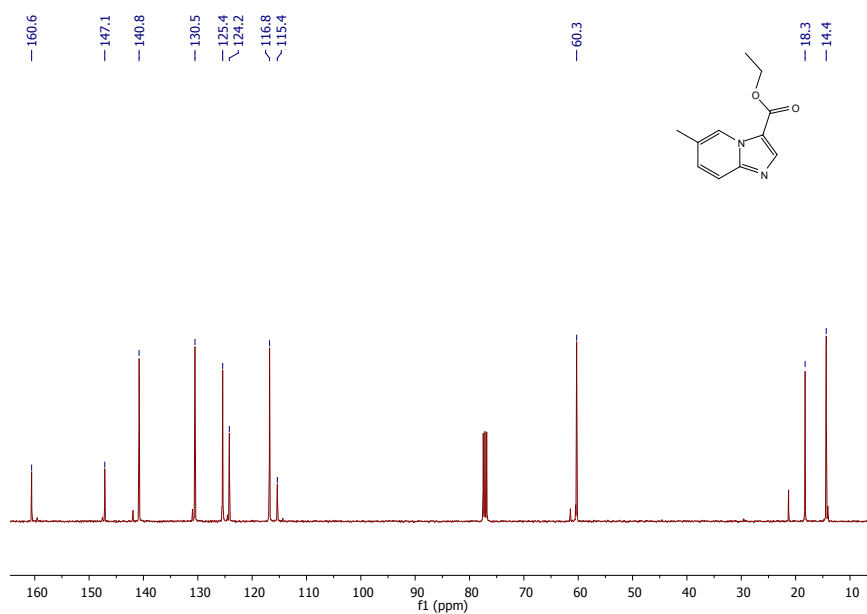

$^{13}\text{C}$  NMR spectrum of **1b2**

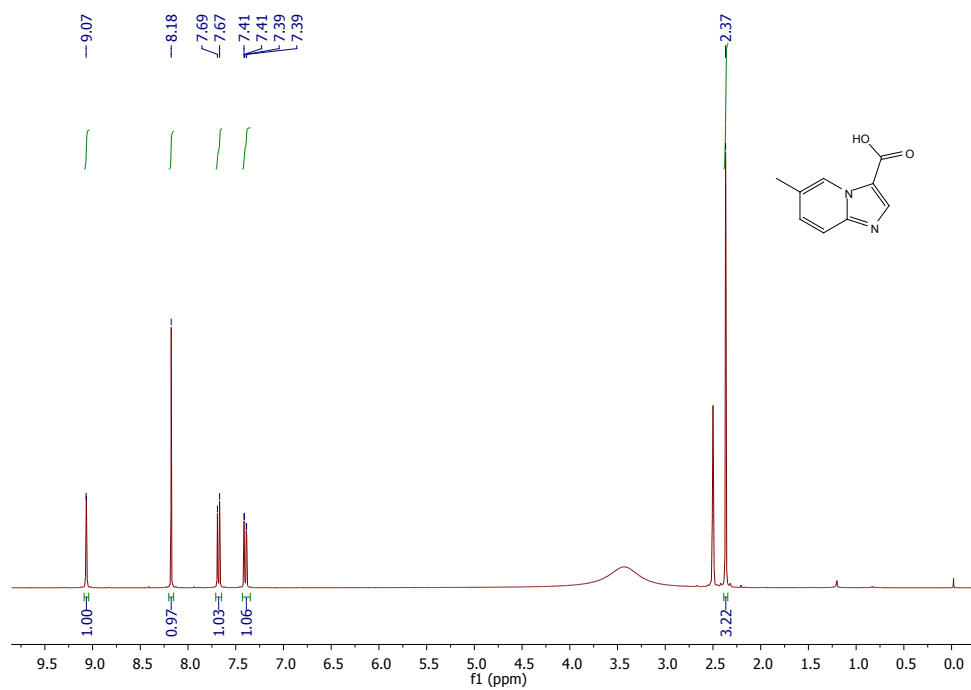

$^1\text{H}$  NMR spectrum of **1b**

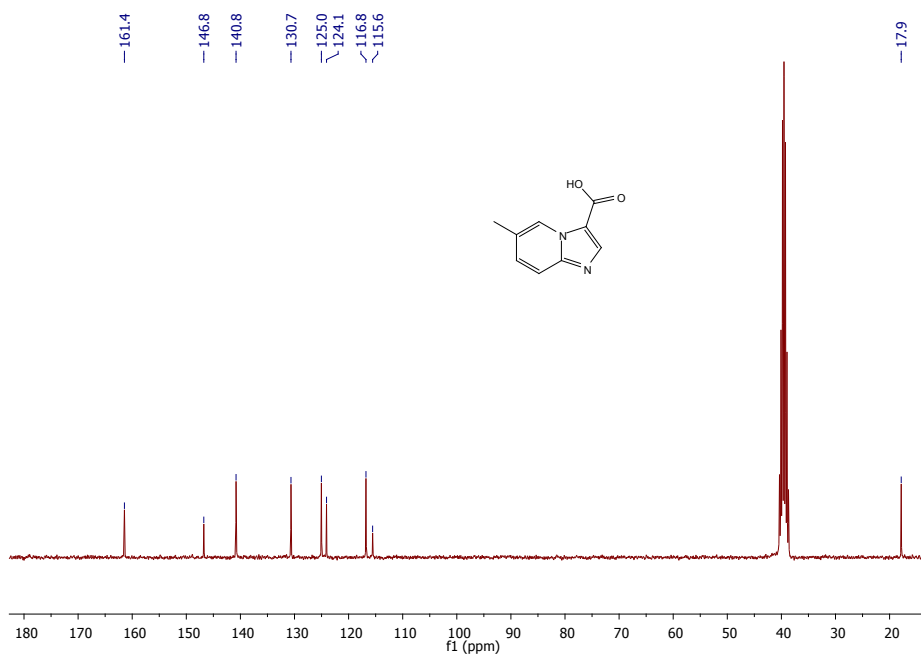

$^{13}\text{C}$  NMR spectrum of **1b**

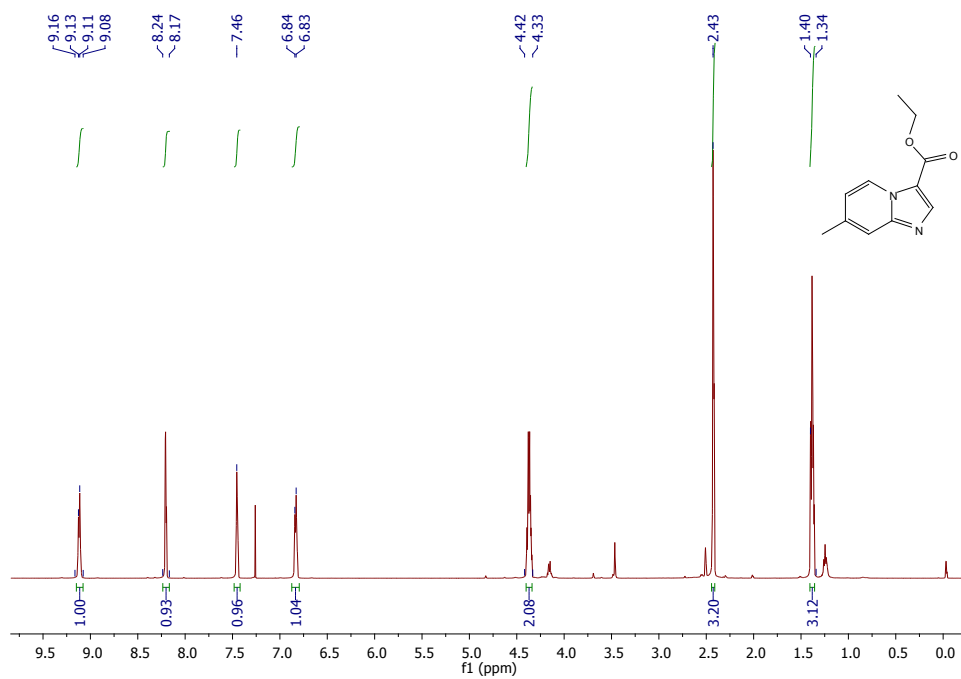

$^1\text{H}$  NMR spectrum of **1c2**

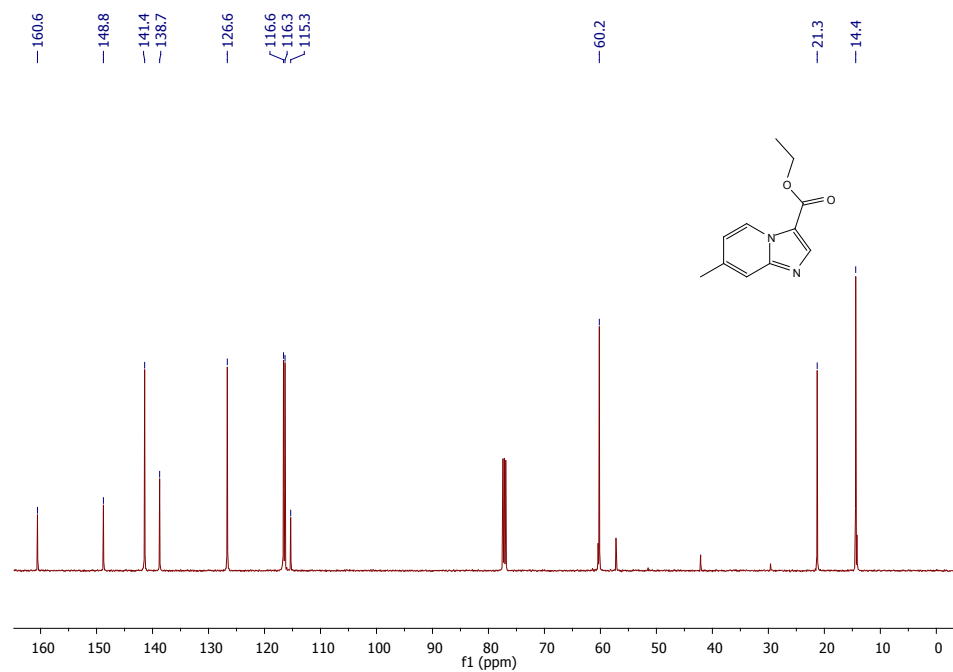

$^{13}\text{C}$  NMR spectrum of **1c2**

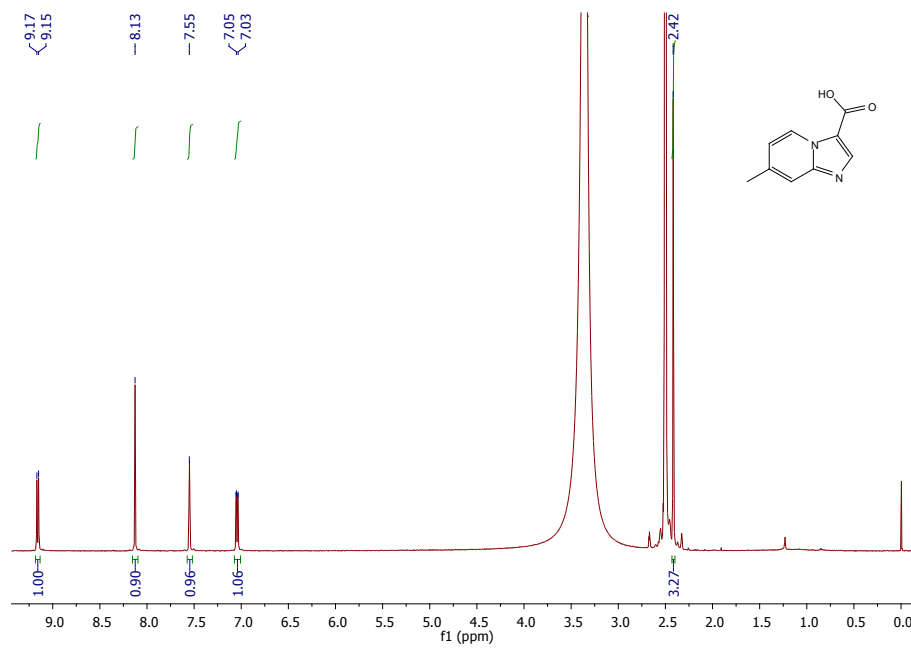

$^1\text{H}$  NMR spectrum of **1c**

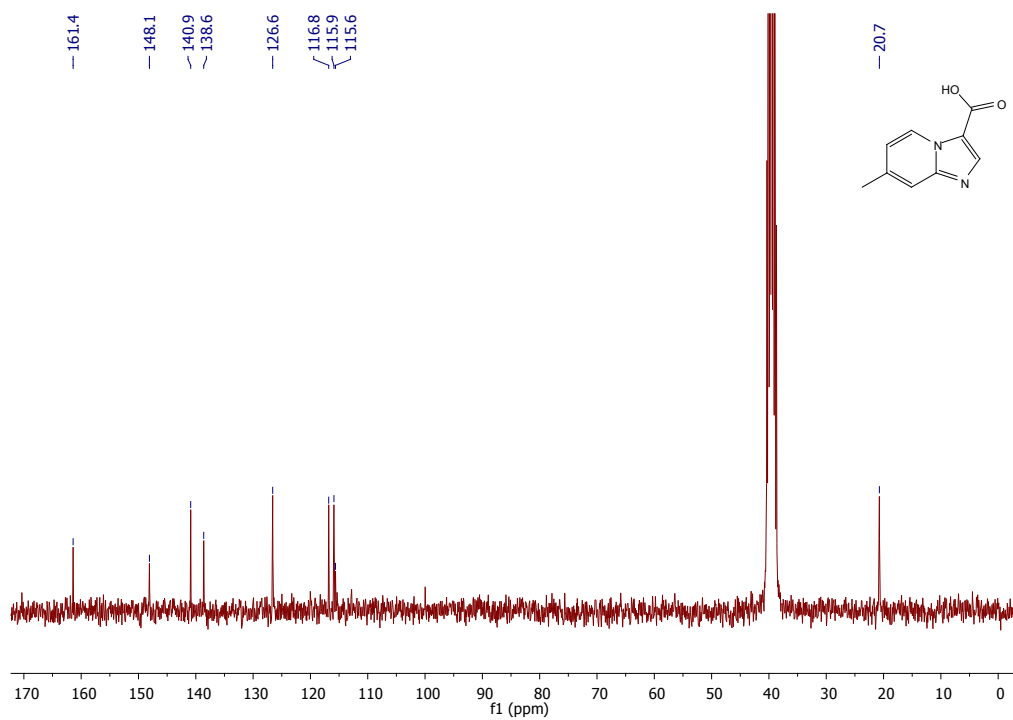

$^{13}\text{C}$  NMR spectrum of **1c**

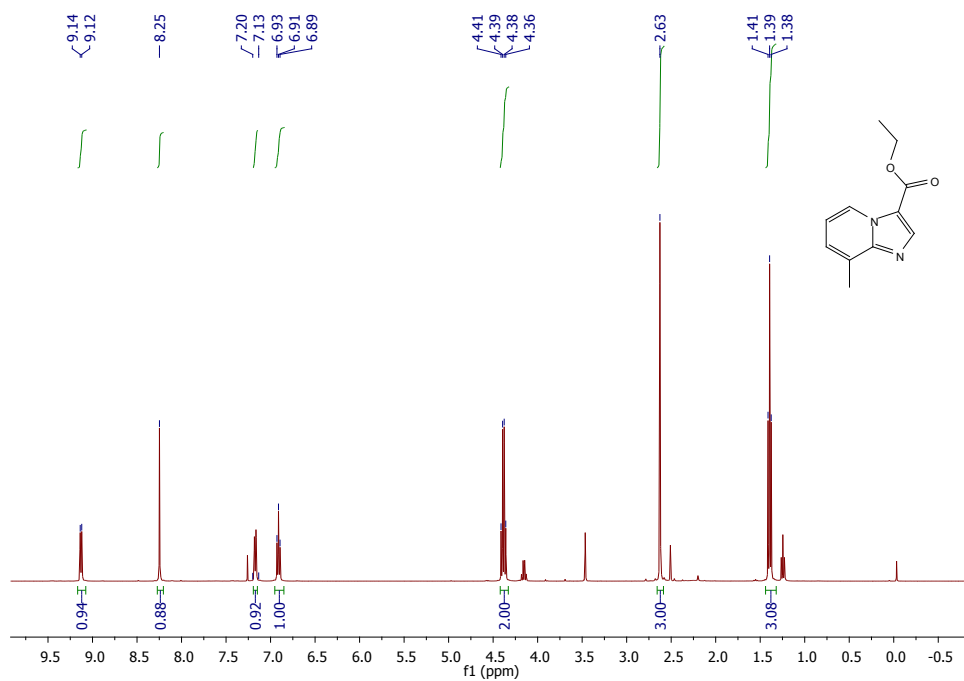

$^1\text{H}$  NMR spectrum of **1d2**

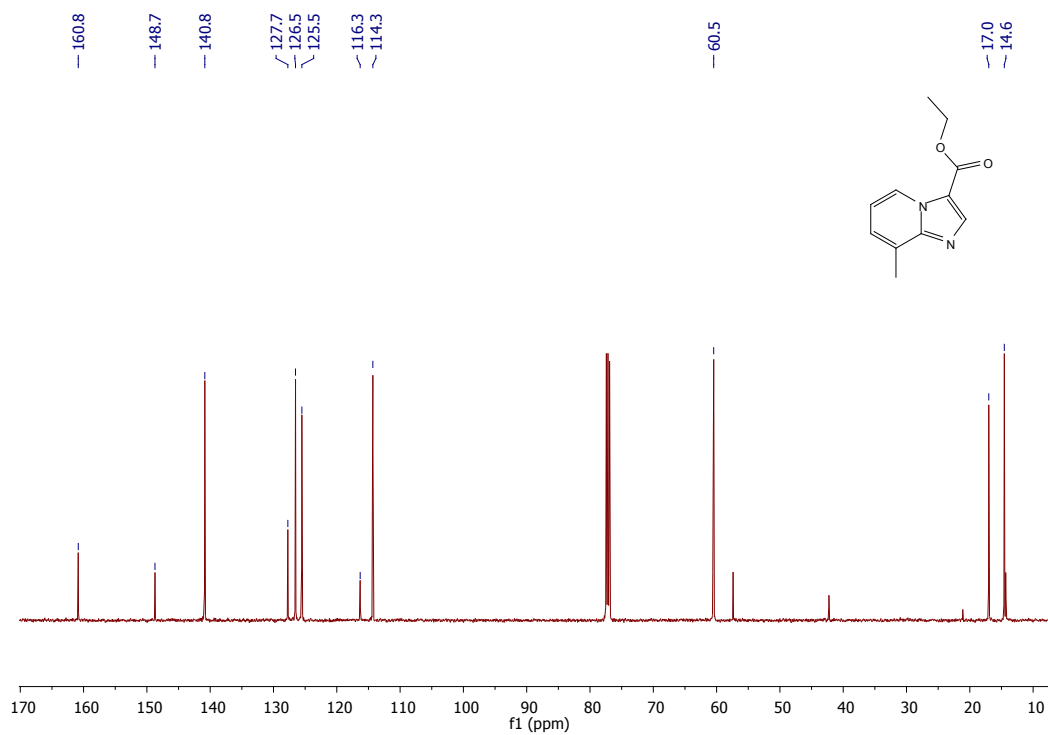

$^{13}\text{C}$  NMR spectrum of **1d2**

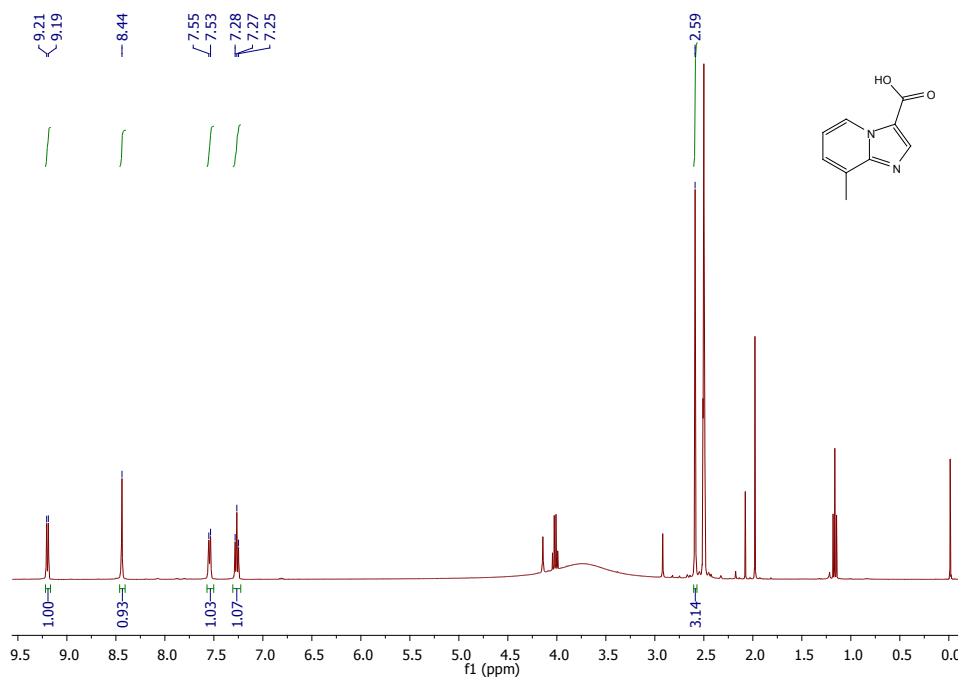

$^1\text{H}$  NMR spectrum of **1d**

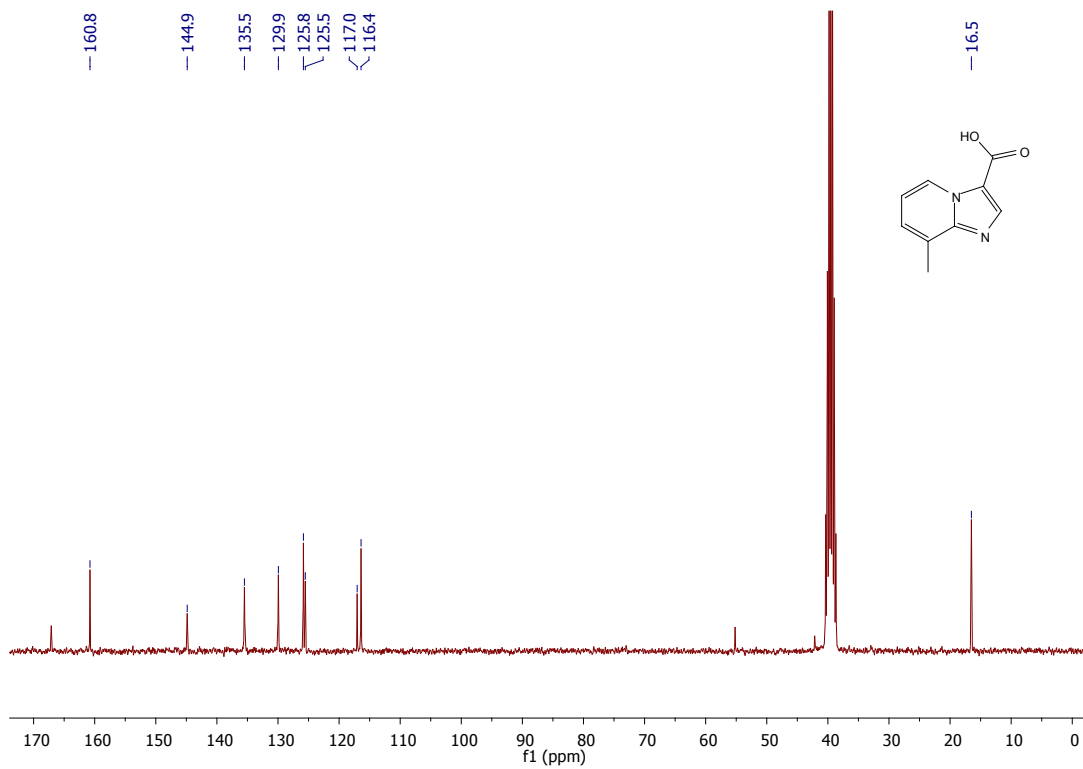

$^{13}\text{C}$  NMR spectrum of **1d**

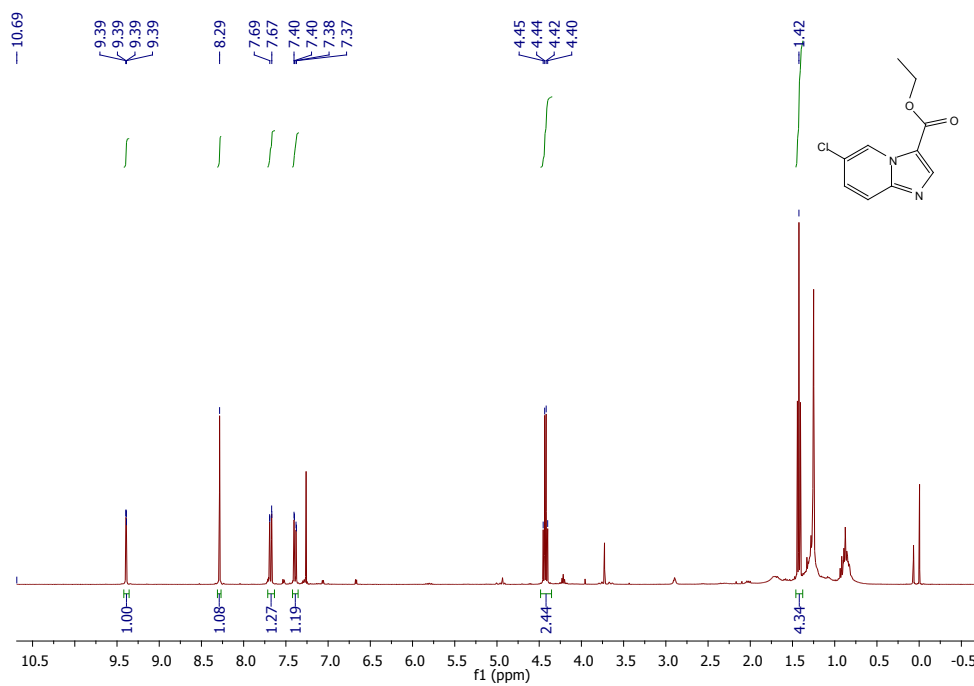

$^1\text{H}$  NMR spectrum of **1f2**

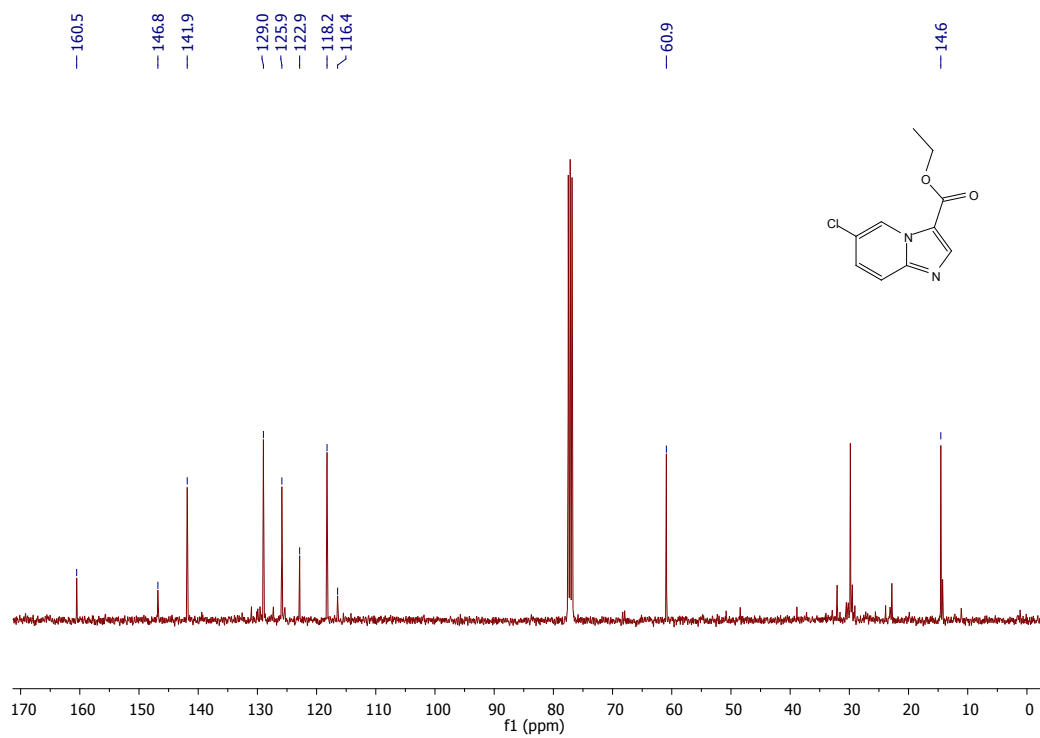

$^{13}\text{C}$  NMR spectrum of **1f2**



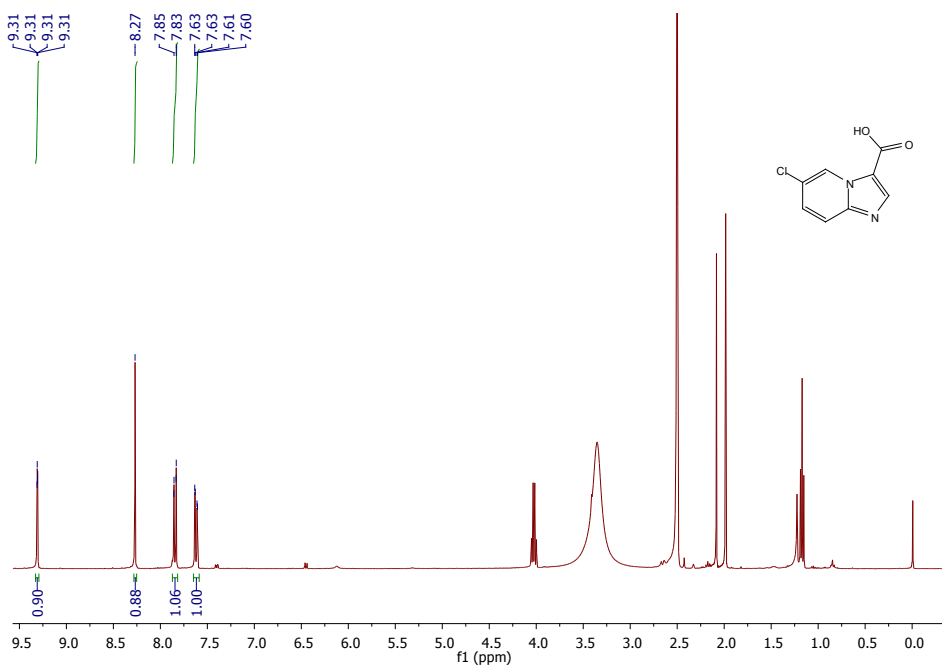

<sup>1</sup>H NMR spectrum of **1f**

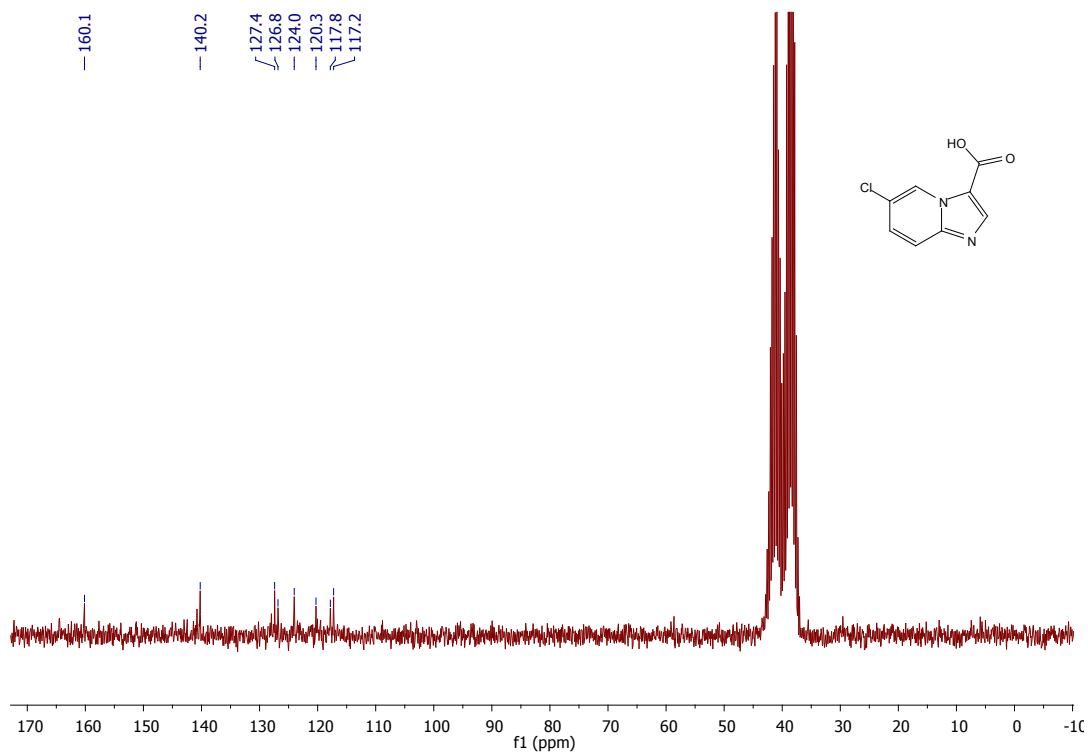

<sup>13</sup>C NMR spectrum of **1f**

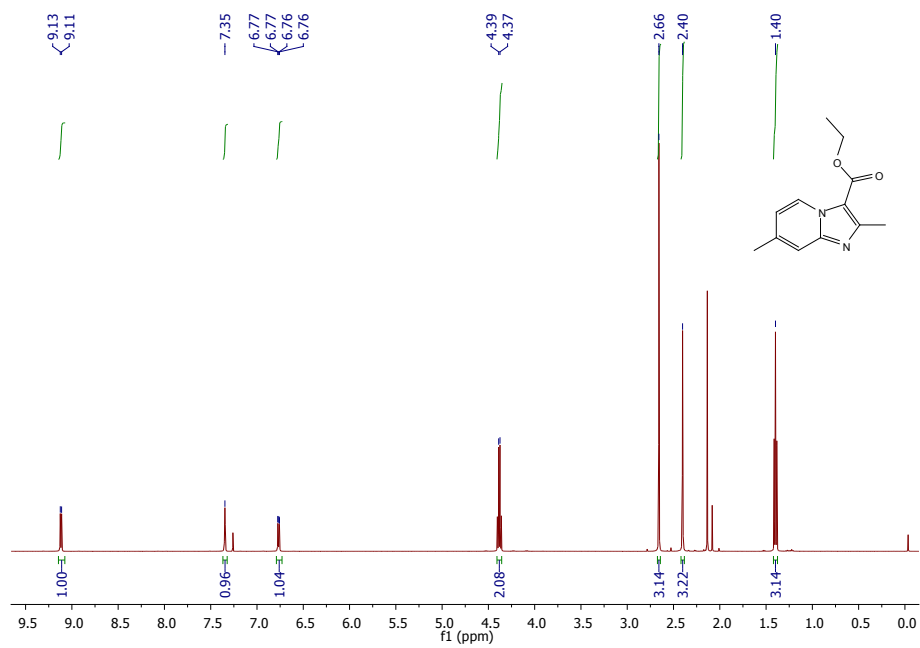

$^1\text{H}$  NMR spectrum of **1e2**

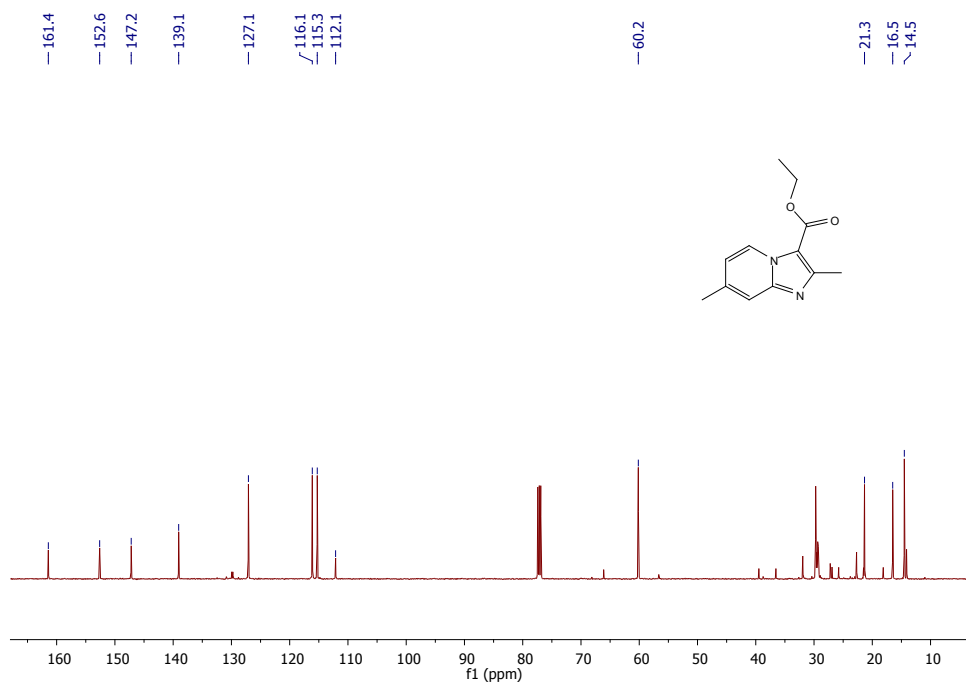

$^{13}\text{C}$  NMR spectrum of **1e2**

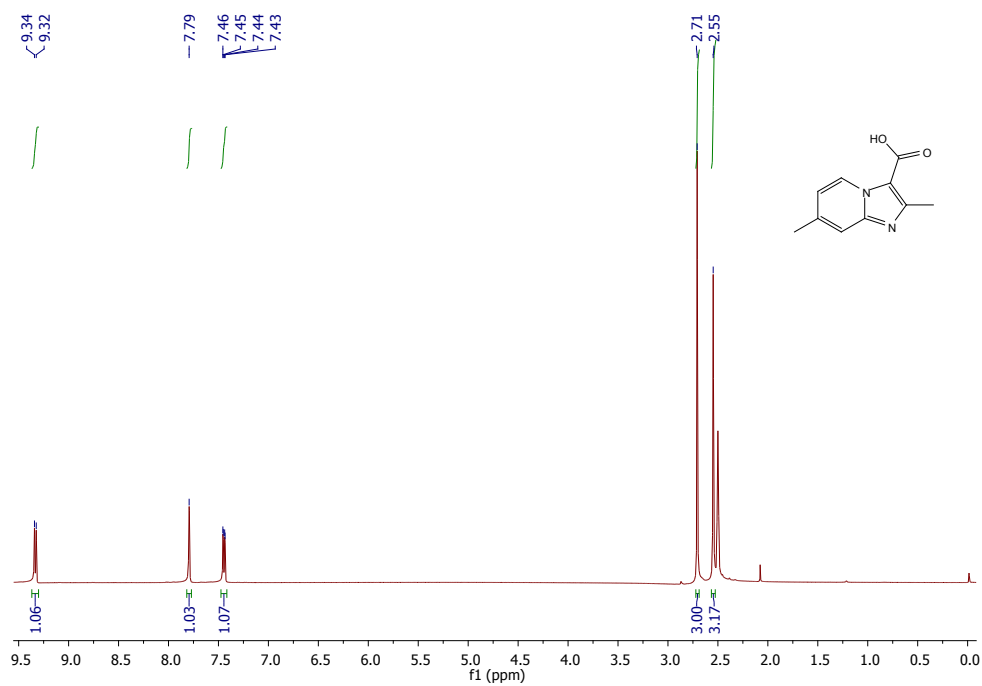

$^1\text{H}$  NMR spectrum of **1e**

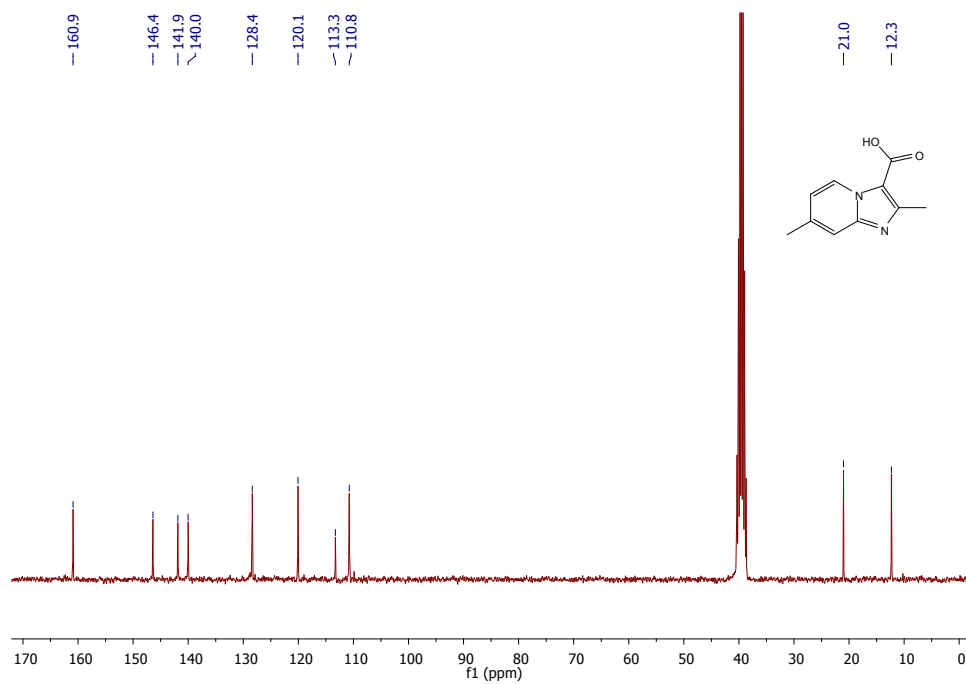

$^{13}\text{C}$  NMR spectrum of **1e**

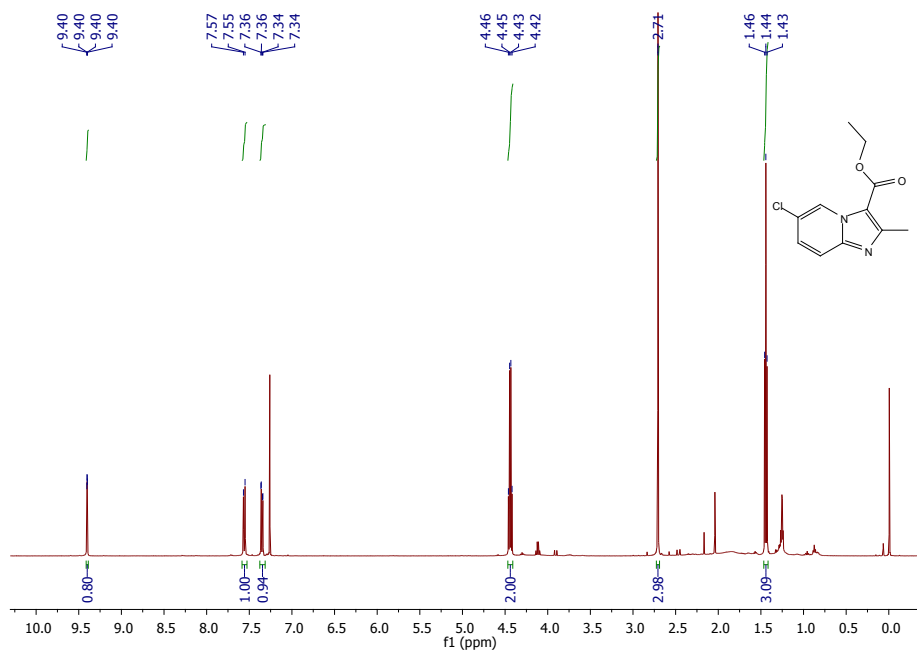

$^1\text{H}$  NMR spectrum of **1g2**

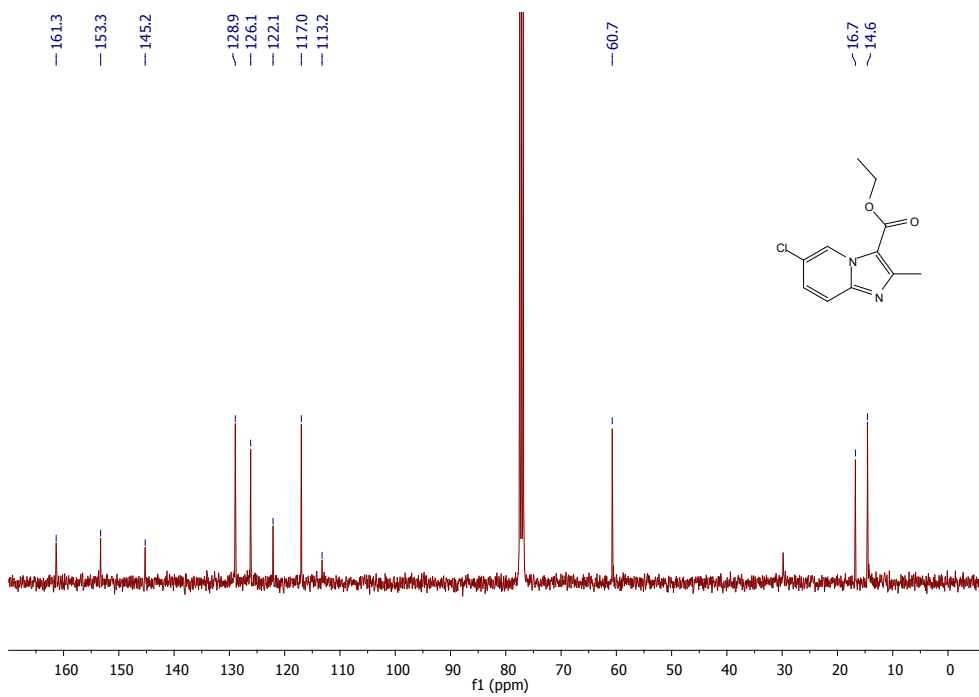

$^{13}\text{C}$  NMR spectrum of **1g2**

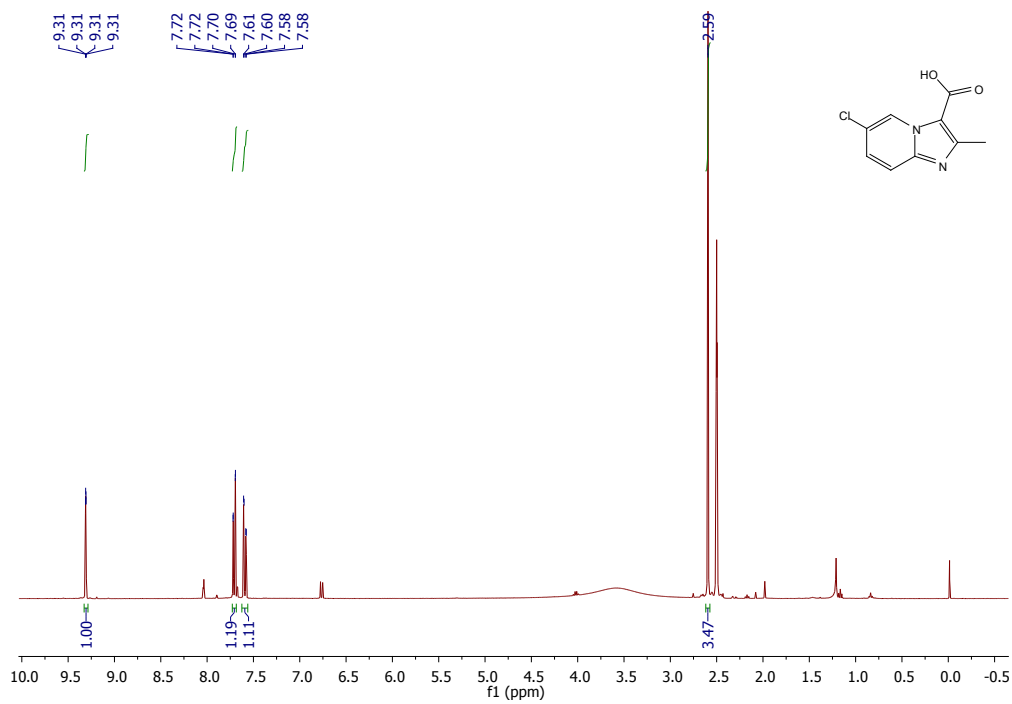

$^1\text{H}$  NMR spectrum of **1g**

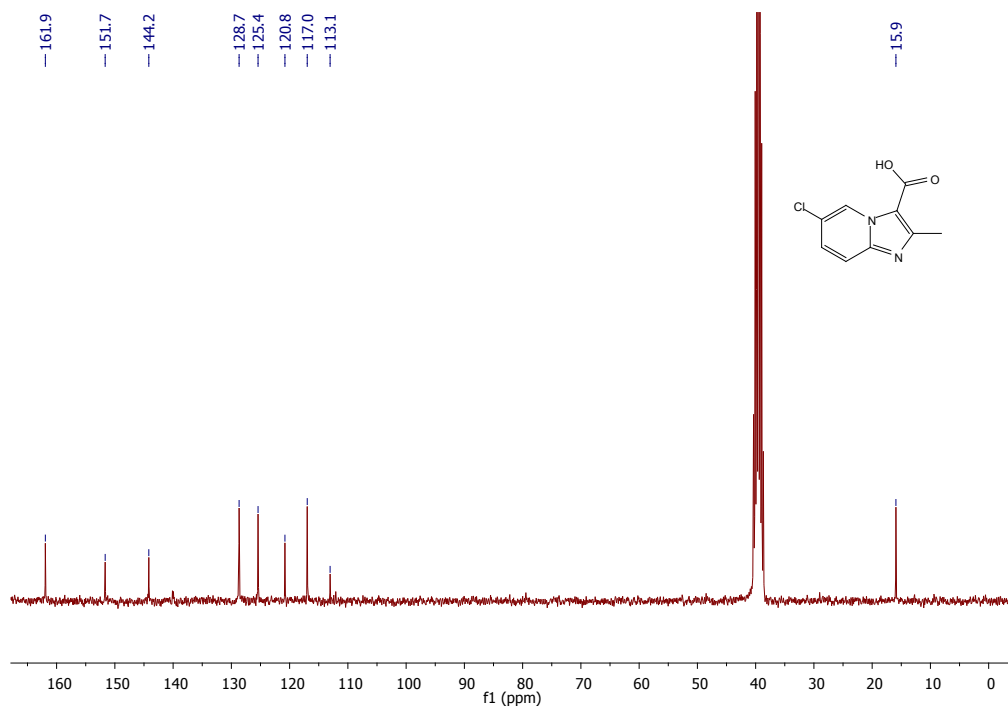

$^{13}\text{C}$  NMR spectrum of **1g**

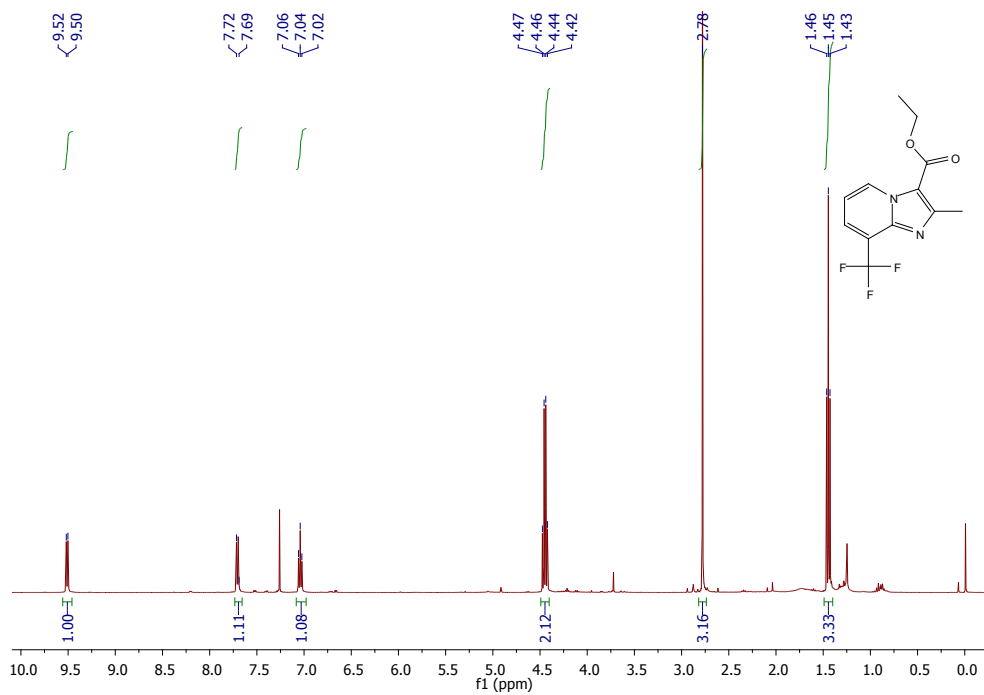

$^1\text{H}$  NMR spectrum of **1h2**

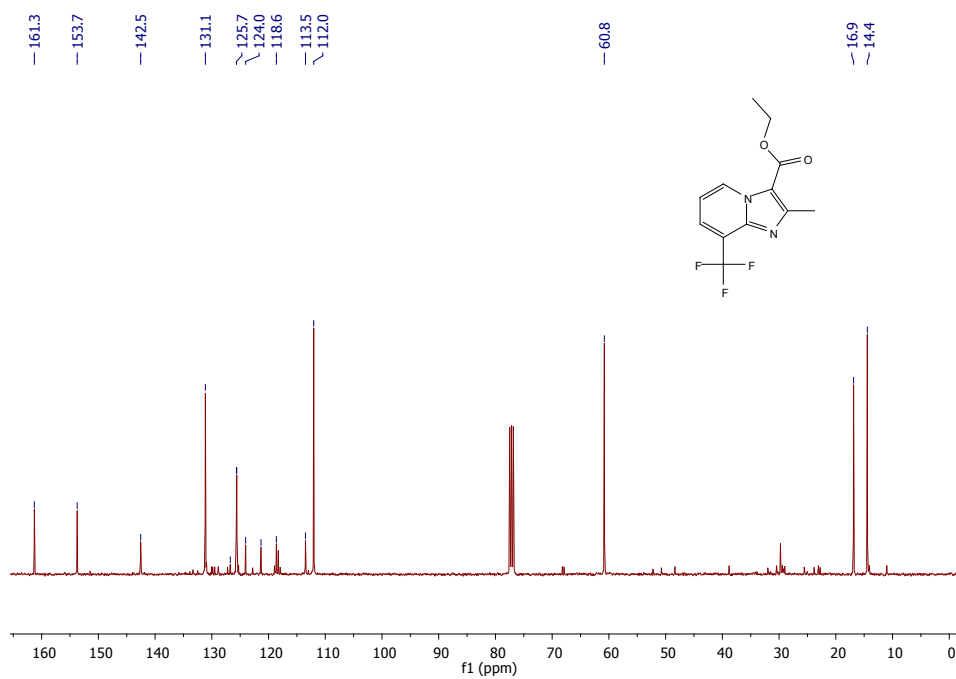

$^{13}\text{C}$  NMR spectrum of **1h2**

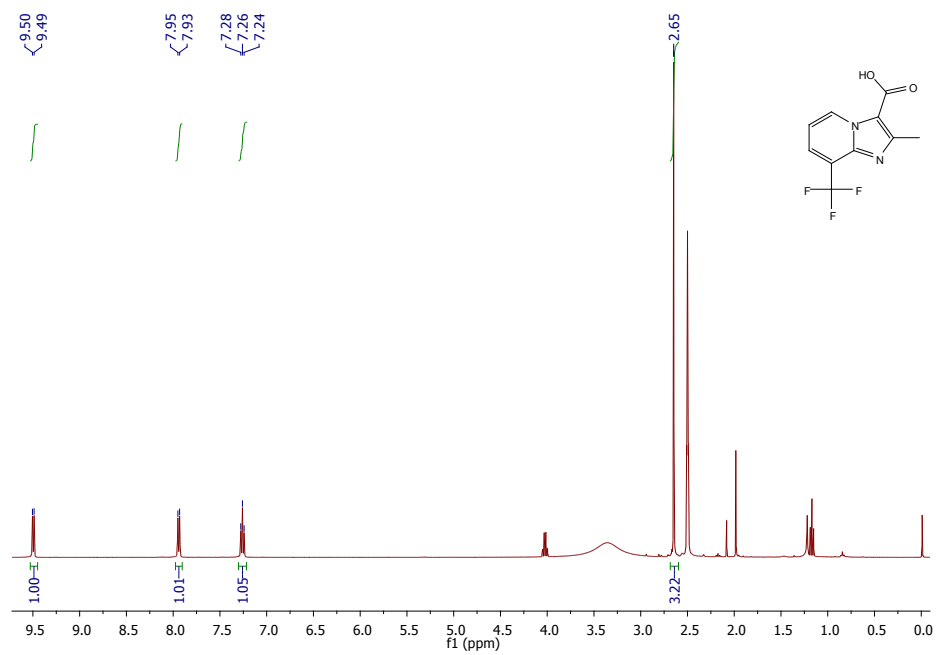

$^1\text{H}$  NMR spectrum of **1h**

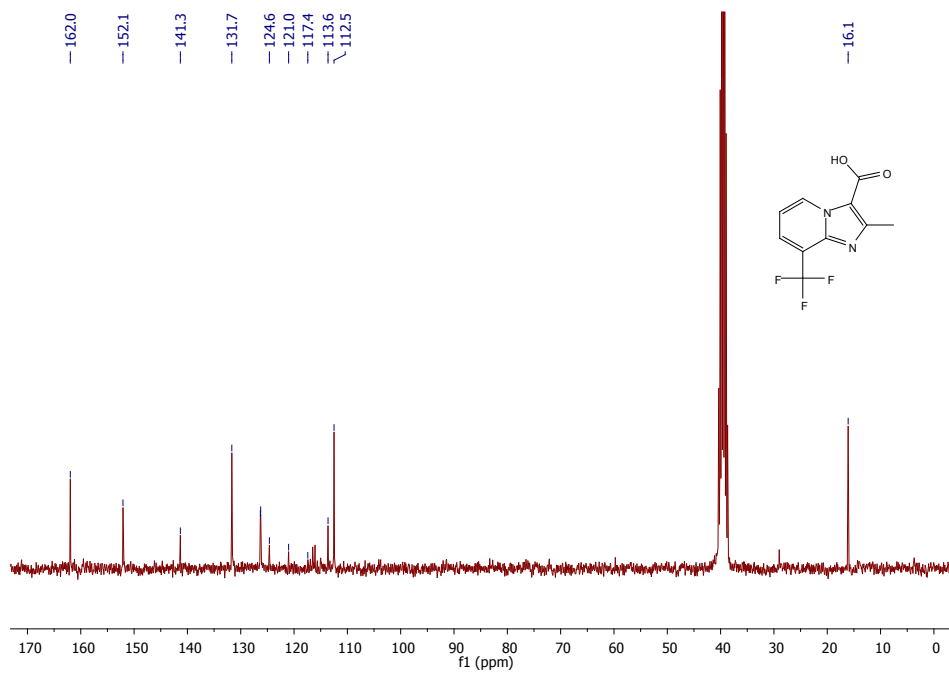

$^{13}\text{C}$  NMR spectrum of **1h**

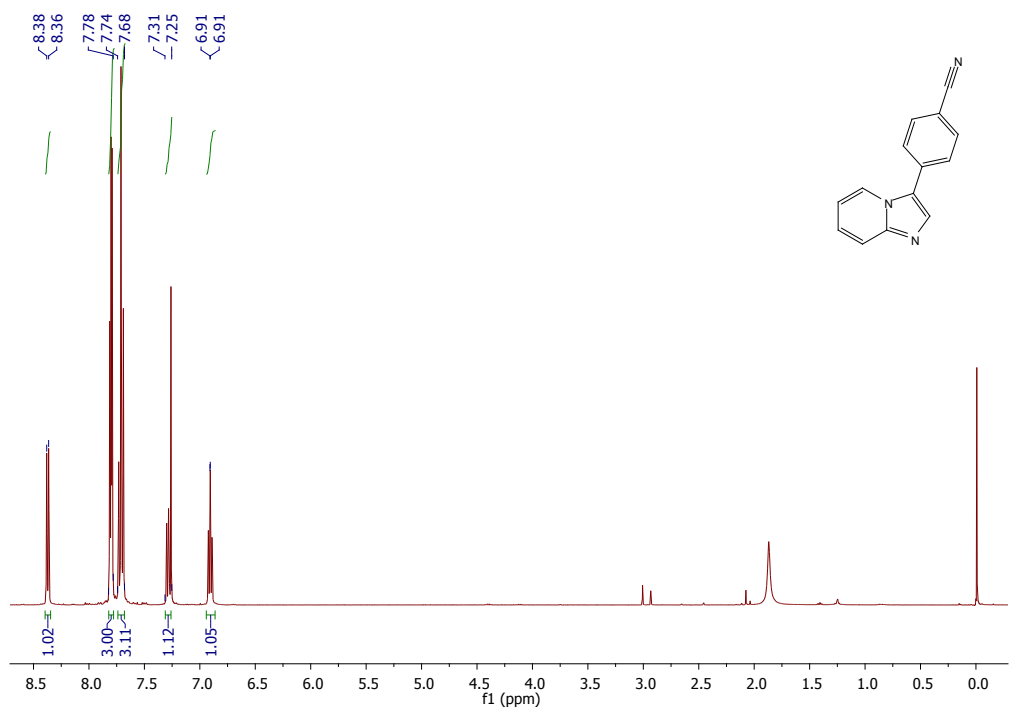

<sup>1</sup>H NMR spectrum of **3a**

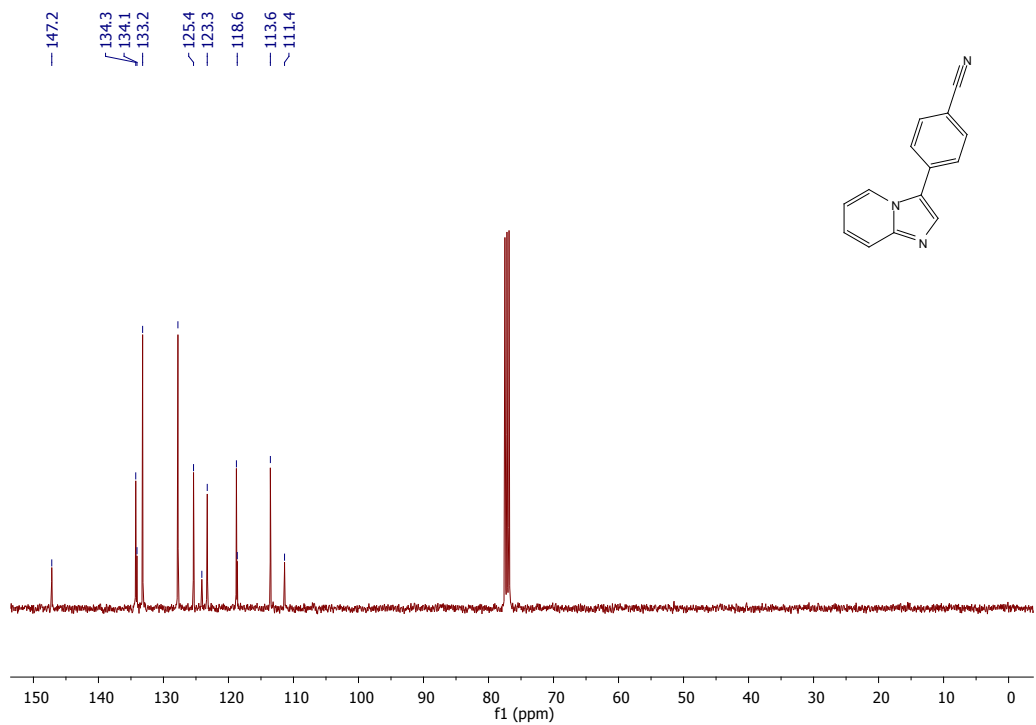

<sup>13</sup>C NMR spectrum of **3a**



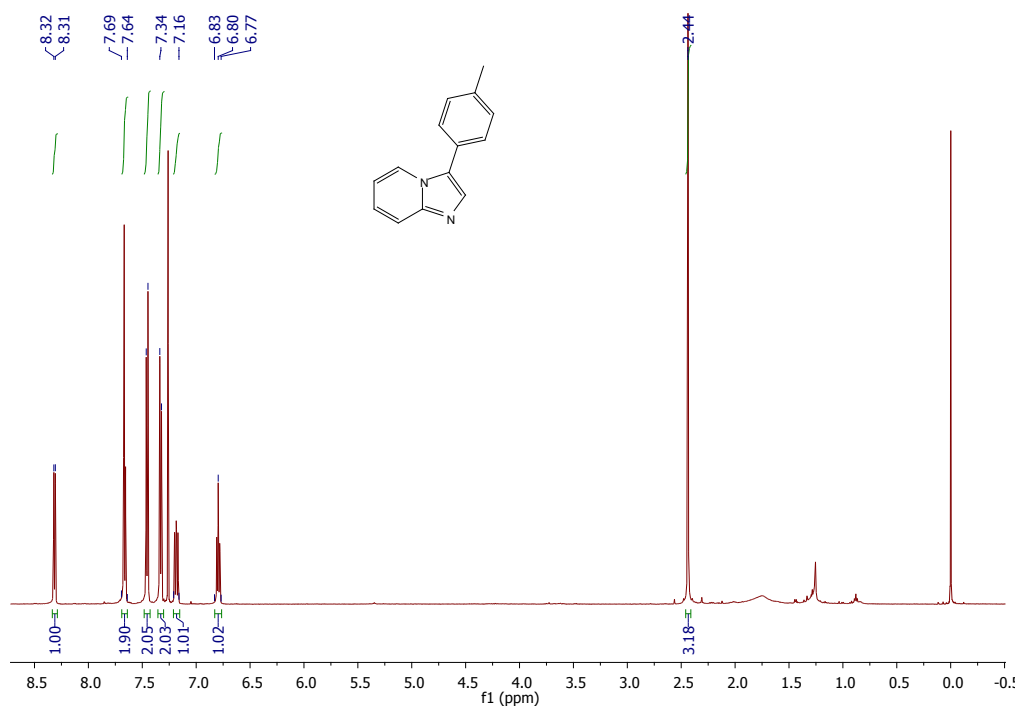

$^1\text{H}$  NMR spectrum of **3b**

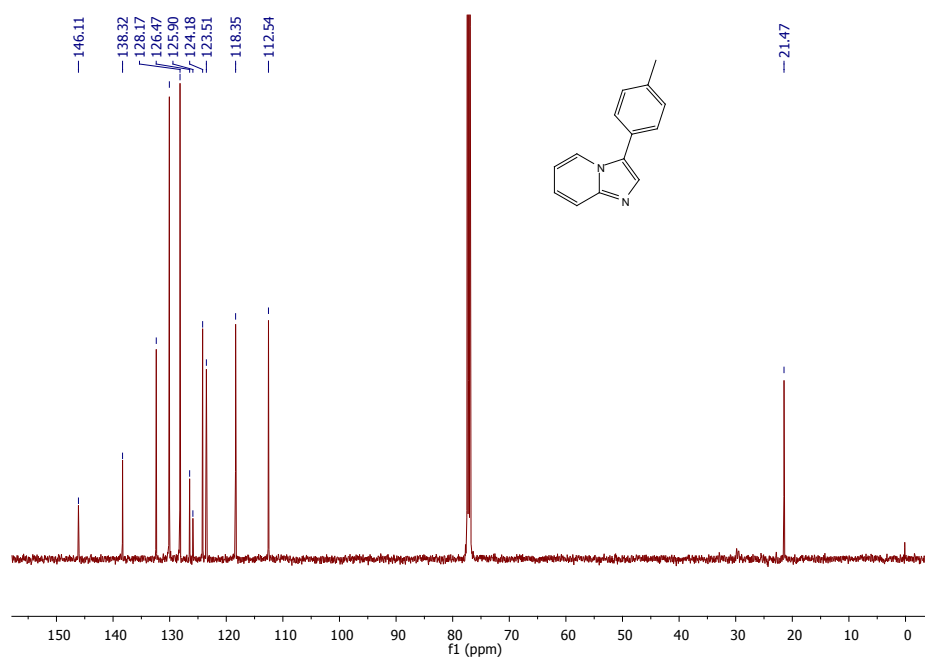

$^{13}\text{C}$  NMR spectrum of **3b**

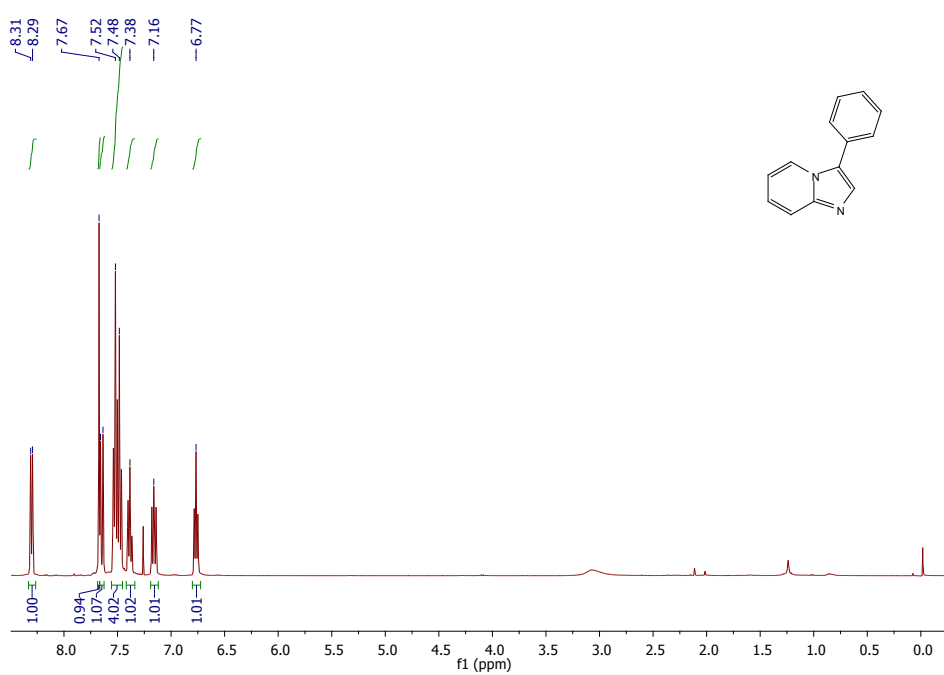

$^1\text{H}$  NMR spectrum of **3c**

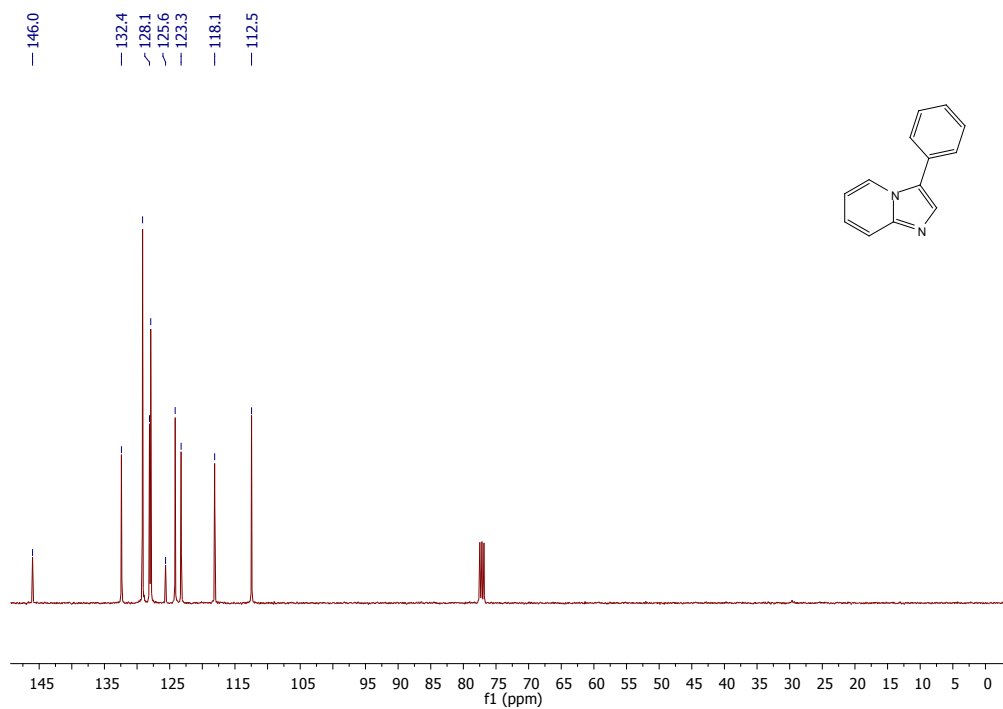

$^{13}\text{C}$  NMR spectrum of **3c**

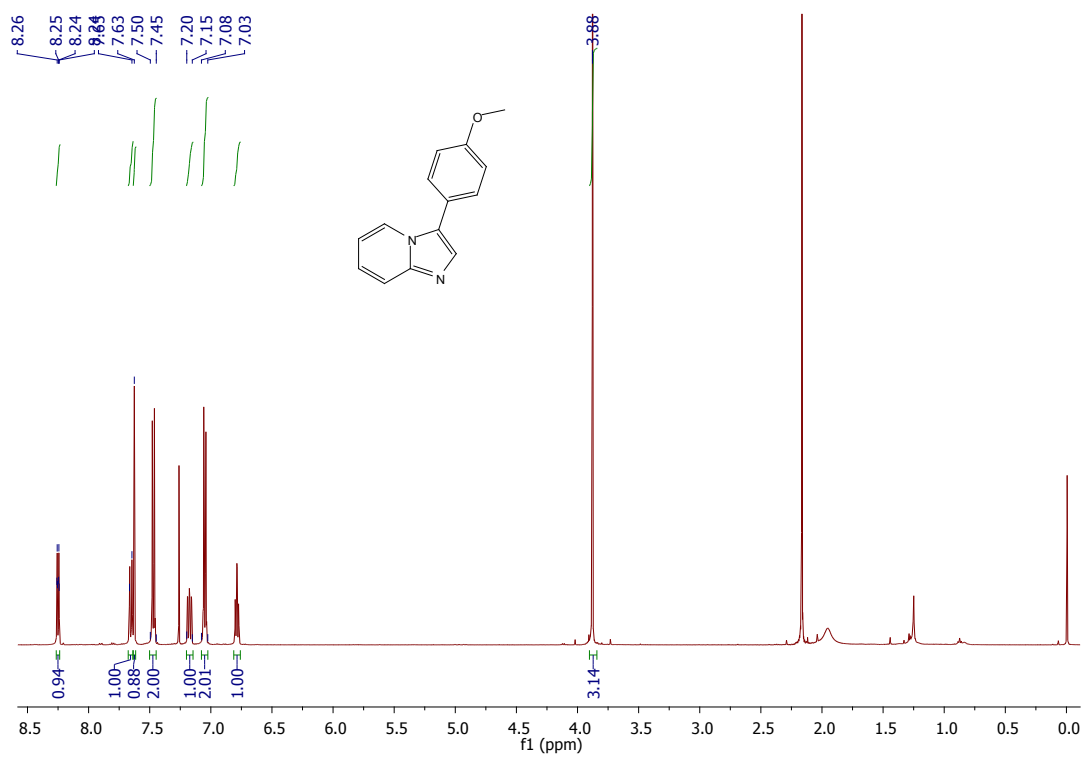

$^1\text{H}$  NMR spectrum of **3d**

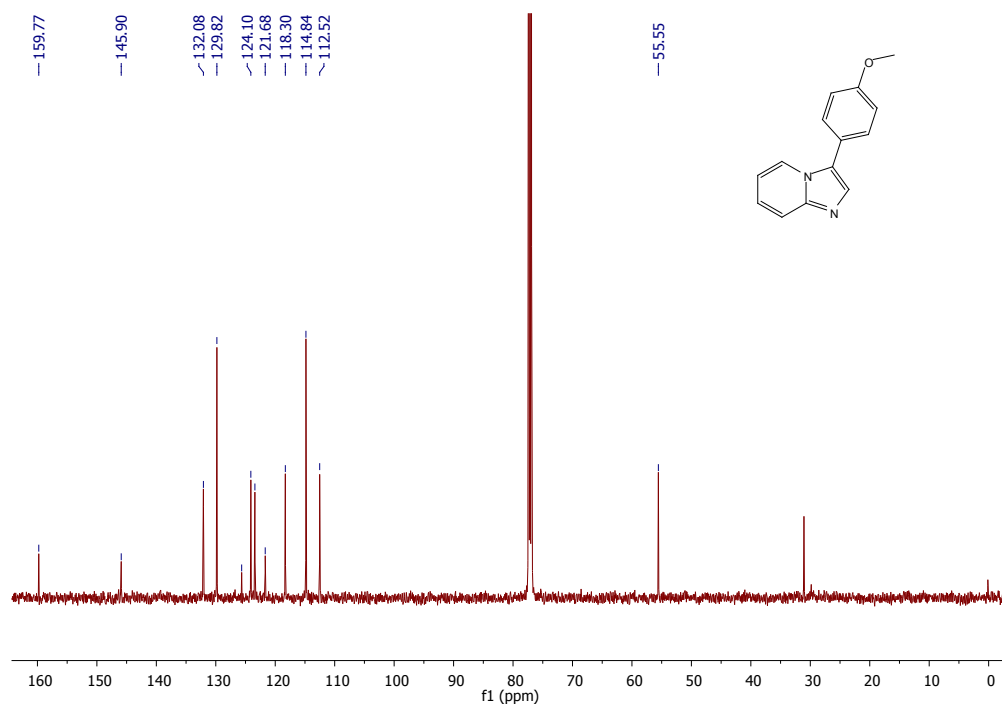

$^{13}\text{C}$  NMR spectrum of **3d**

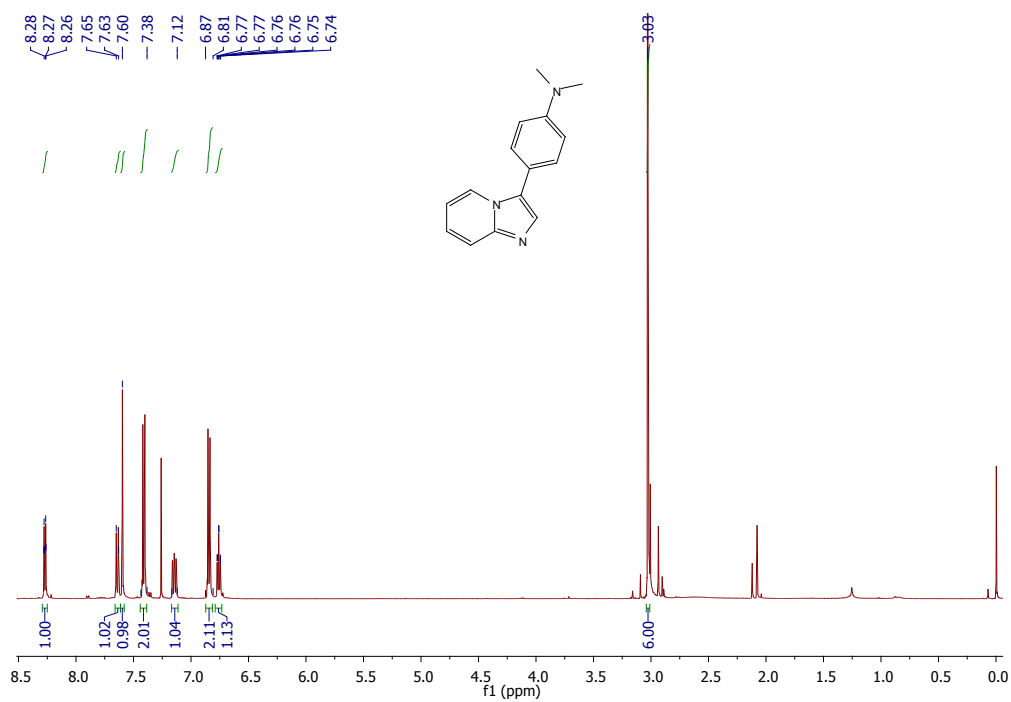

$^1\text{H}$  NMR spectrum of **3e**

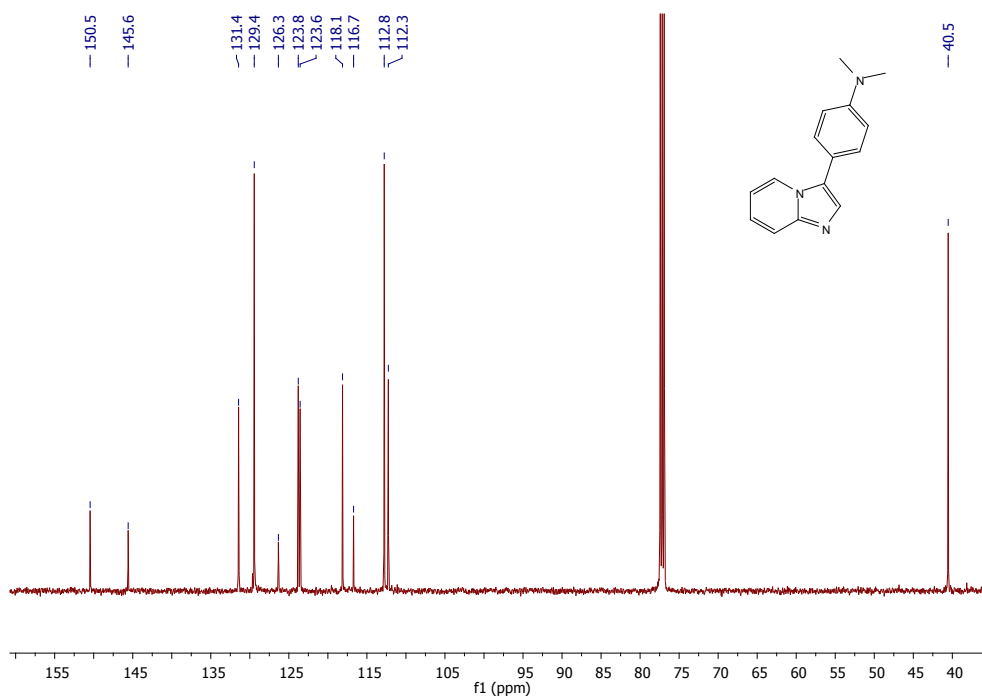

$^{13}\text{C}$  NMR spectrum of **3e**

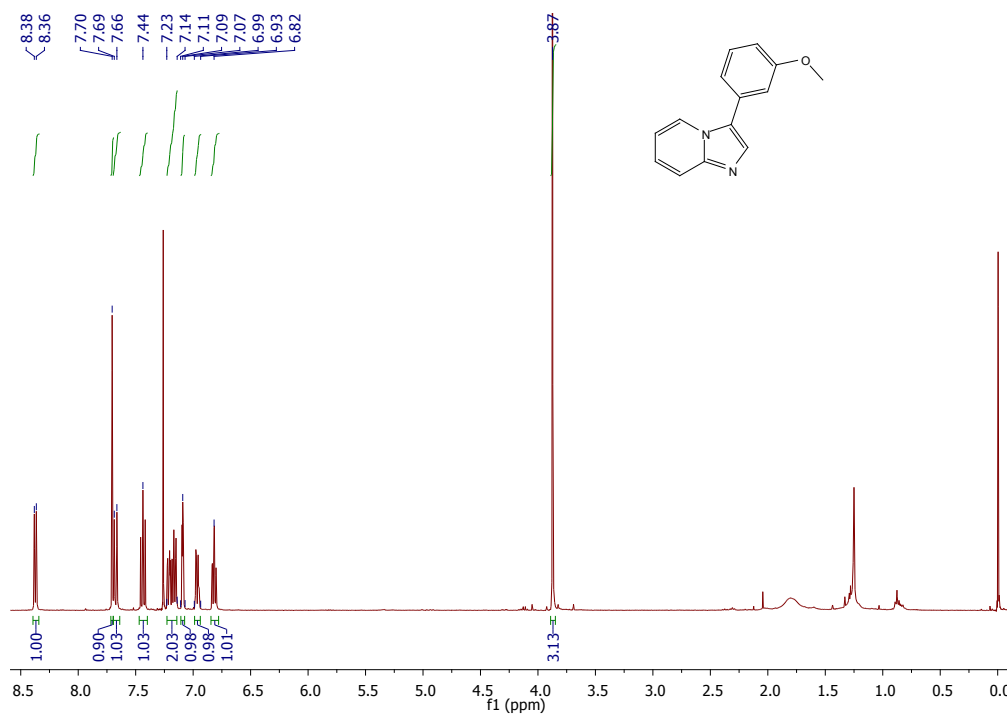

$^1\text{H}$  NMR spectrum of **3f**

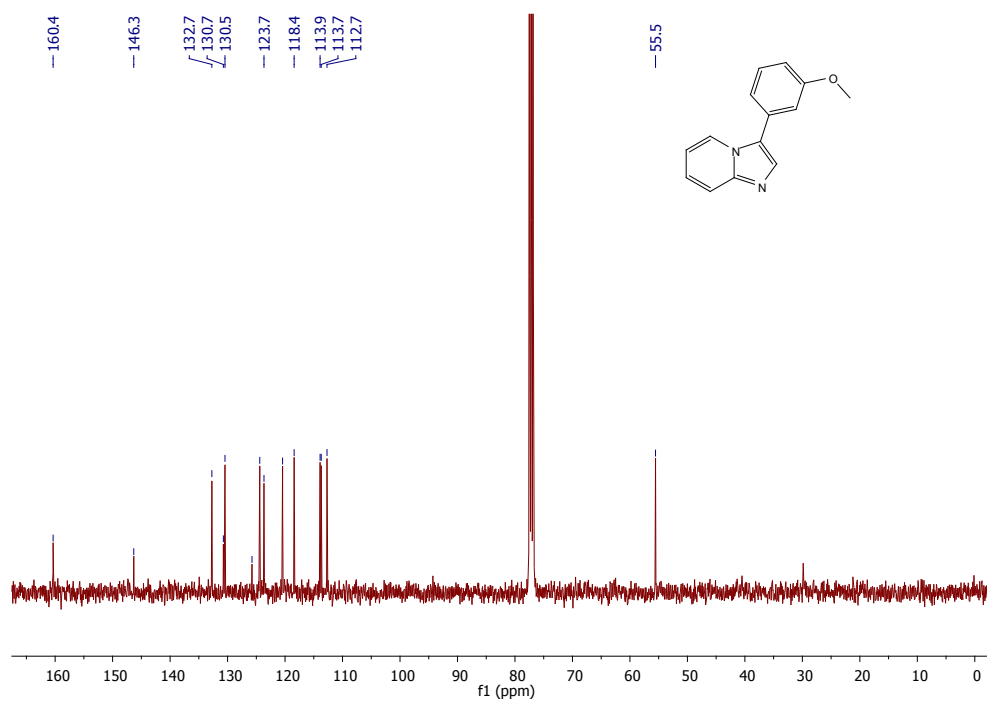

$^{13}\text{C}$  NMR spectrum of **3f**

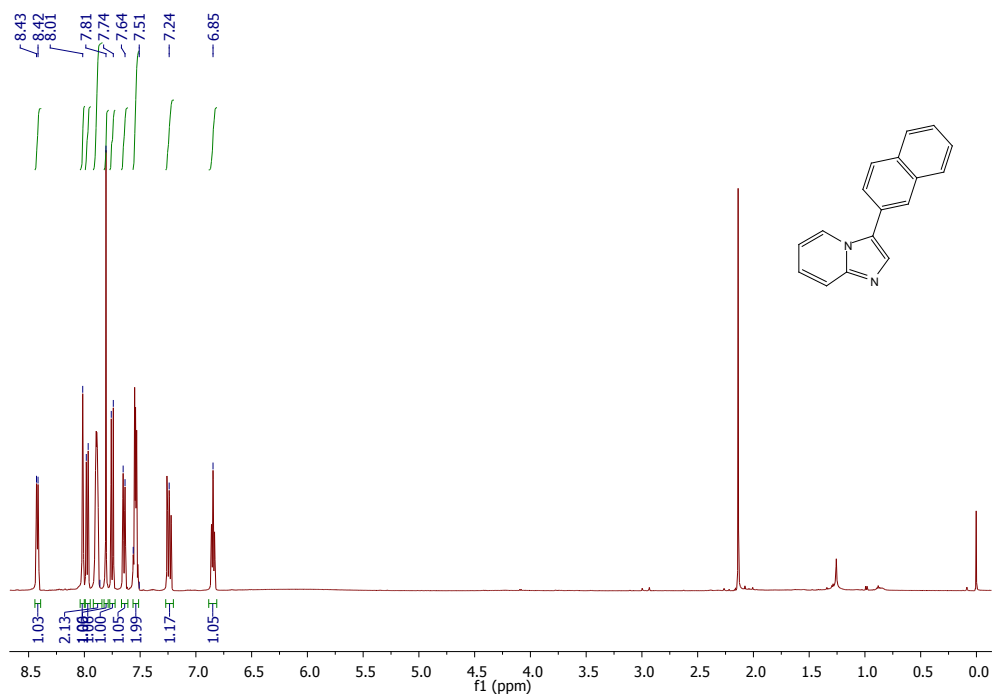

$^1\text{H}$  NMR spectrum of **3g**

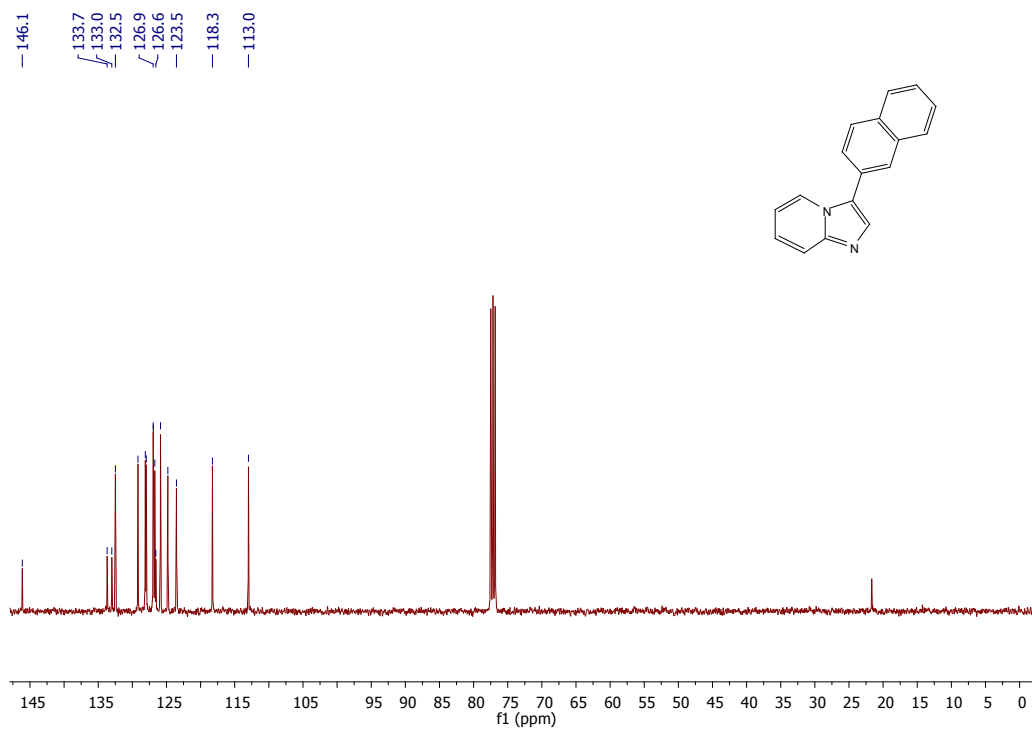

$^{13}\text{C}$  NMR spectrum of **3g**

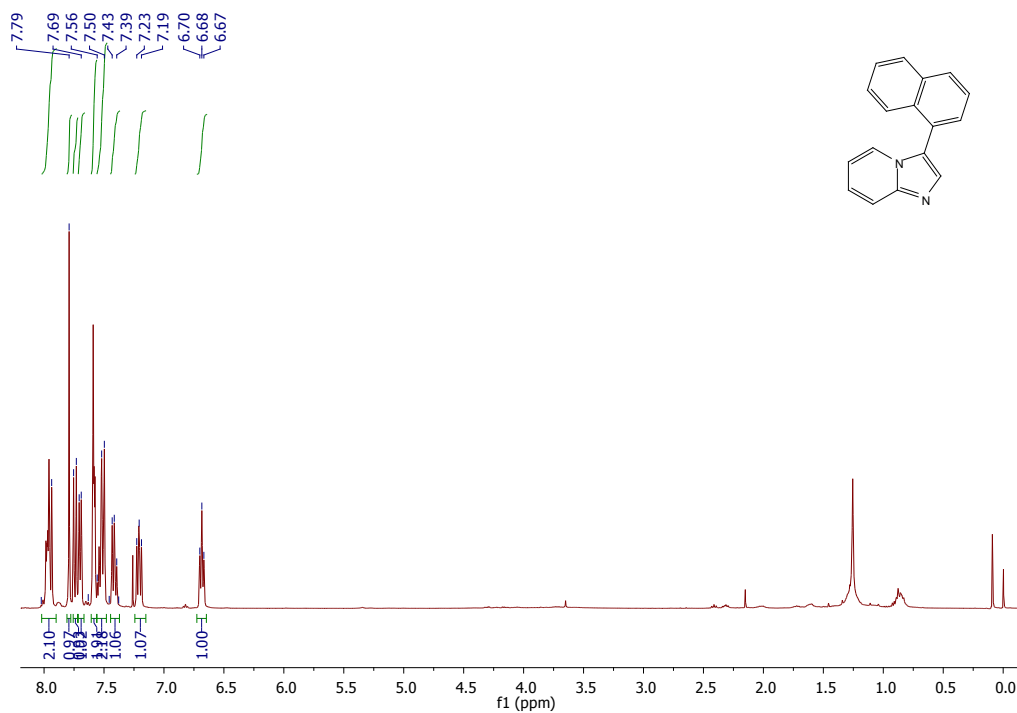

<sup>1</sup>H NMR spectrum of **3h**

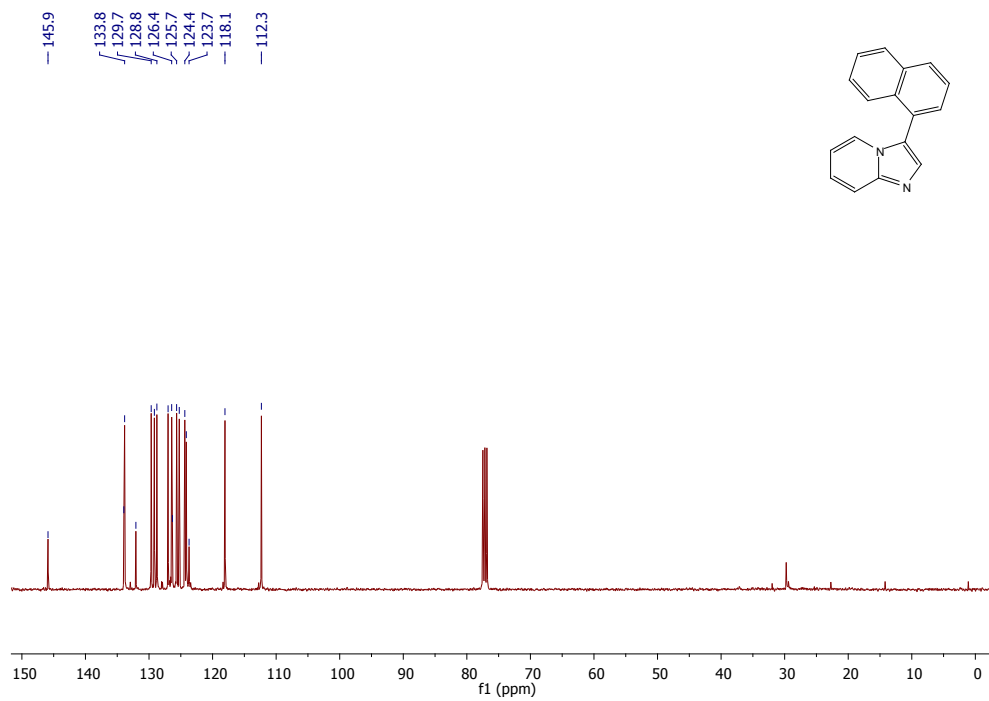

<sup>13</sup>C NMR spectrum of **3h**

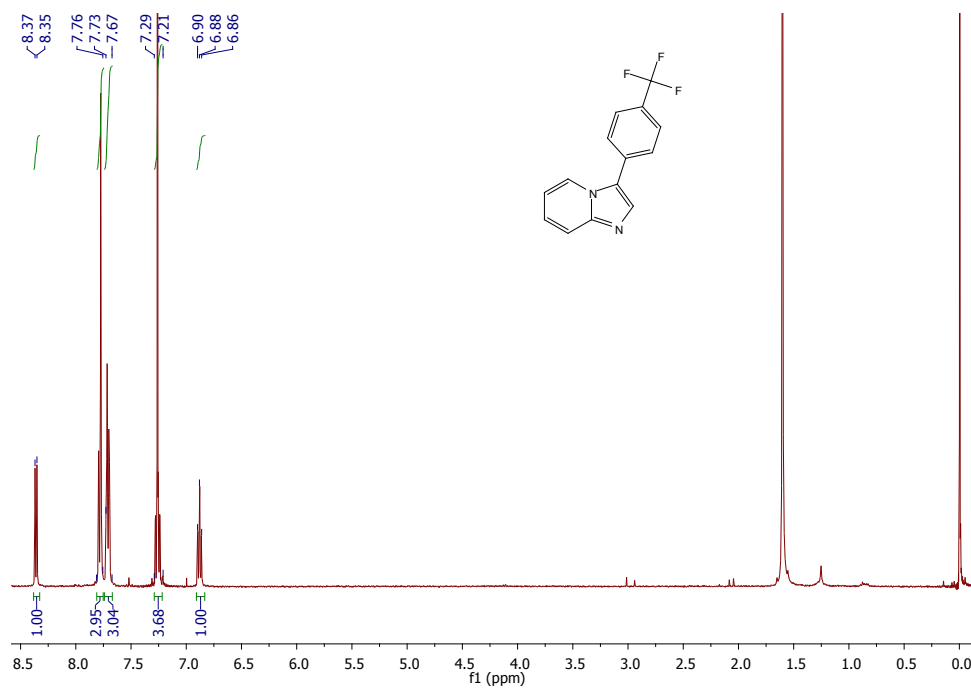

$^1\text{H}$  NMR spectrum of **3i**

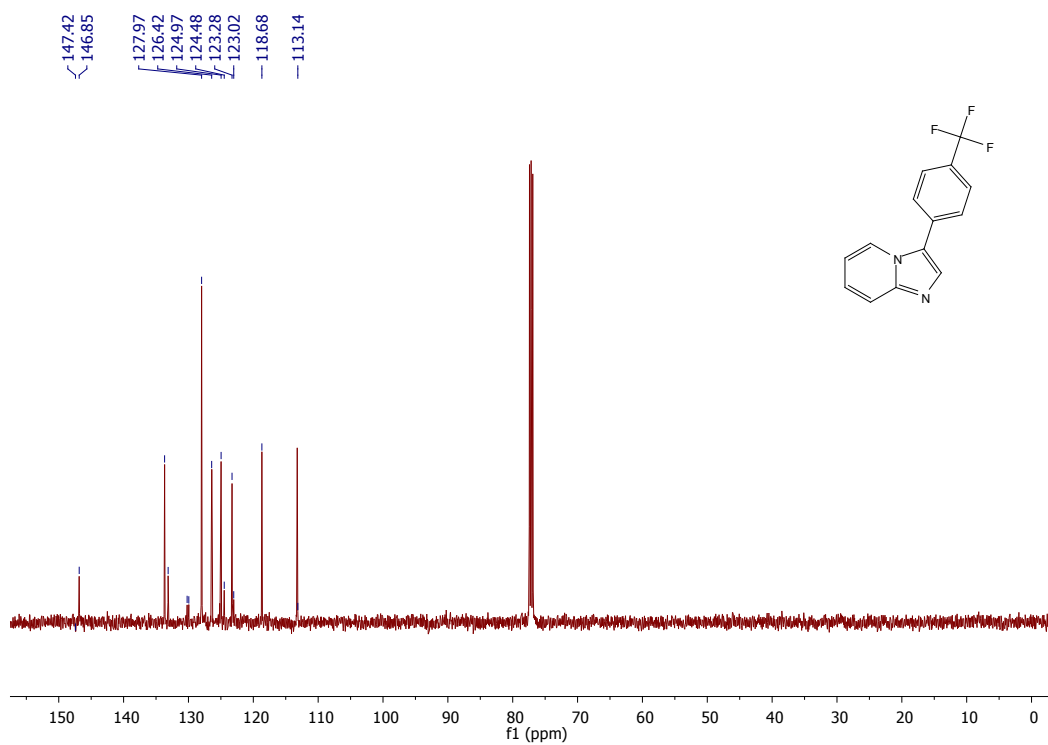

$^{13}\text{C}$  NMR spectrum of **3i**



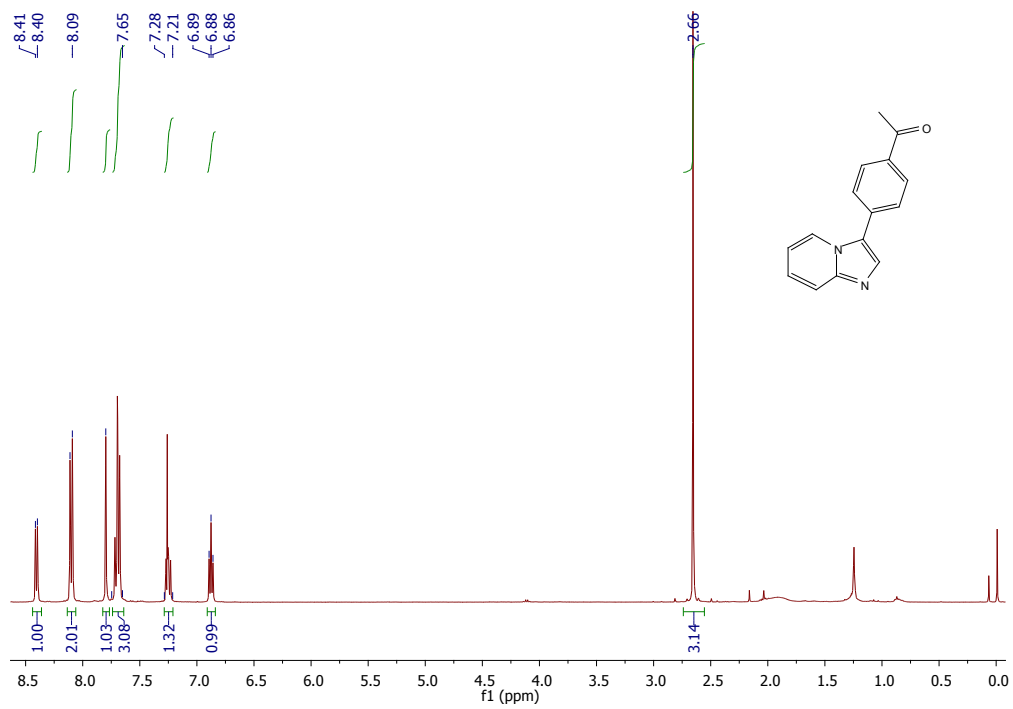

$^1\text{H}$  NMR spectrum of **3j**

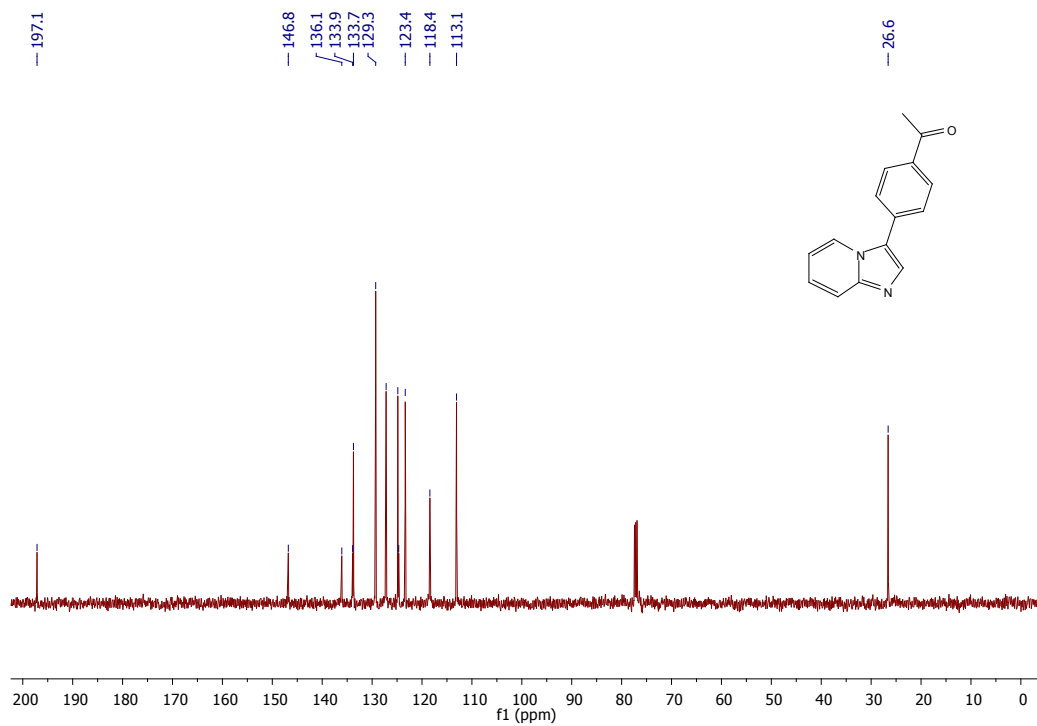

$^{13}\text{C}$  NMR spectrum of **3j**

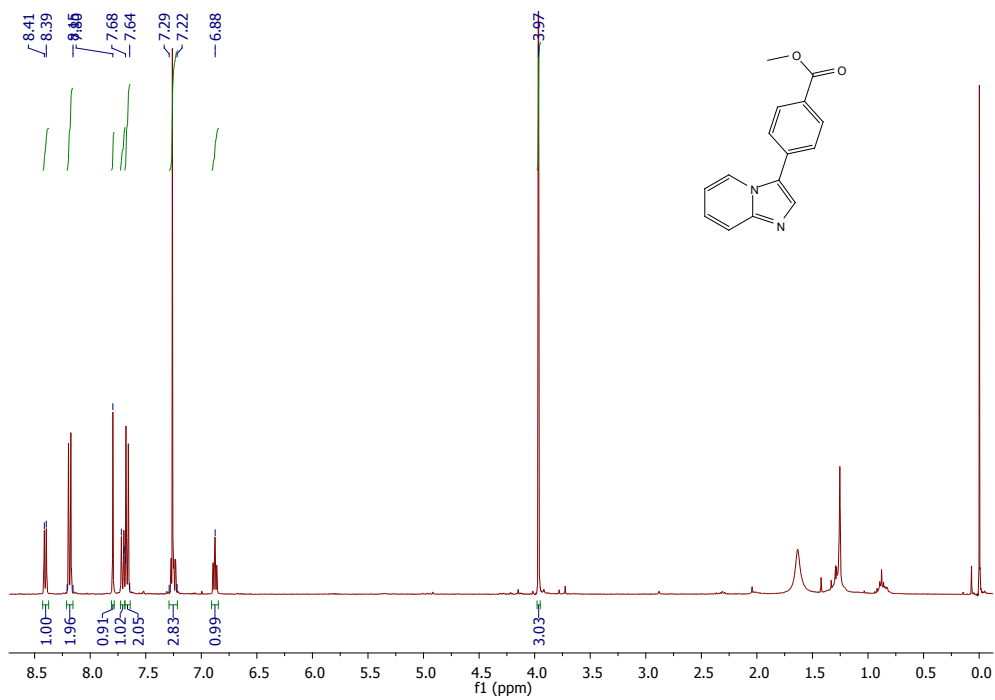

$^1\text{H}$  NMR spectrum of **3k**

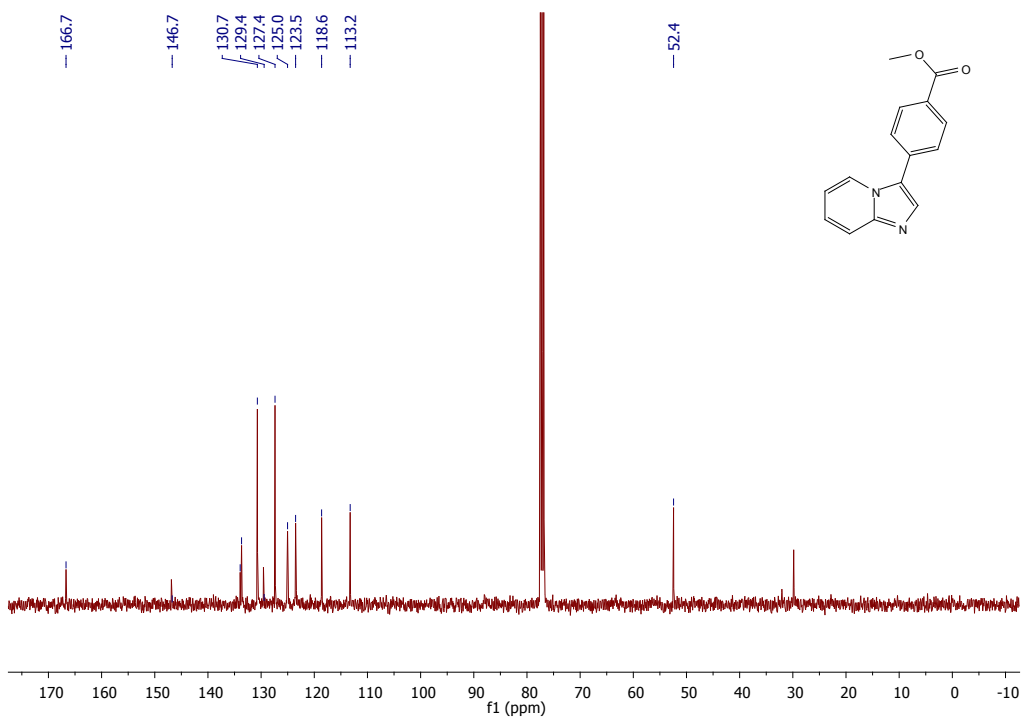

$^{13}\text{C}$  NMR spectrum of **3k**

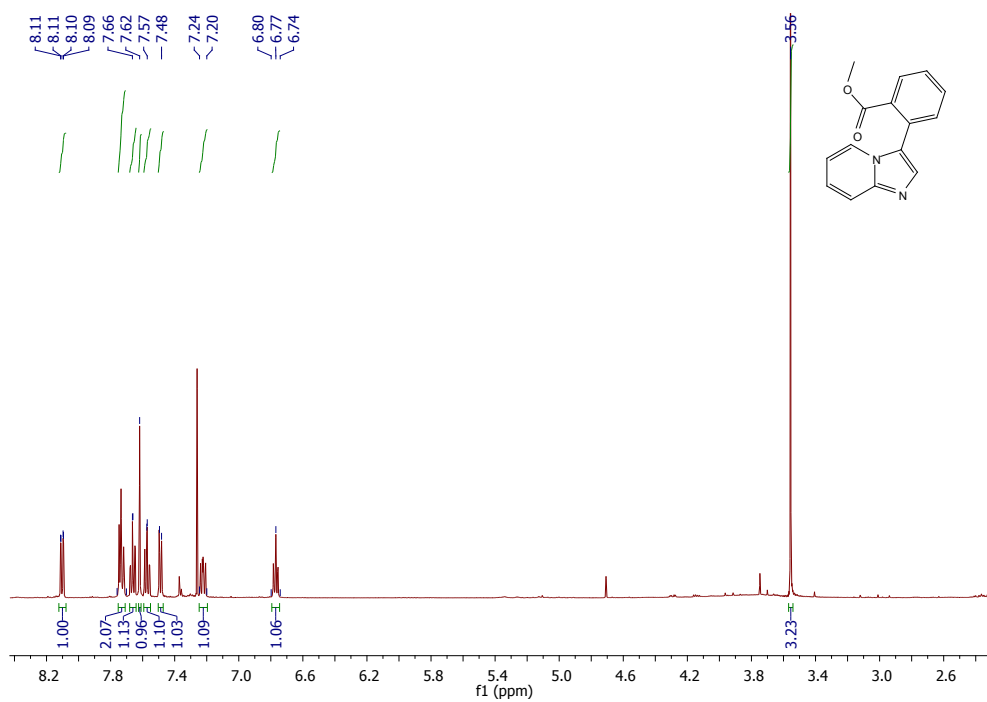

$^1\text{H}$  NMR spectrum of **31**

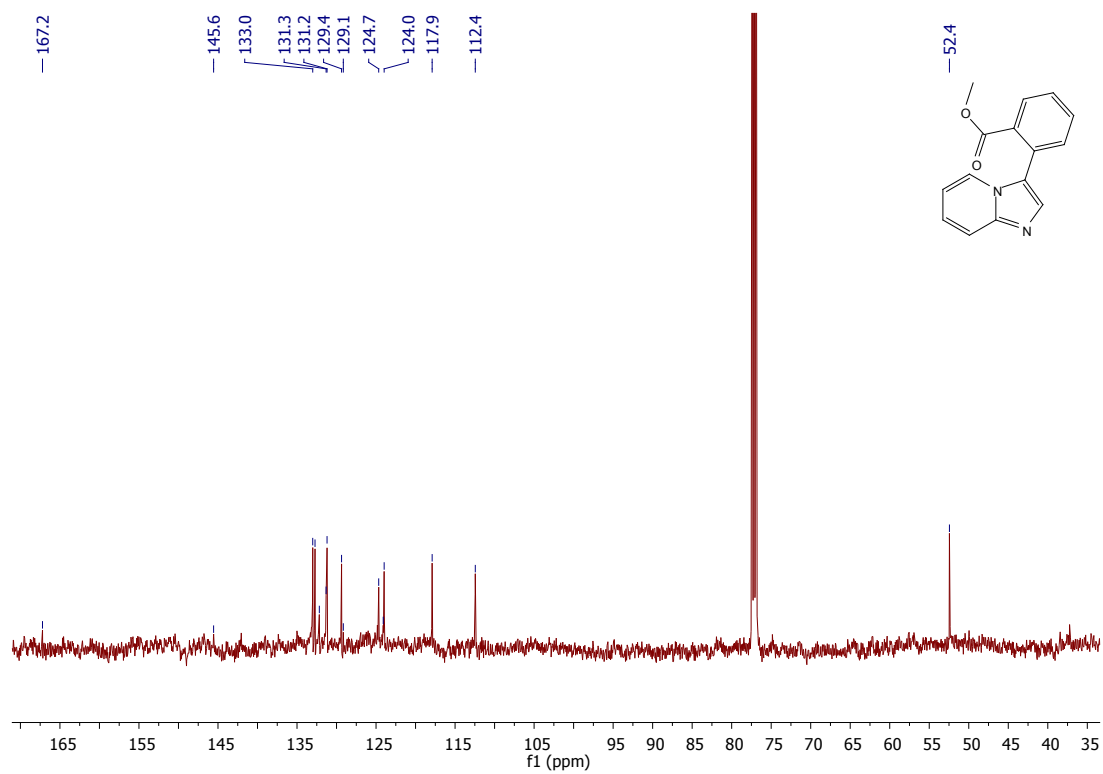

$^{13}\text{C}$  NMR spectrum of **31**

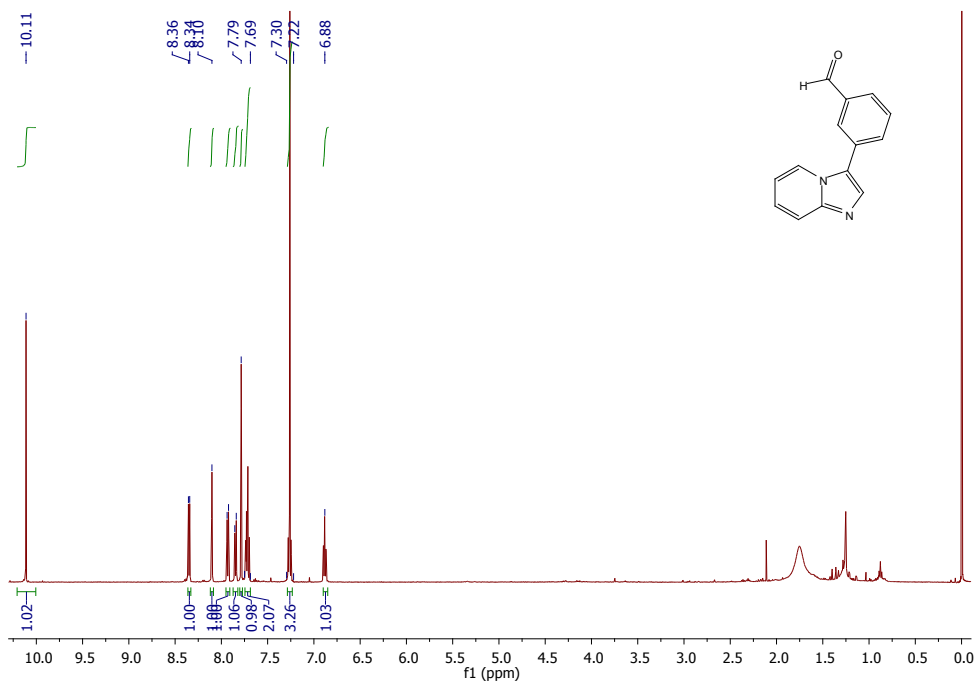

$^1\text{H}$  NMR spectrum of **3m**

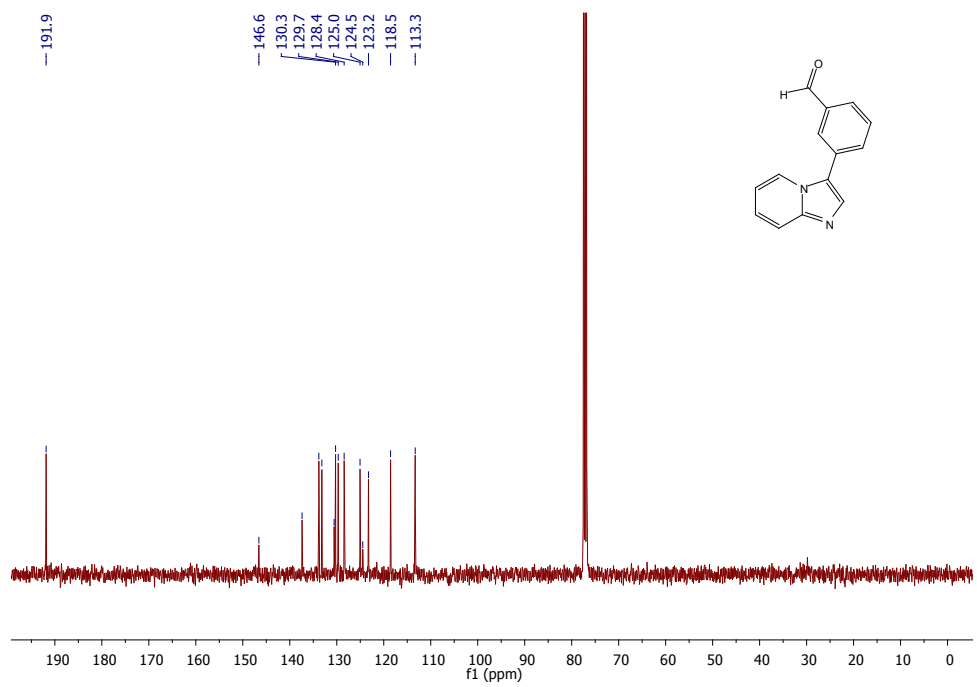

$^{13}\text{C}$  NMR spectrum of **3m**

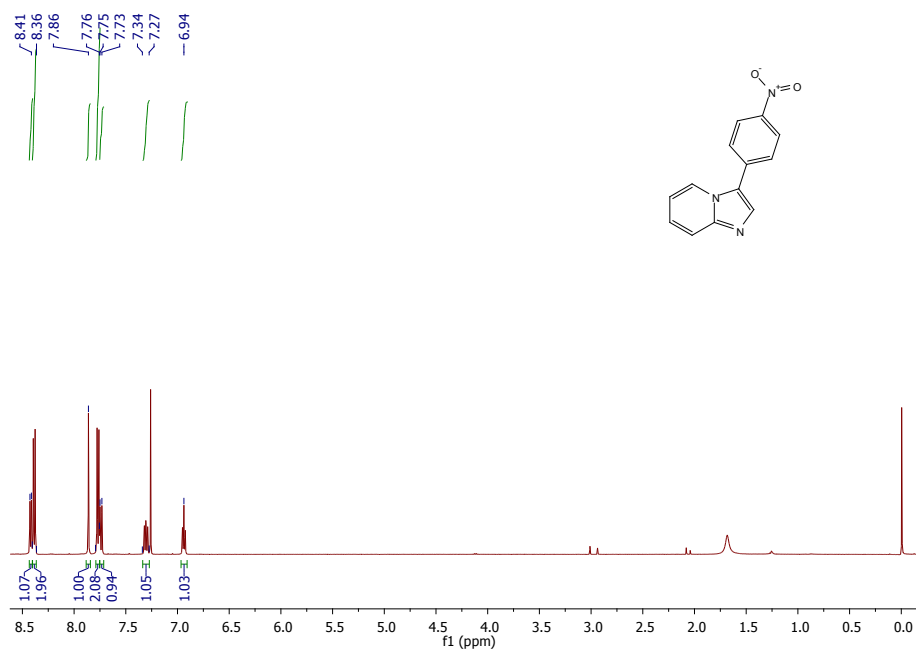

<sup>1</sup>H NMR spectrum of **3n**

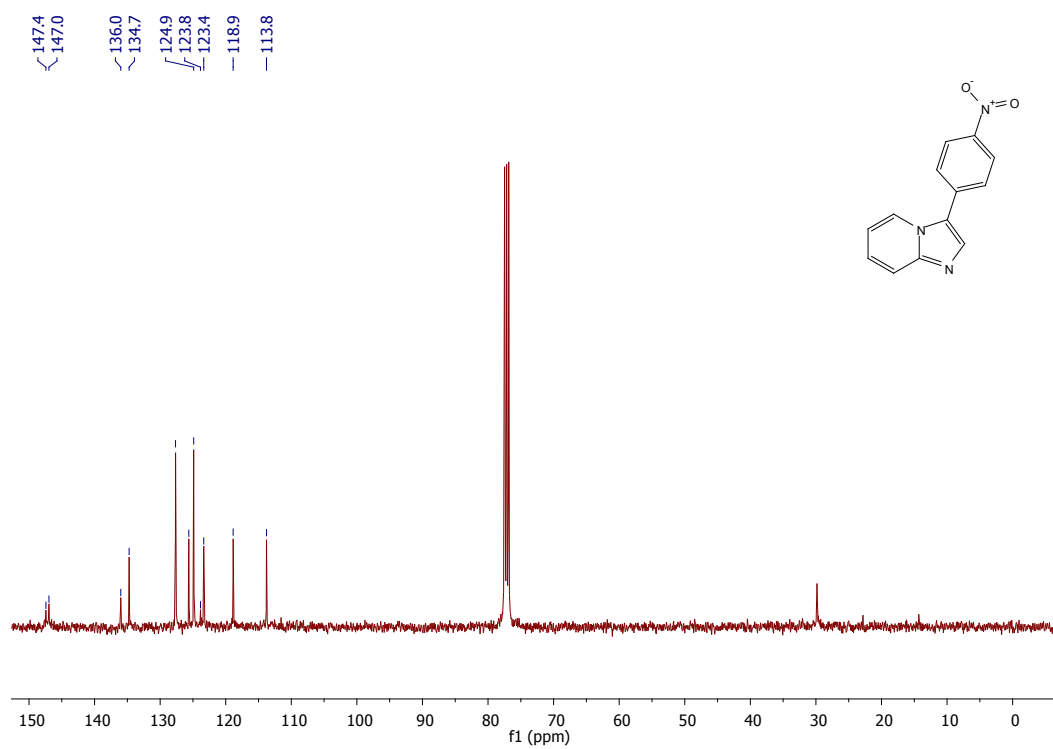

<sup>13</sup>C NMR spectrum of **3n**

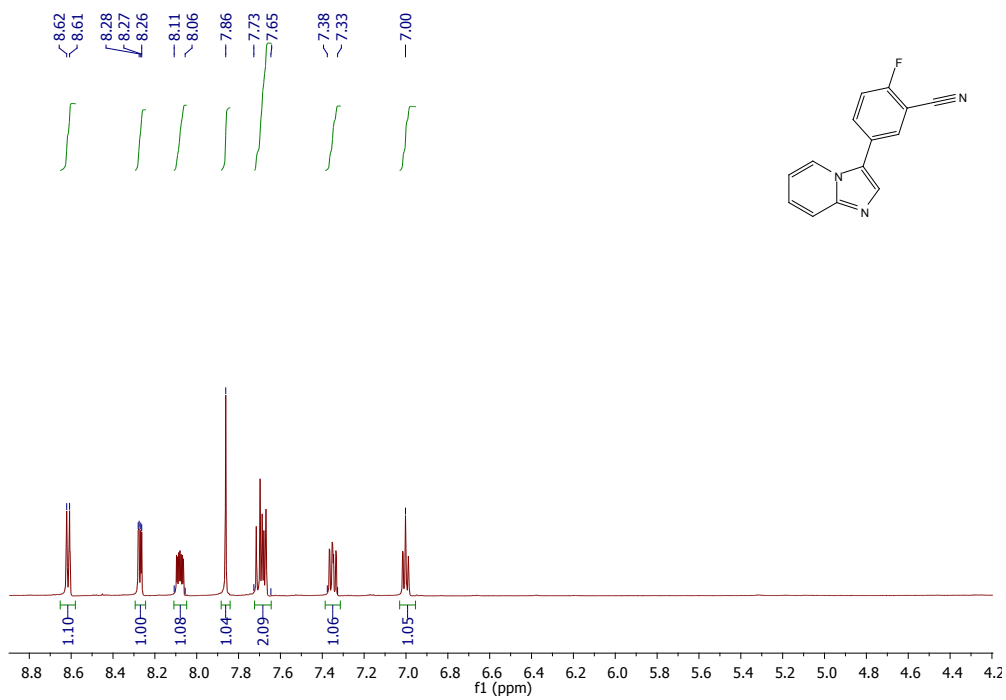

$^1\text{H}$  NMR spectrum of **3o**

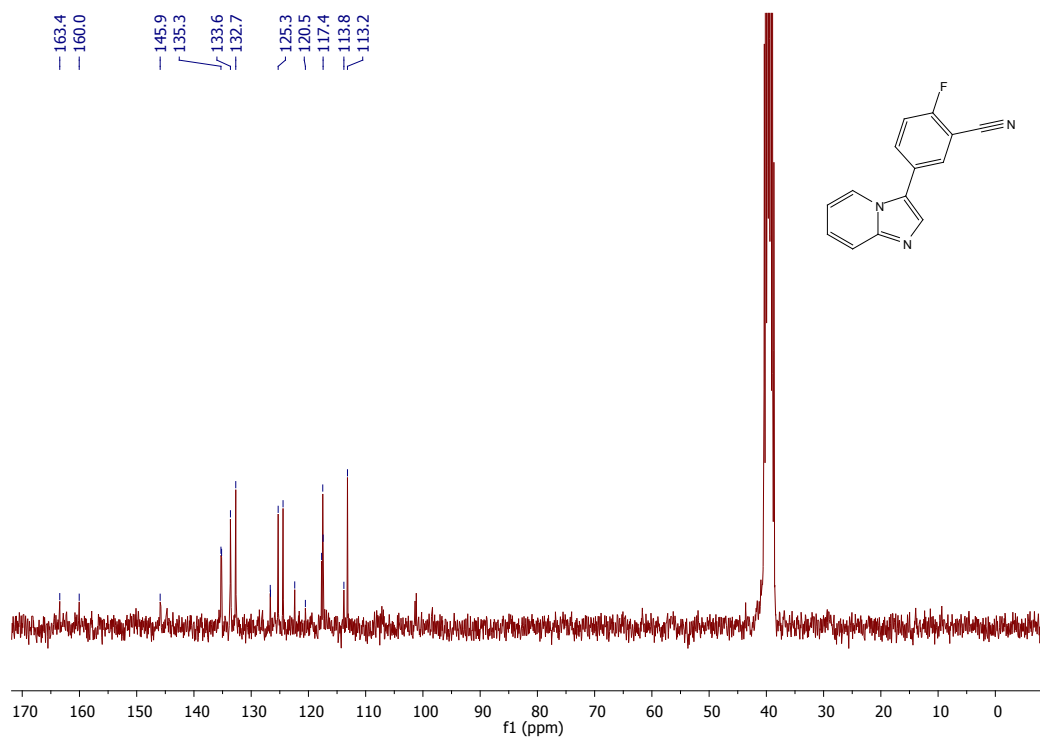

$^{13}\text{C}$  NMR spectrum of **3o**

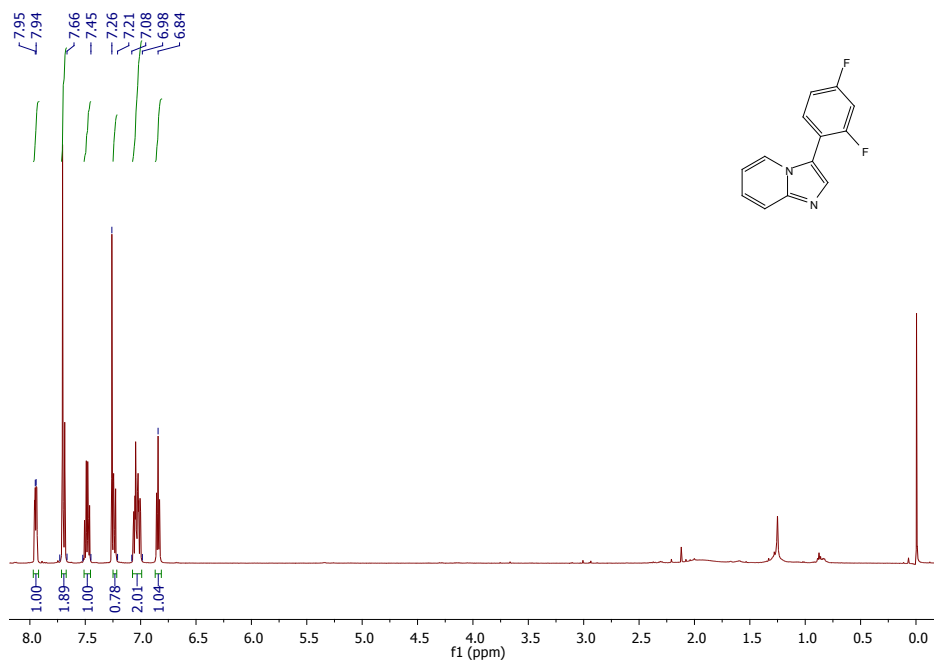

$^1\text{H}$  NMR spectrum of **3p**

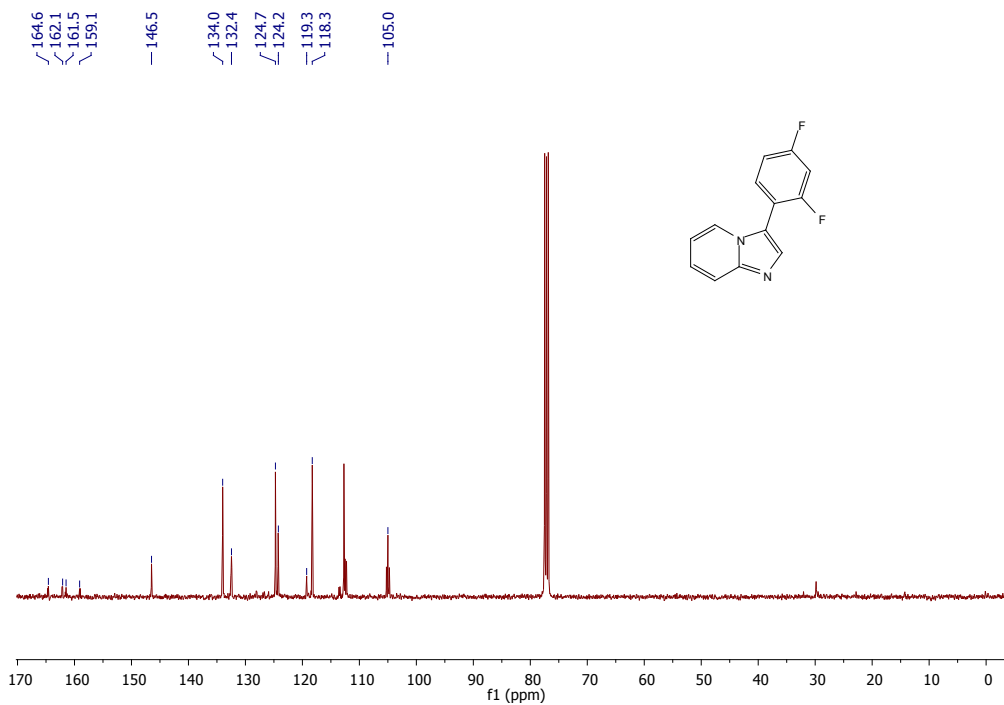

$^{13}\text{C}$  NMR spectrum of **3p**

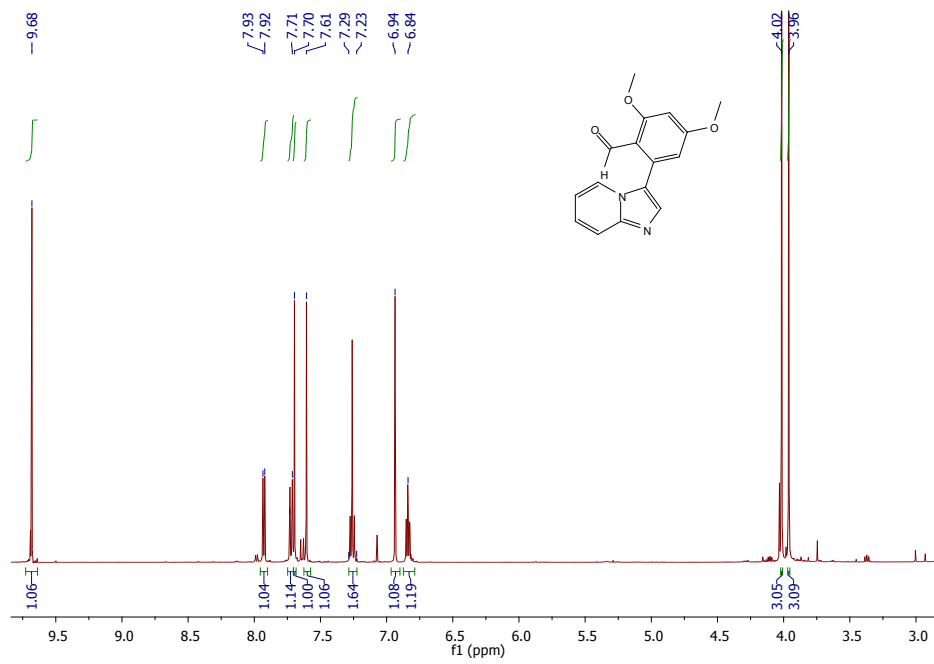

$^1\text{H}$  NMR spectrum of **3q**

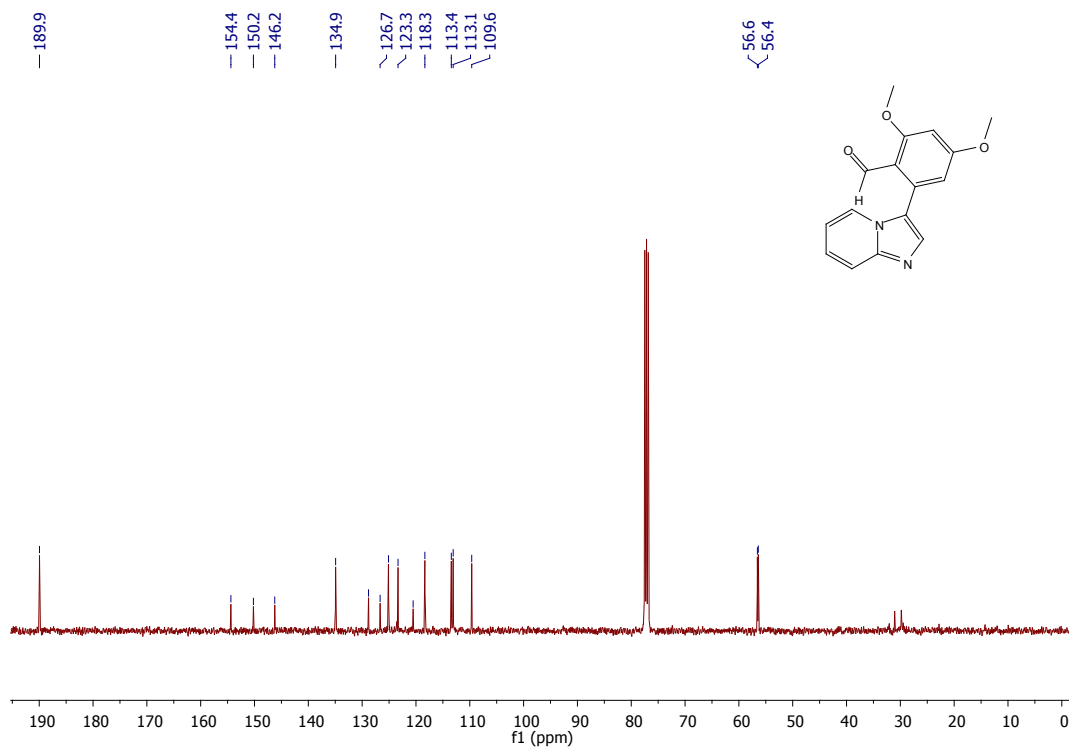

$^{13}\text{C}$  NMR spectrum of **3q**



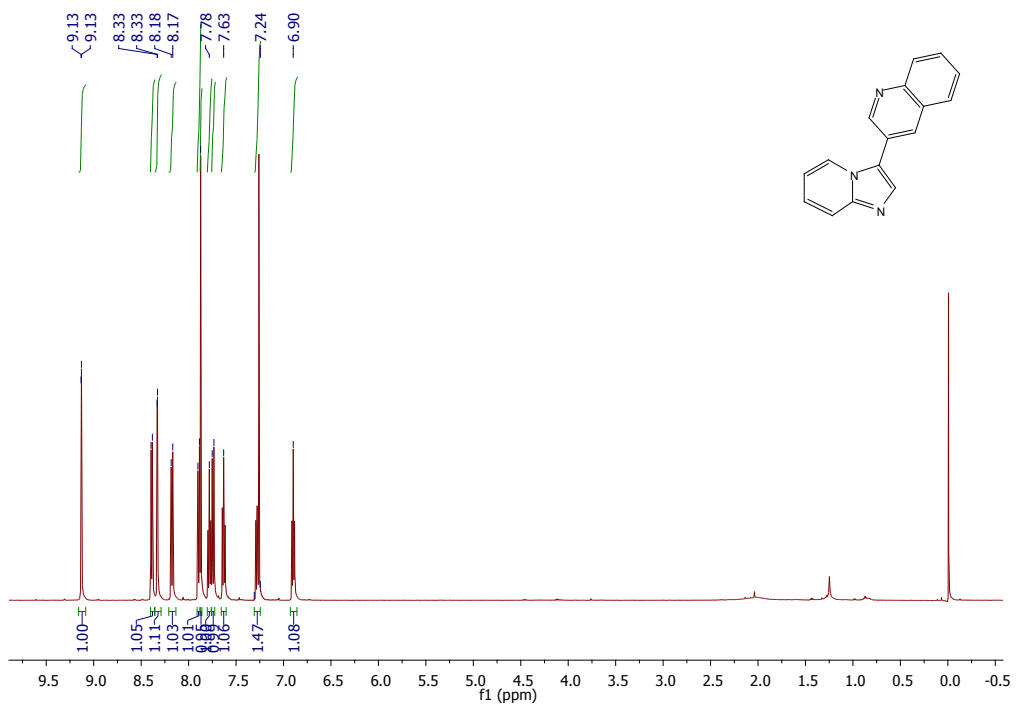

<sup>1</sup>H NMR spectrum of **3r**

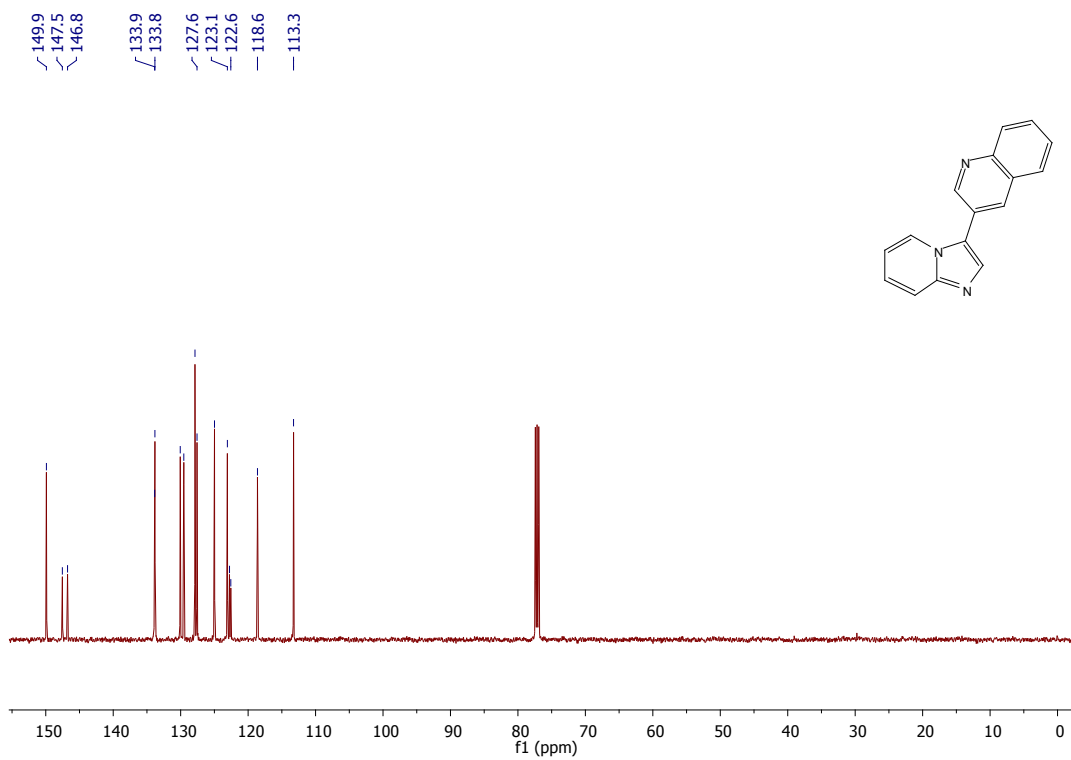

<sup>13</sup>C NMR spectrum of **3r**

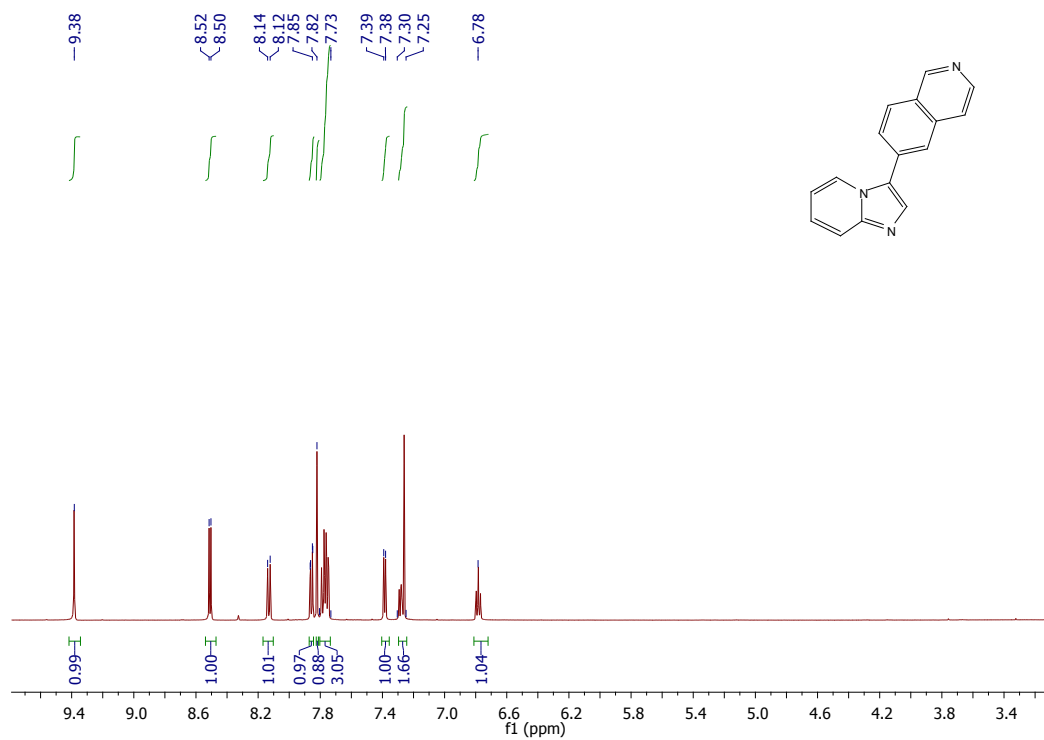

$^1\text{H}$  NMR spectrum of **3s**

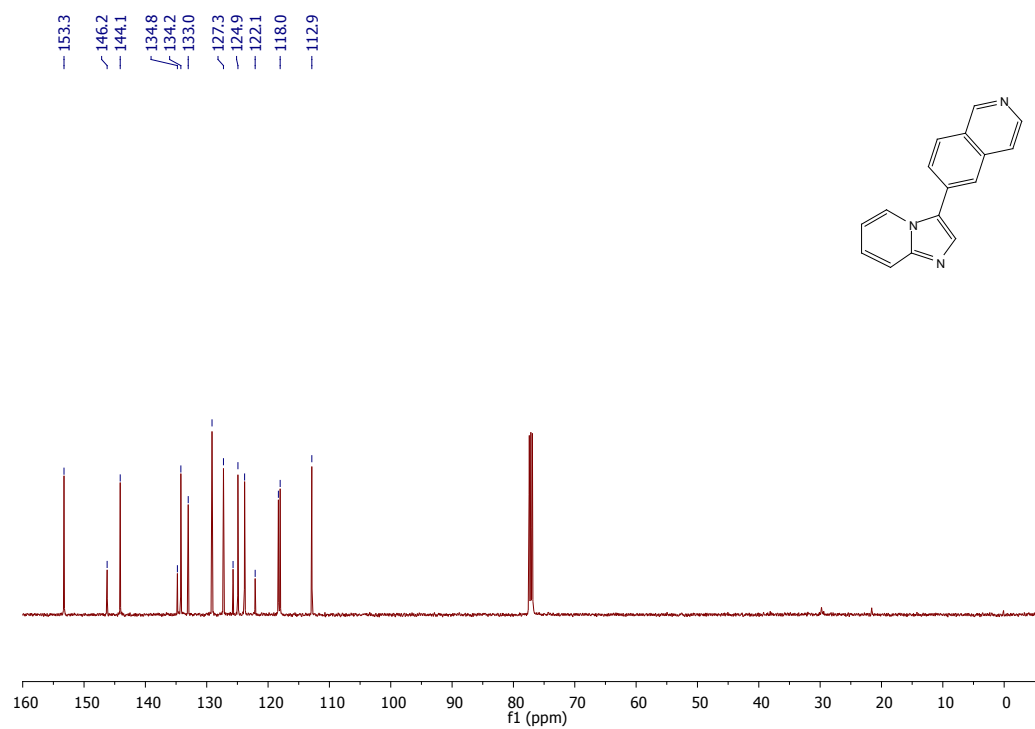

$^{13}\text{C}$  NMR spectrum of **3s**

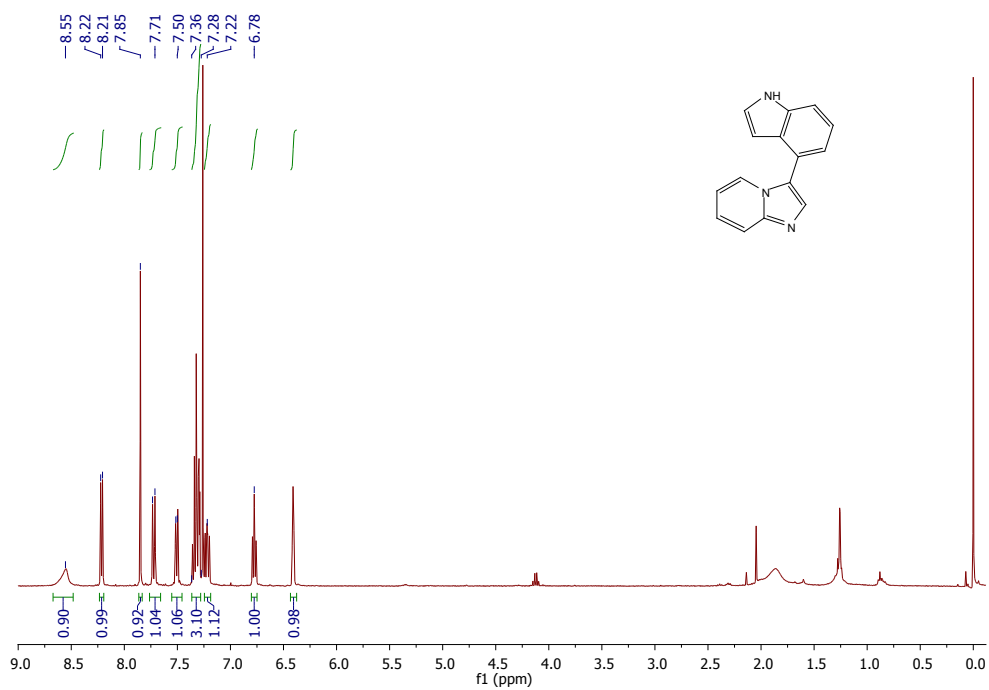

$^1\text{H}$  NMR spectrum of **3t**

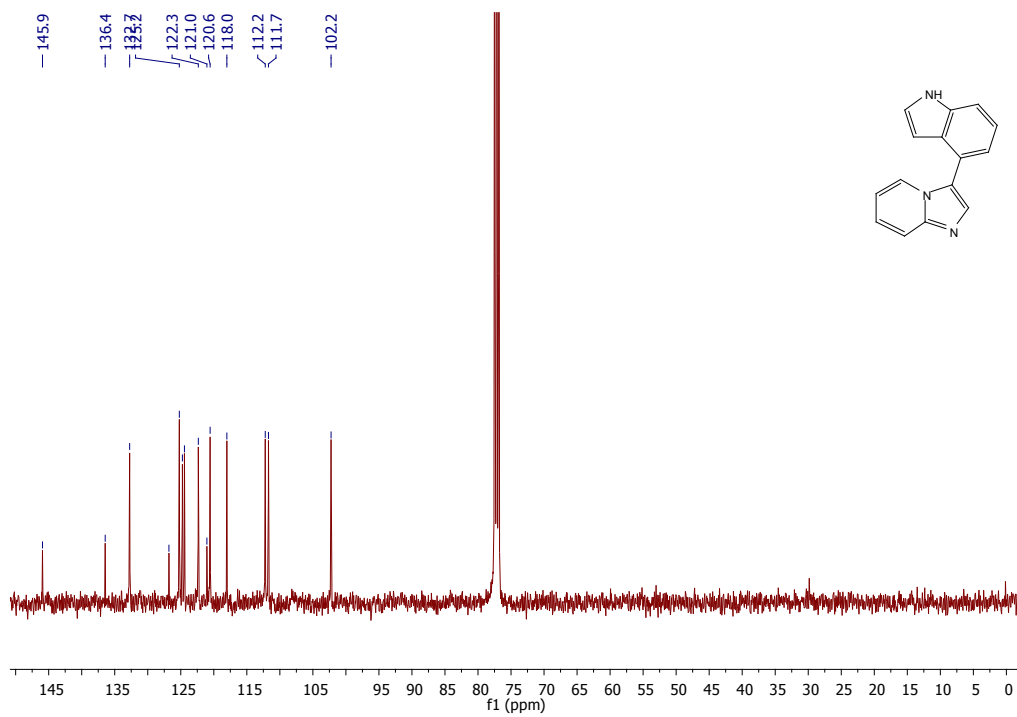

$^{13}\text{C}$  NMR spectrum of **3t**

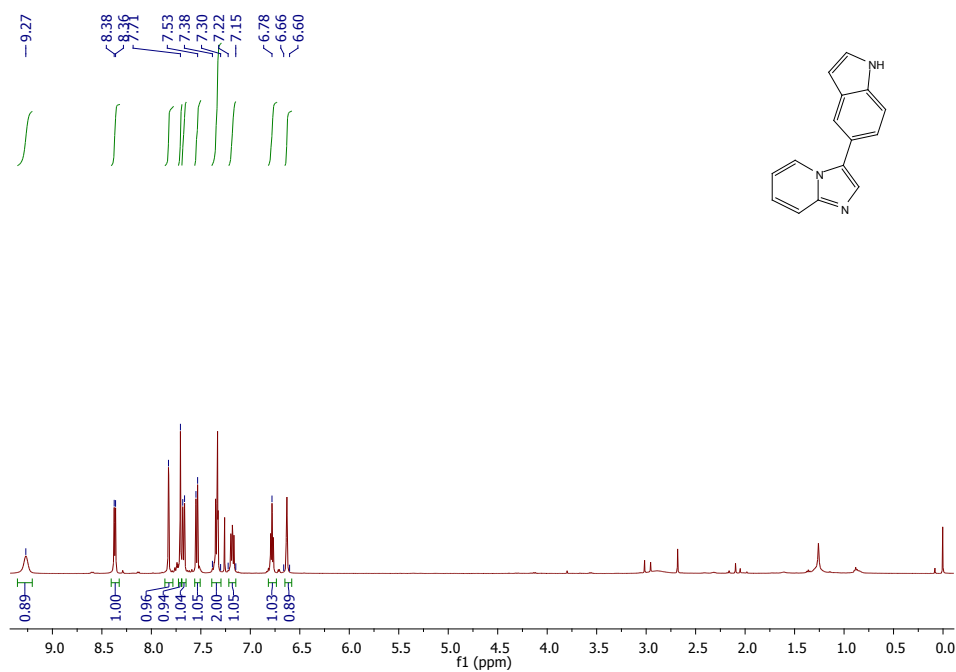

$^1\text{H}$  NMR spectrum of **3u**

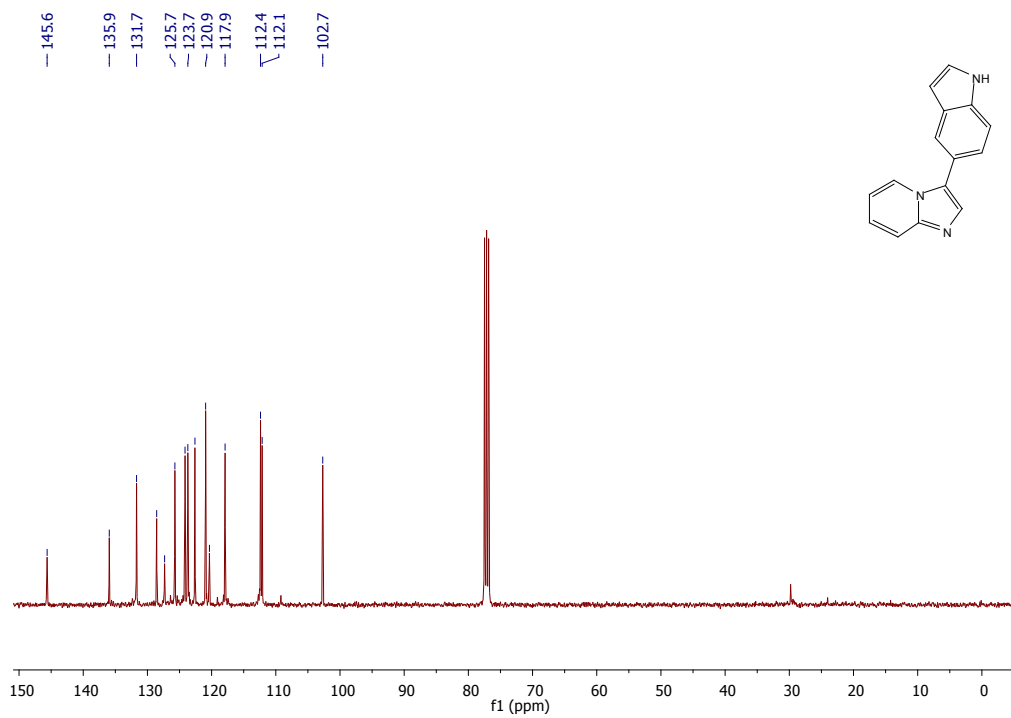

$^{13}\text{C}$  NMR spectrum of **3u**

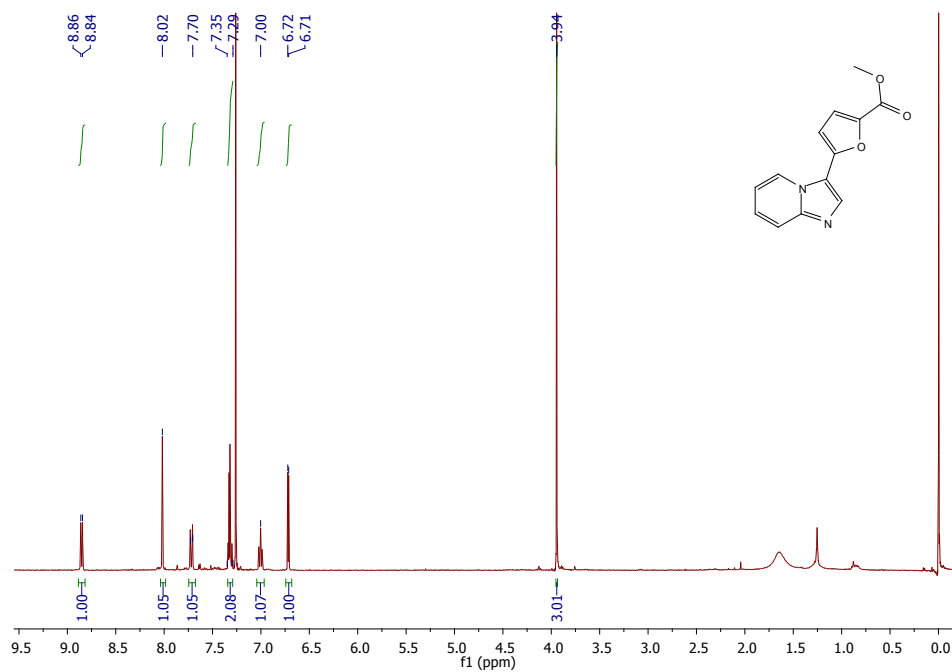

$^1\text{H}$  NMR spectrum of **3v**

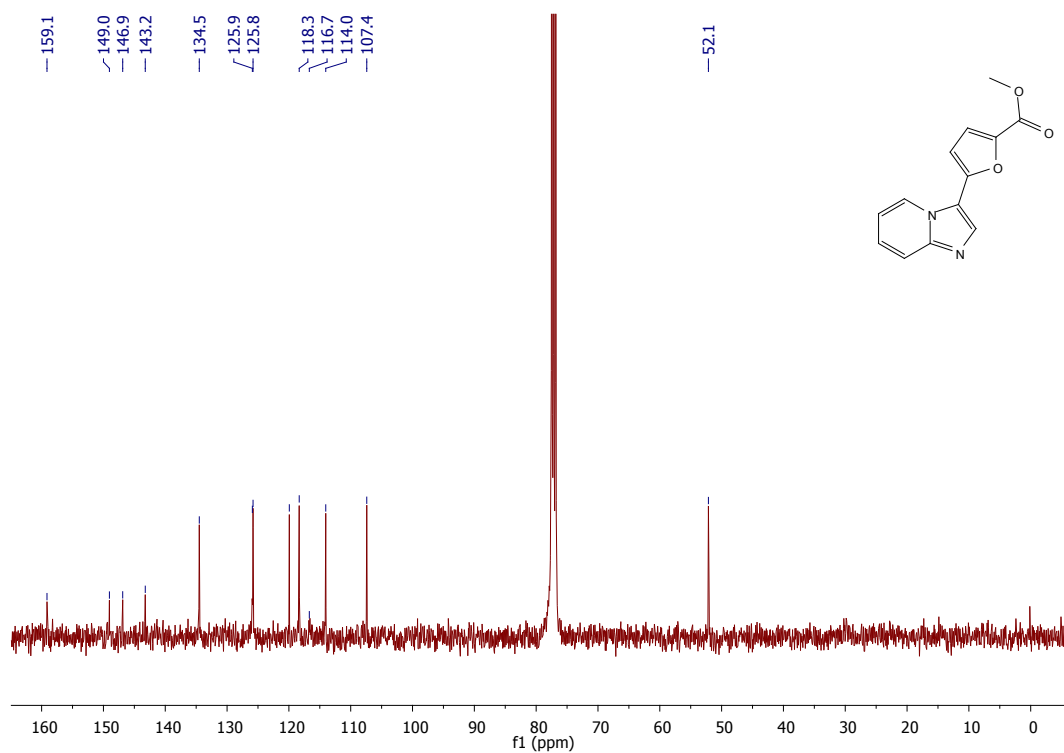

$^{13}\text{C}$  NMR spectrum of **3v**

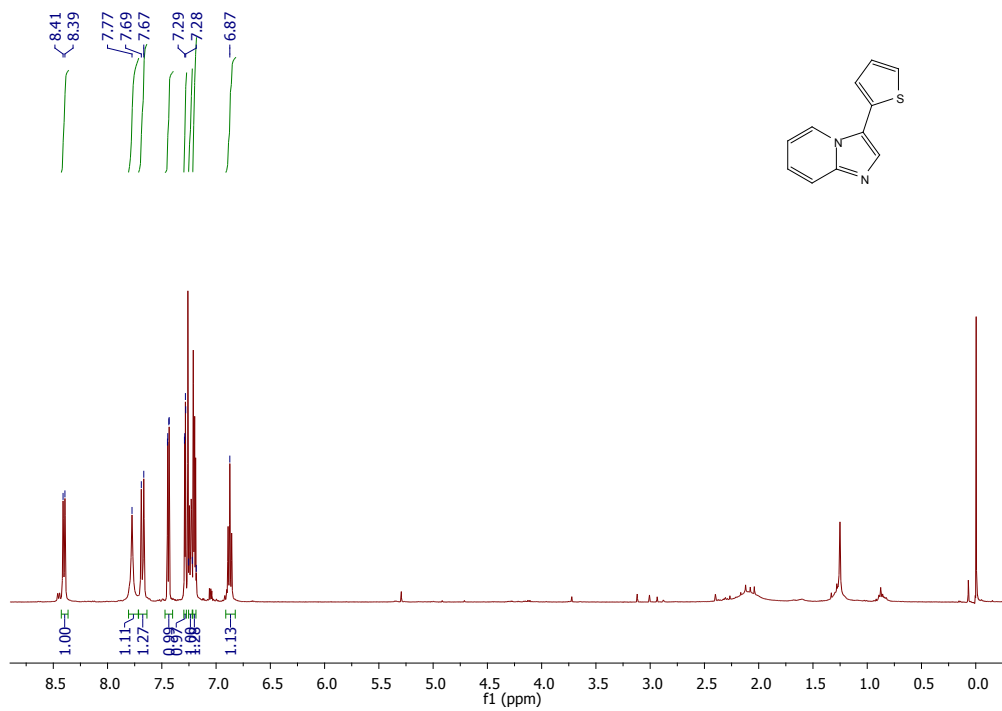

<sup>1</sup>H NMR spectrum of **3w**

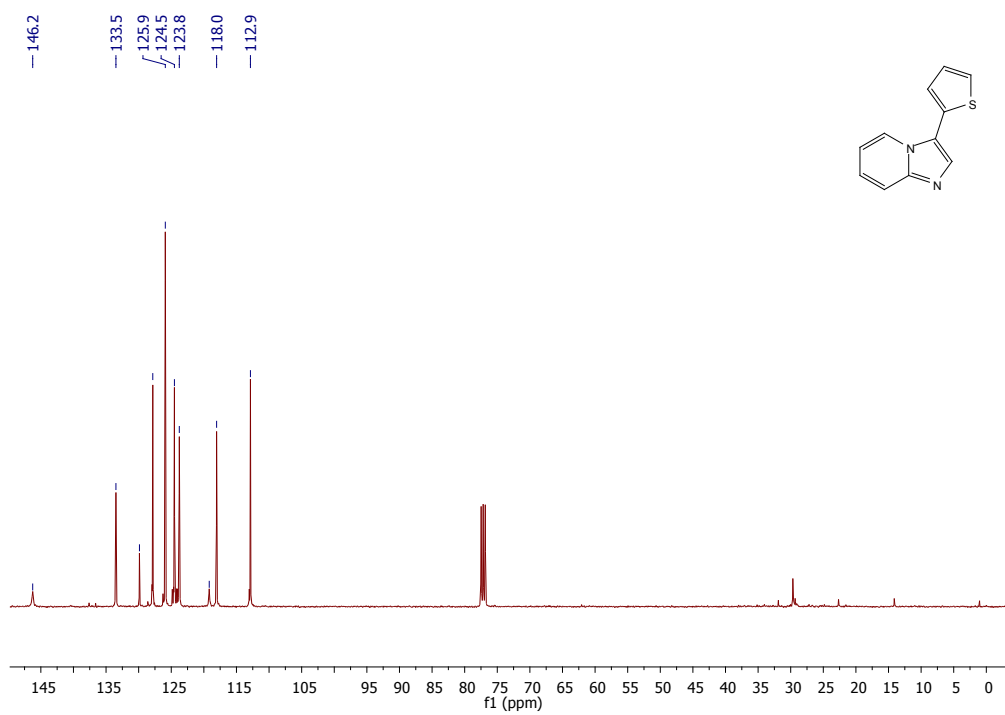

<sup>13</sup>C NMR spectrum of **3w**

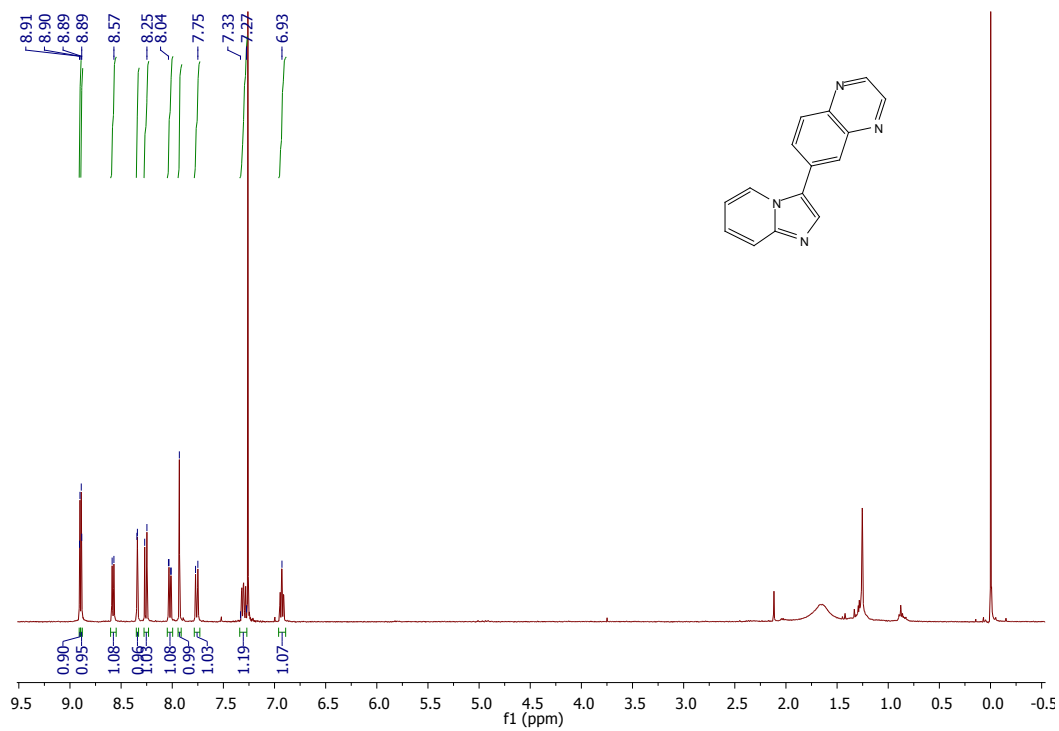

$^1\text{H}$  NMR spectrum of **3x**

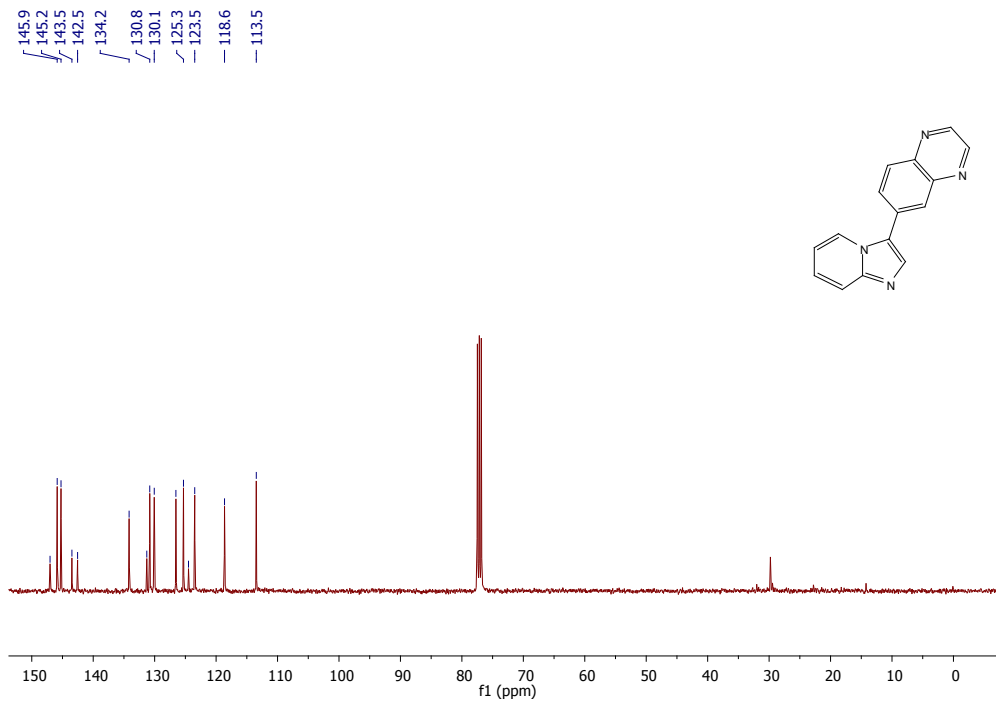

$^{13}\text{C}$  NMR spectrum of **3x**

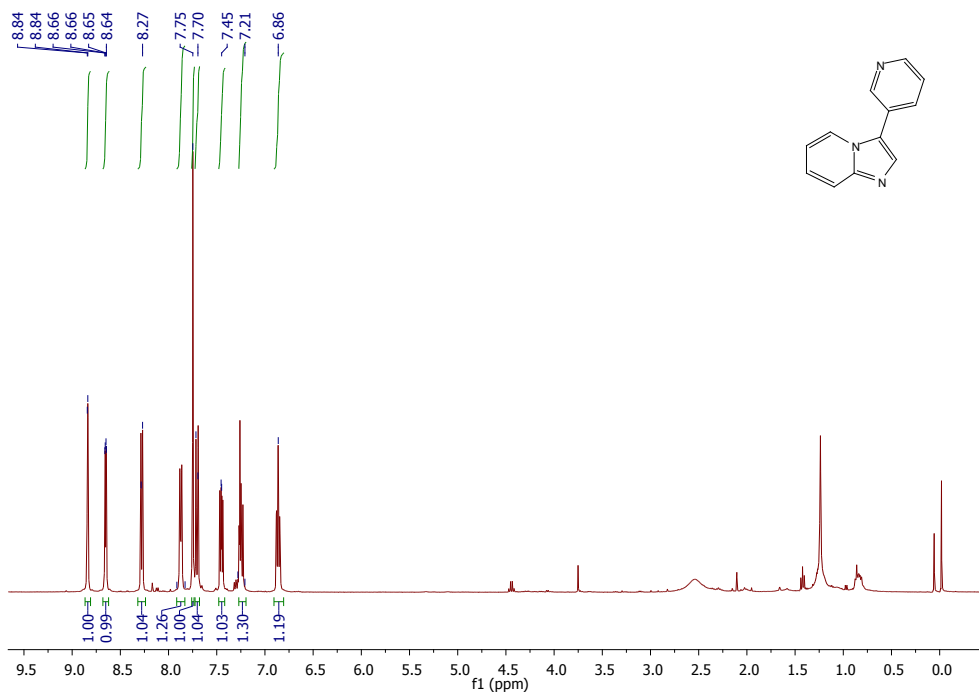

$^1\text{H}$  NMR spectrum of **3y**

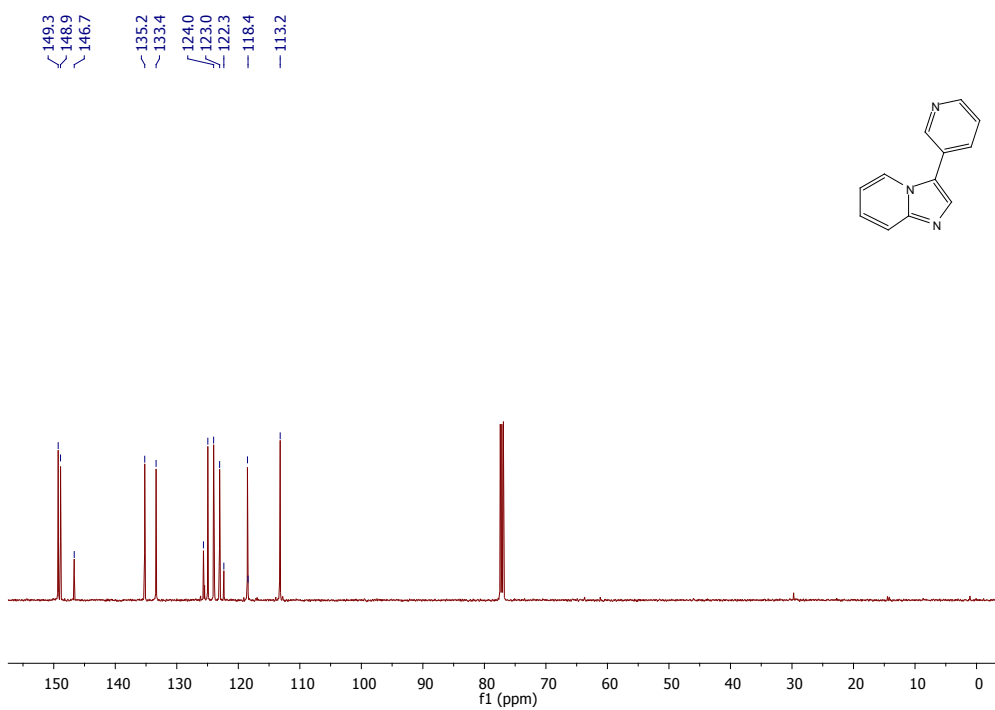

$^{13}\text{C}$  NMR spectrum of **3y**



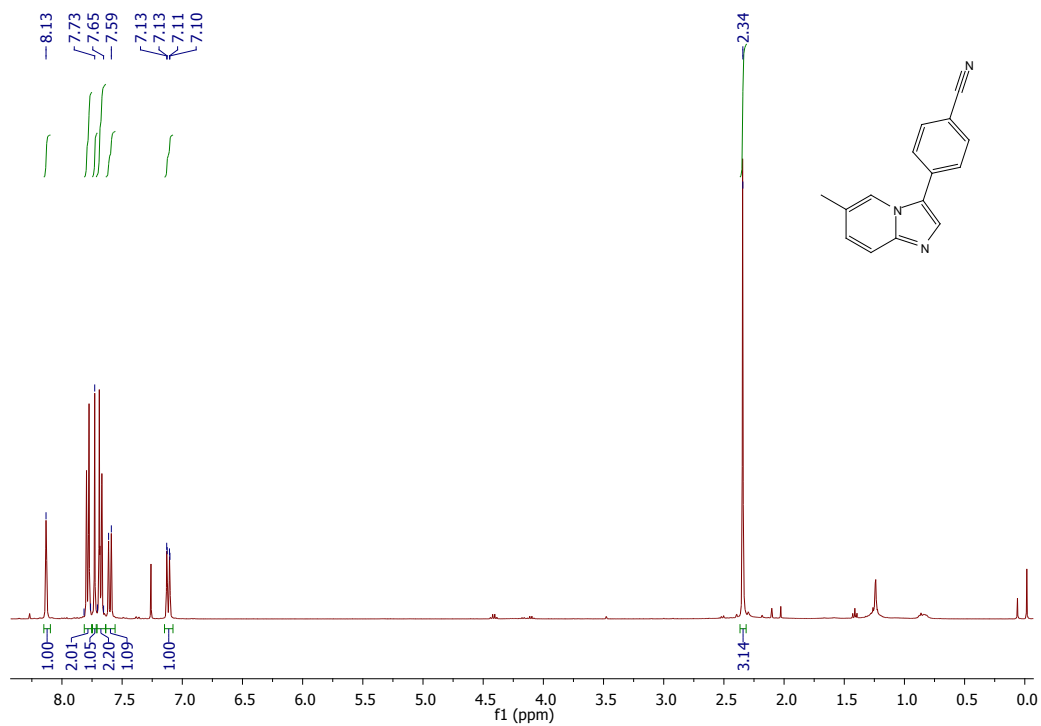

$^1\text{H}$  NMR spectrum of **4a**

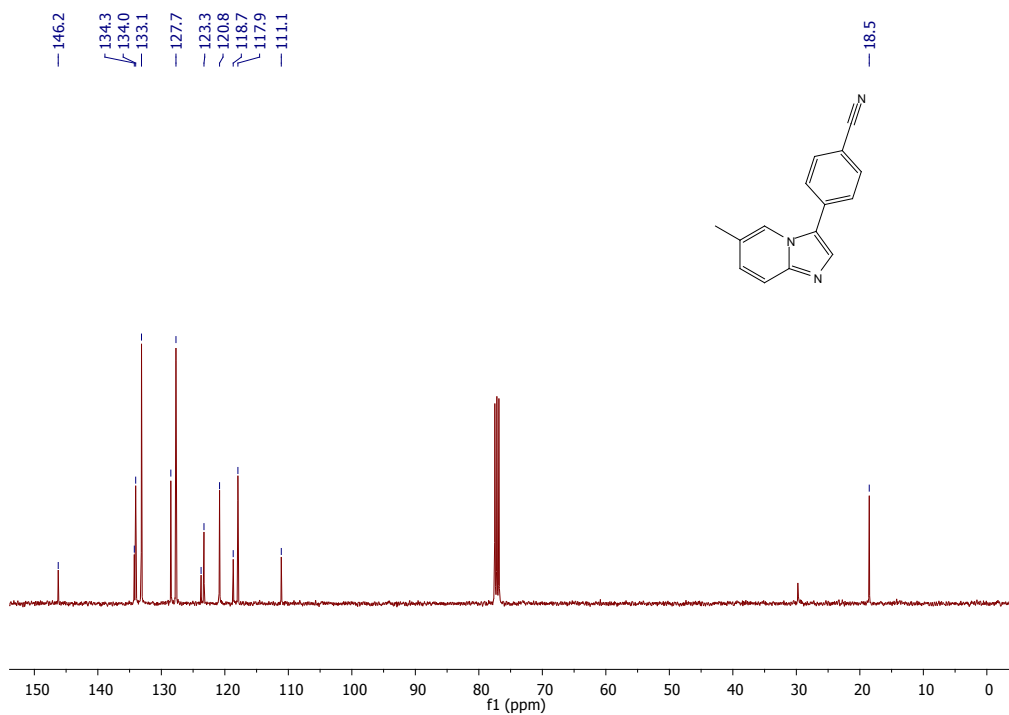

$^{13}\text{C}$  NMR spectrum of **4a**

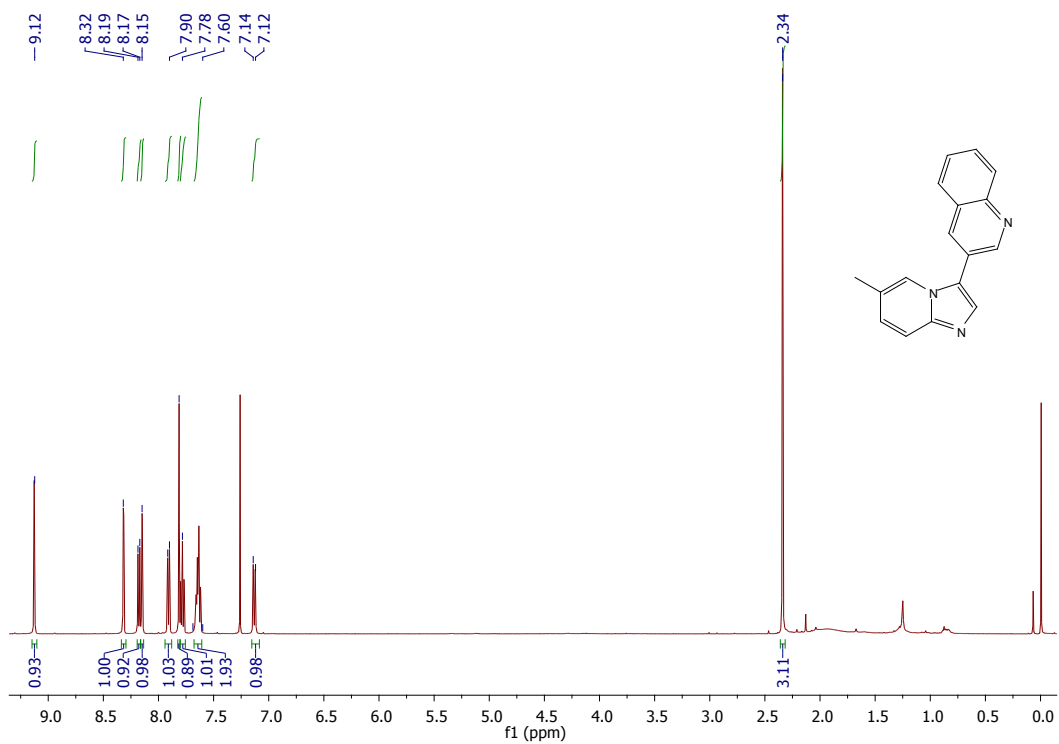

$^1\text{H}$  NMR spectrum of **4b**

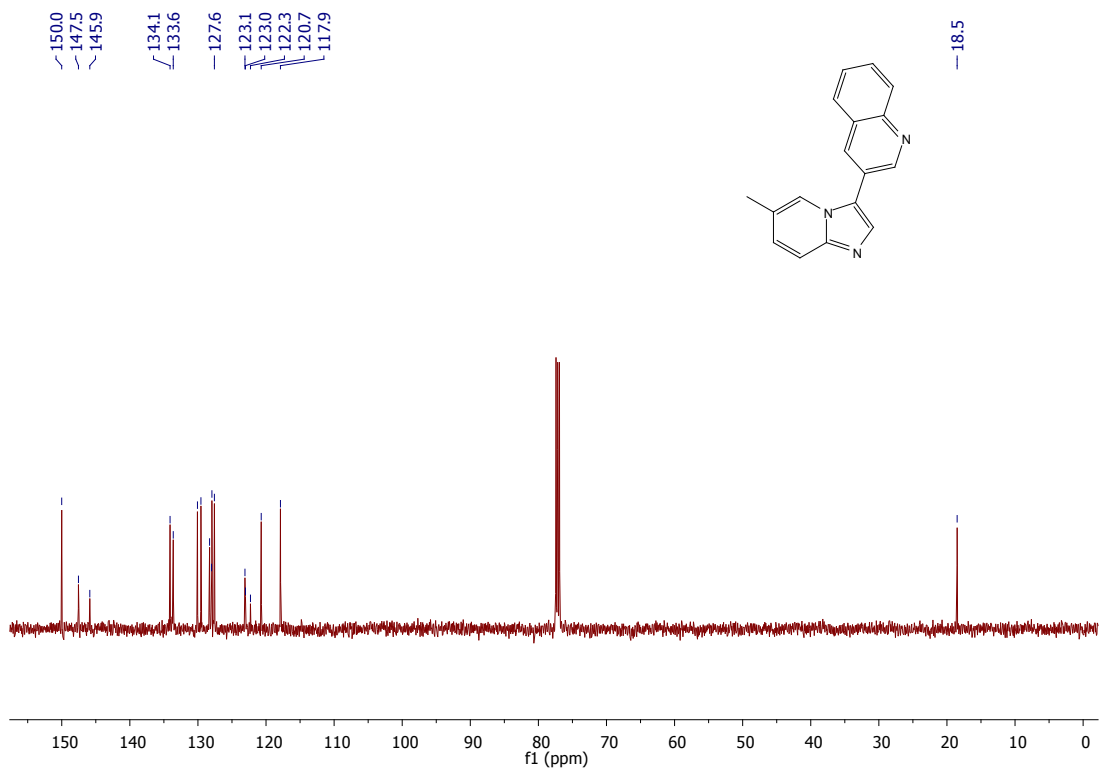

$^{13}\text{C}$  NMR spectrum of **4b**

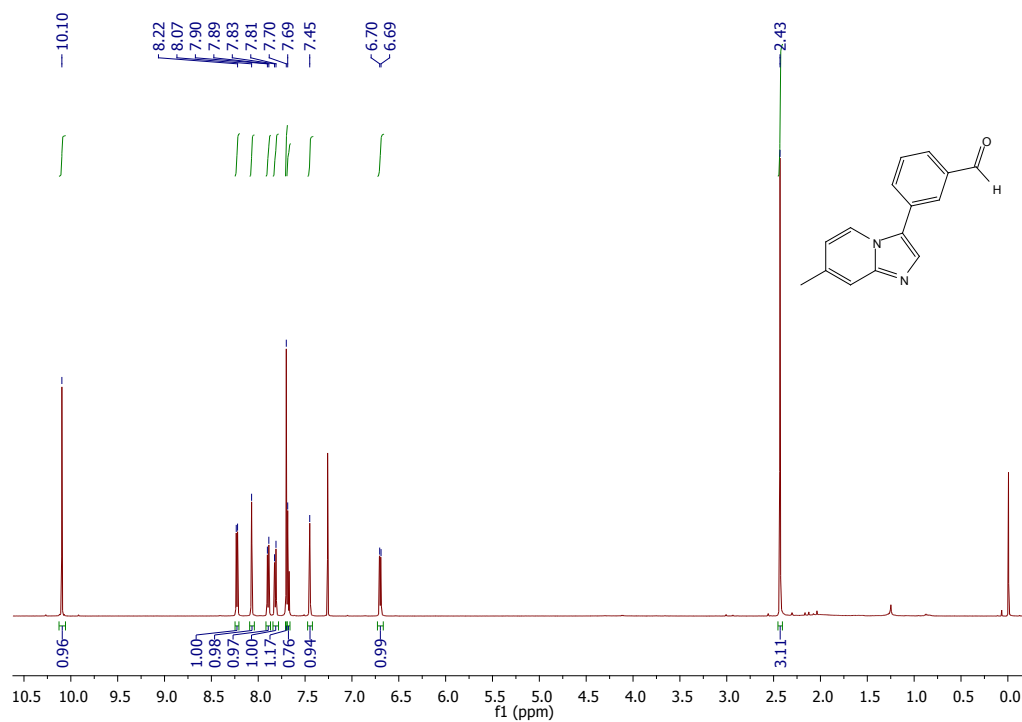

$^1\text{H}$  NMR spectrum of **4c**

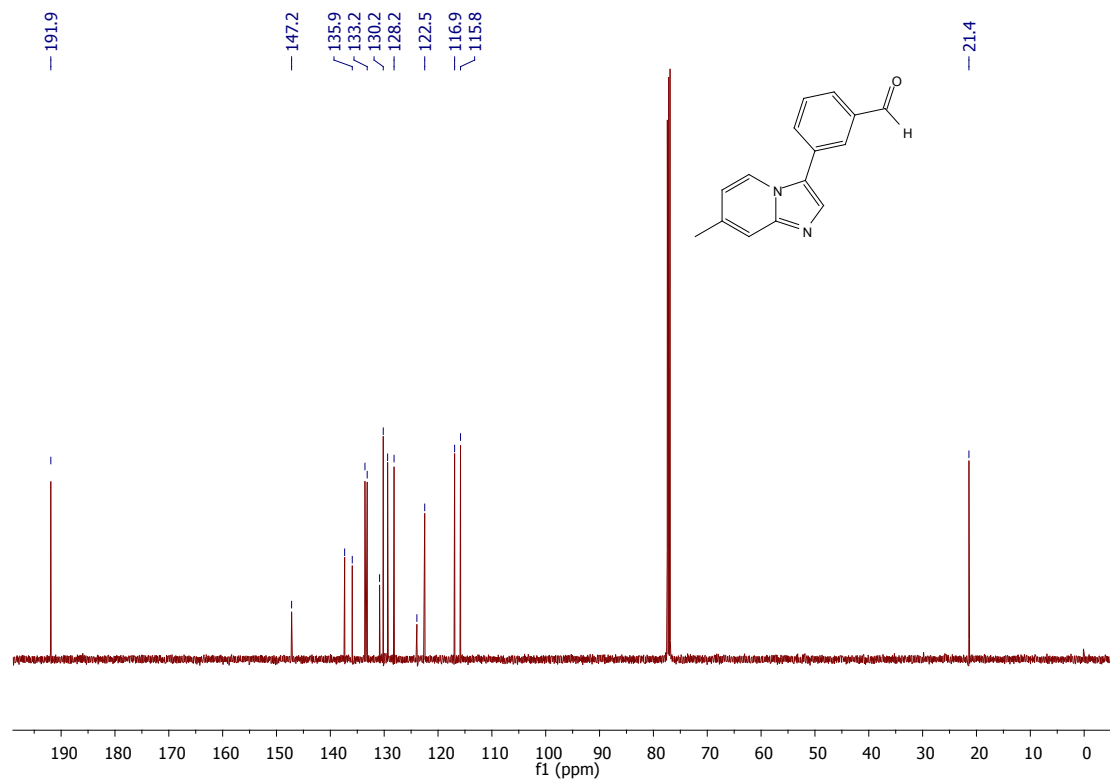

$^{13}\text{C}$  NMR spectrum of **4c**

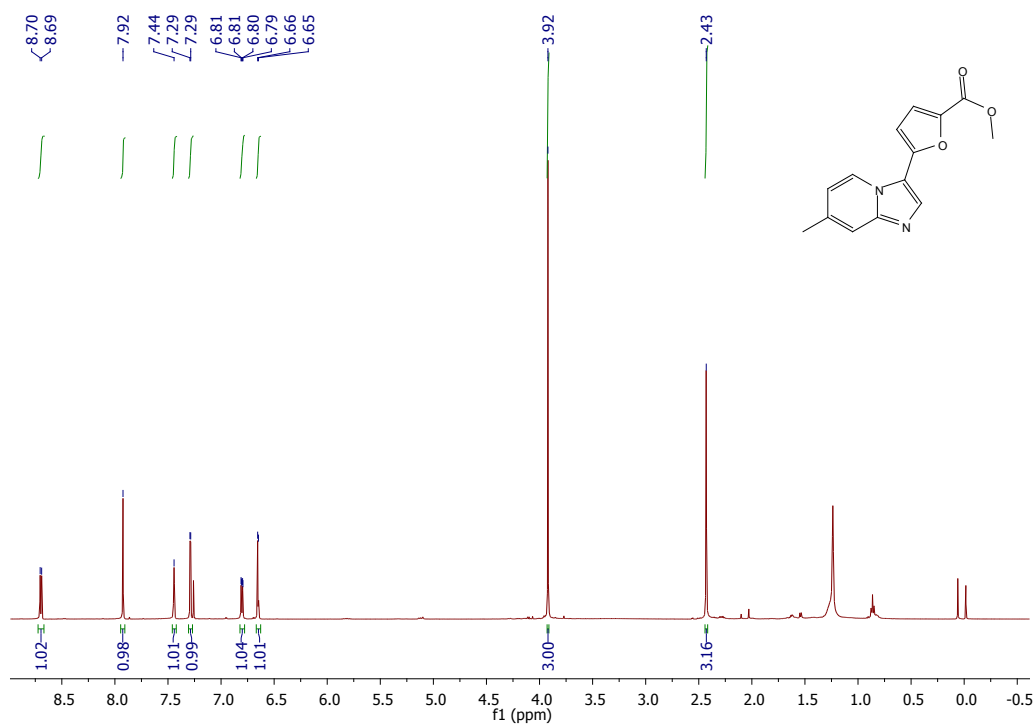

$^1\text{H}$  NMR spectrum of **4d**

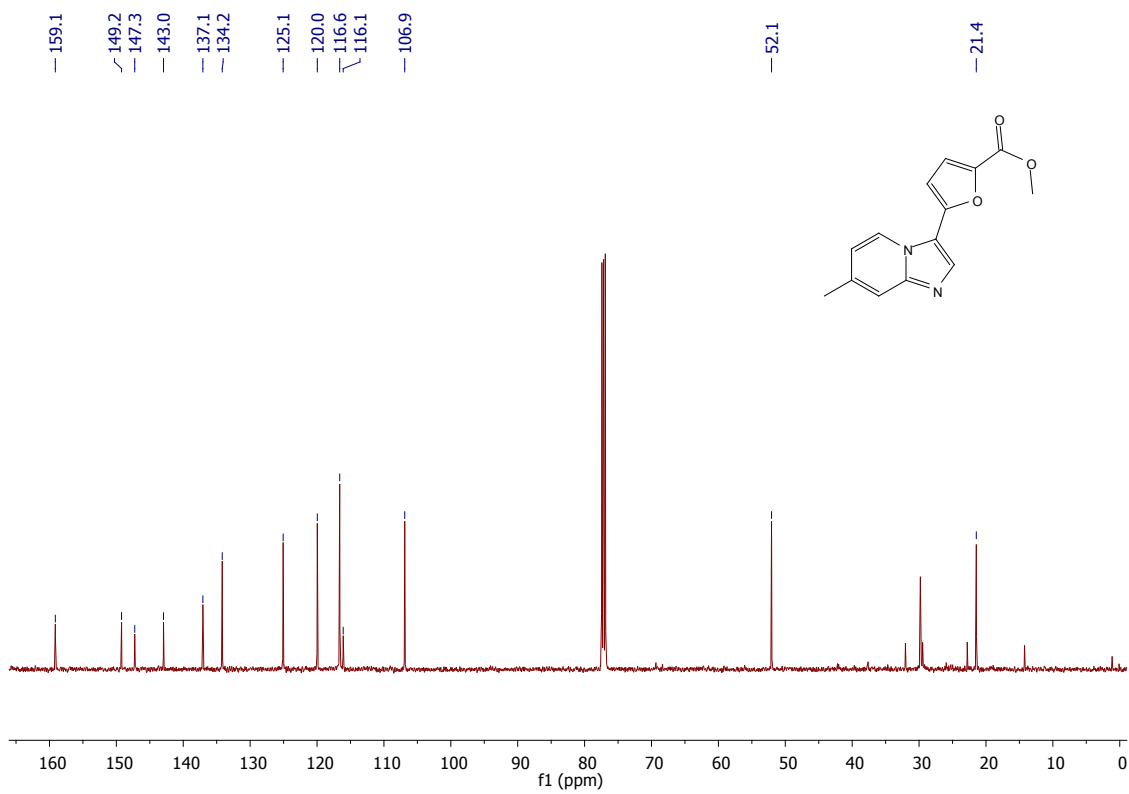

$^{13}\text{C}$  NMR spectrum of **4d**

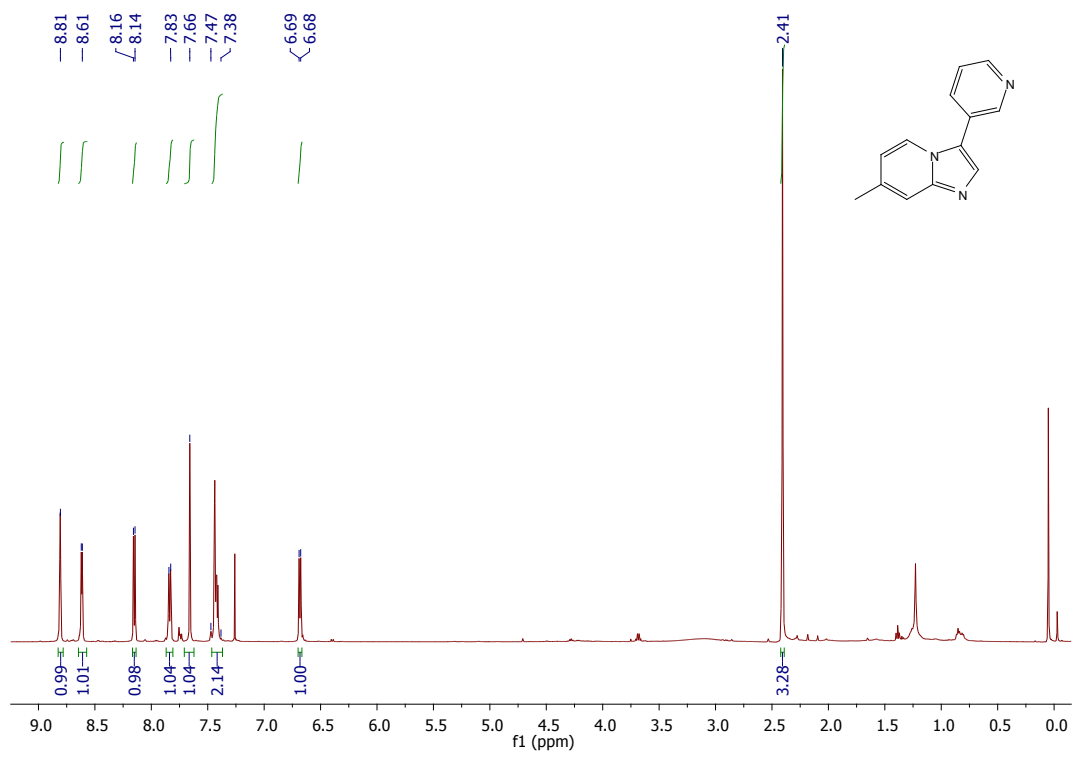

<sup>1</sup>H NMR spectrum of 4e

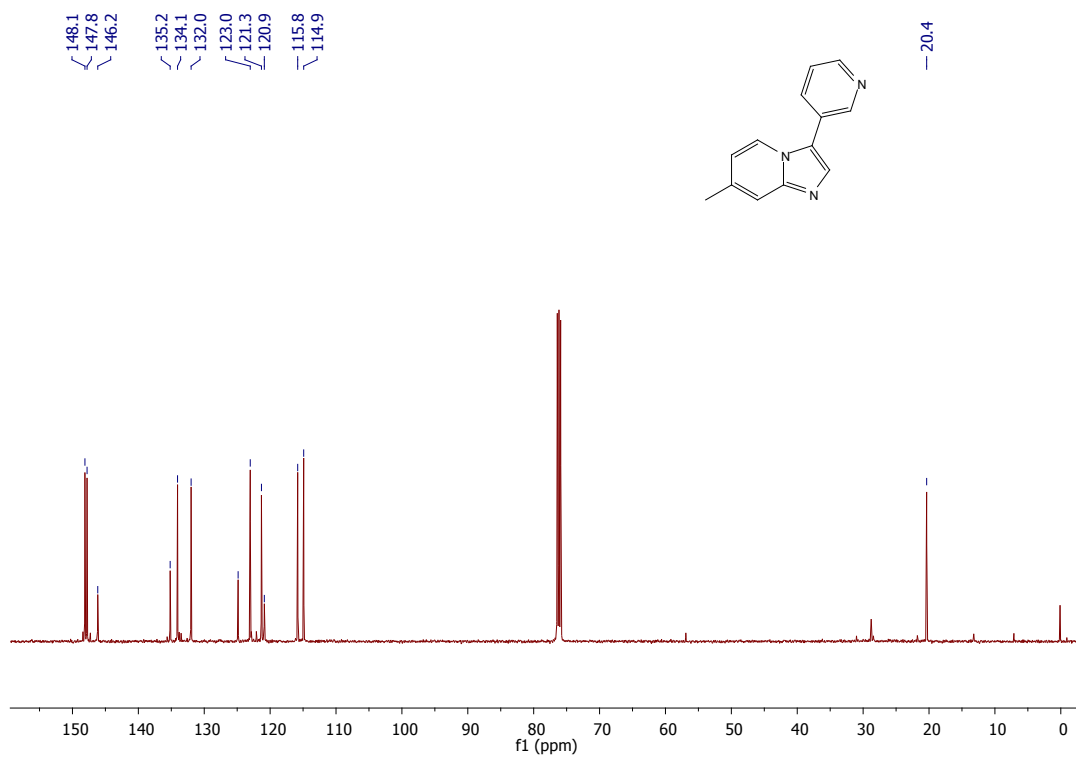

<sup>13</sup>C NMR spectrum of 4e

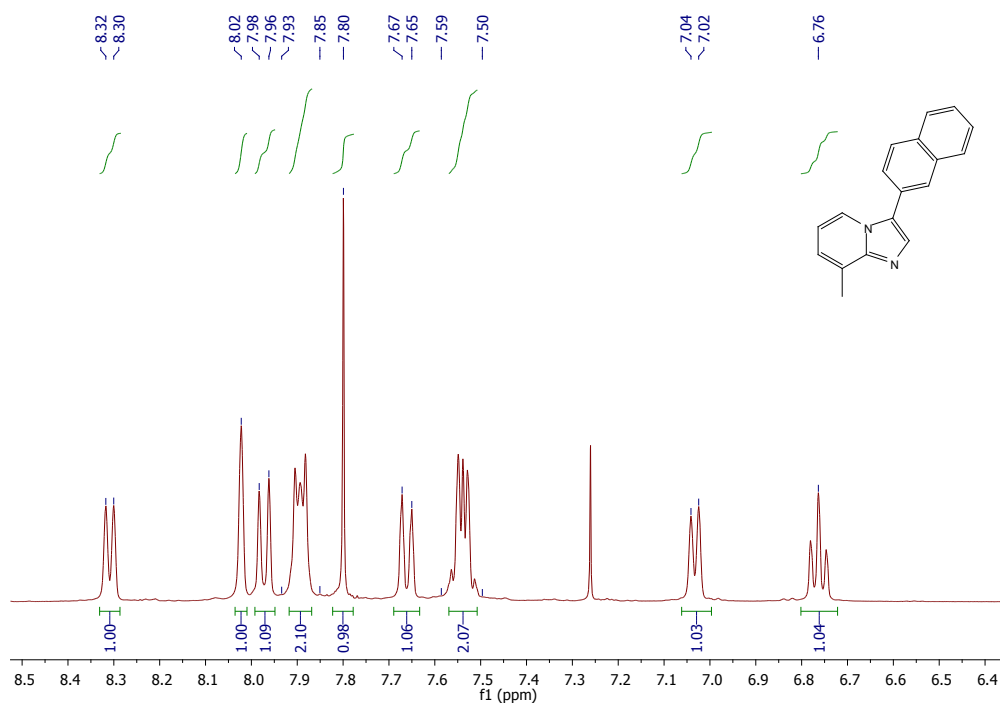

$^1\text{H}$  NMR spectrum of **4f**

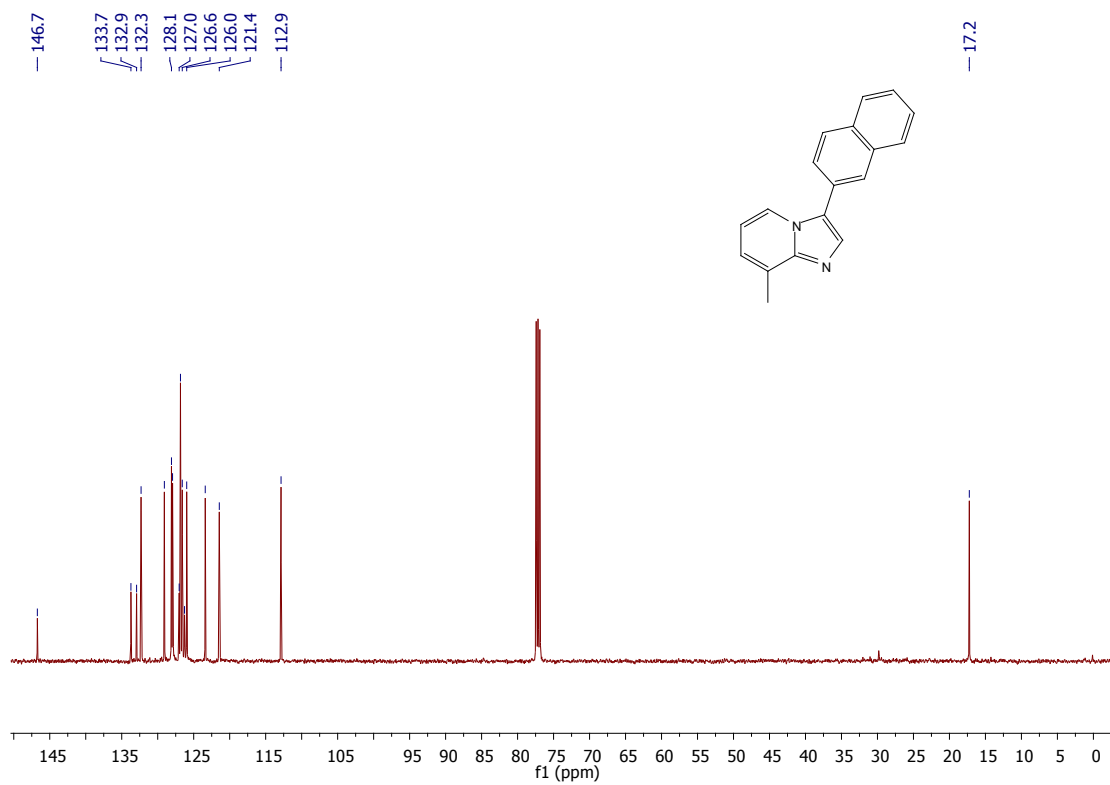

$^{13}\text{C}$  NMR spectrum of **4f**

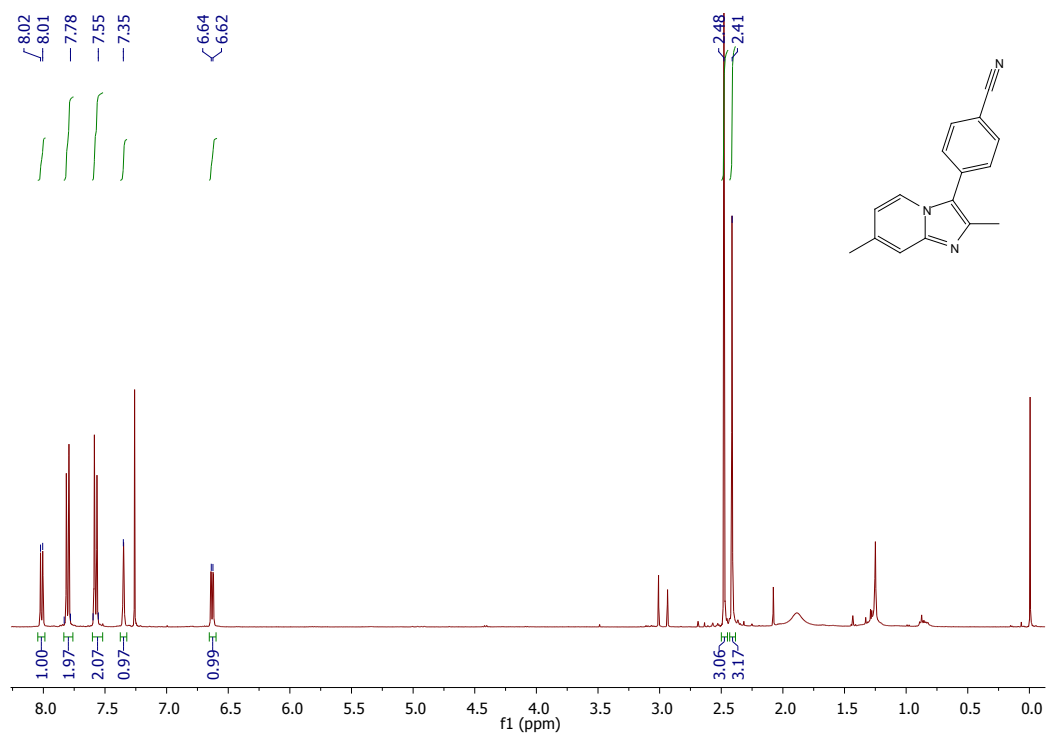

$^1\text{H}$  NMR spectrum of **4g**

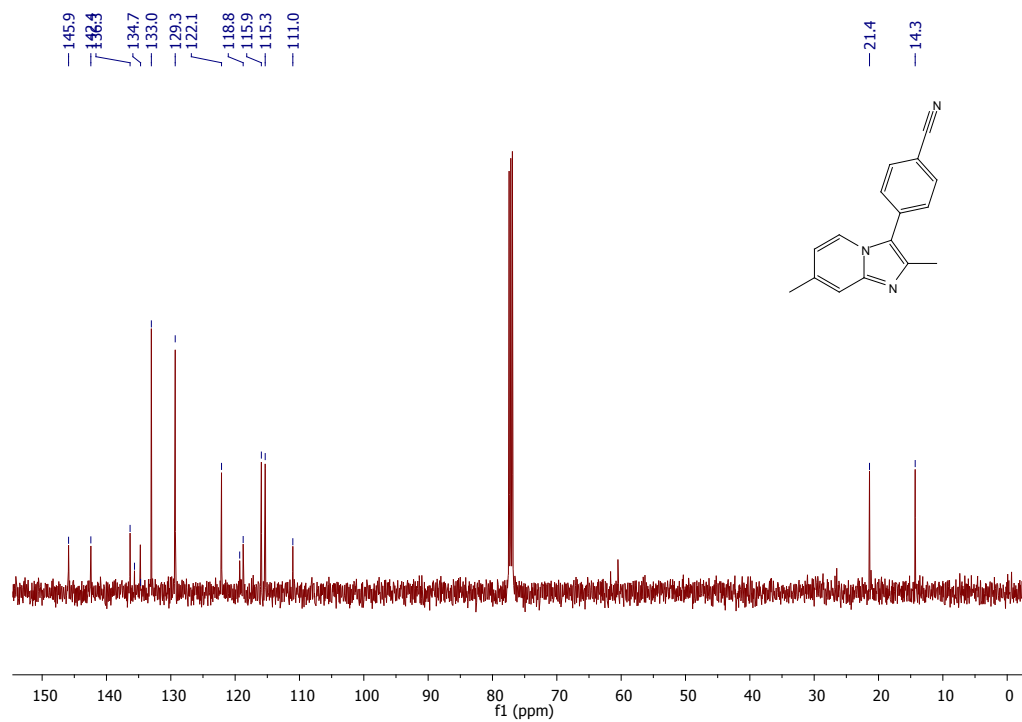

$^{13}\text{C}$  NMR spectrum of **4g**

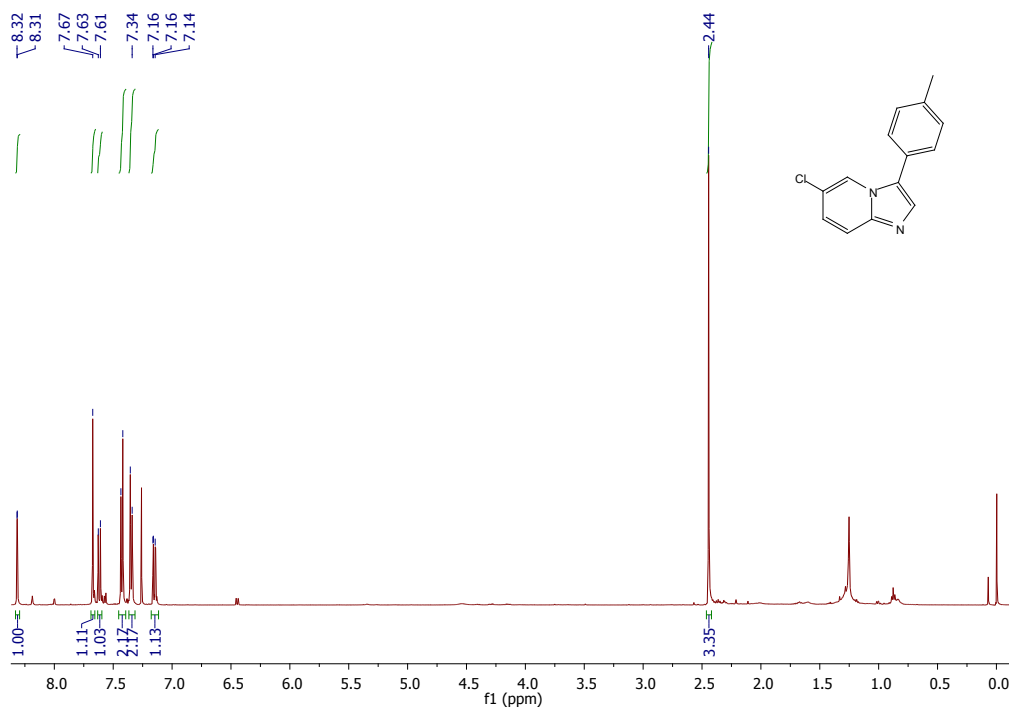

<sup>1</sup>H NMR spectrum of **4h**

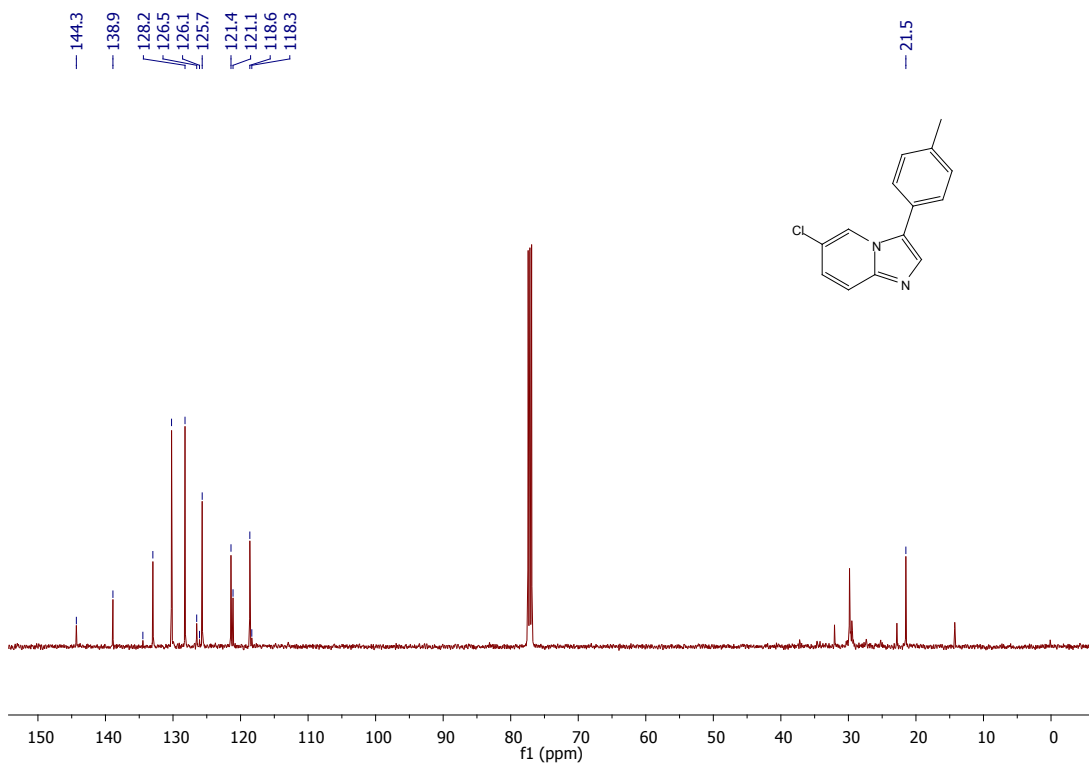

<sup>13</sup>C NMR spectrum of **4h**



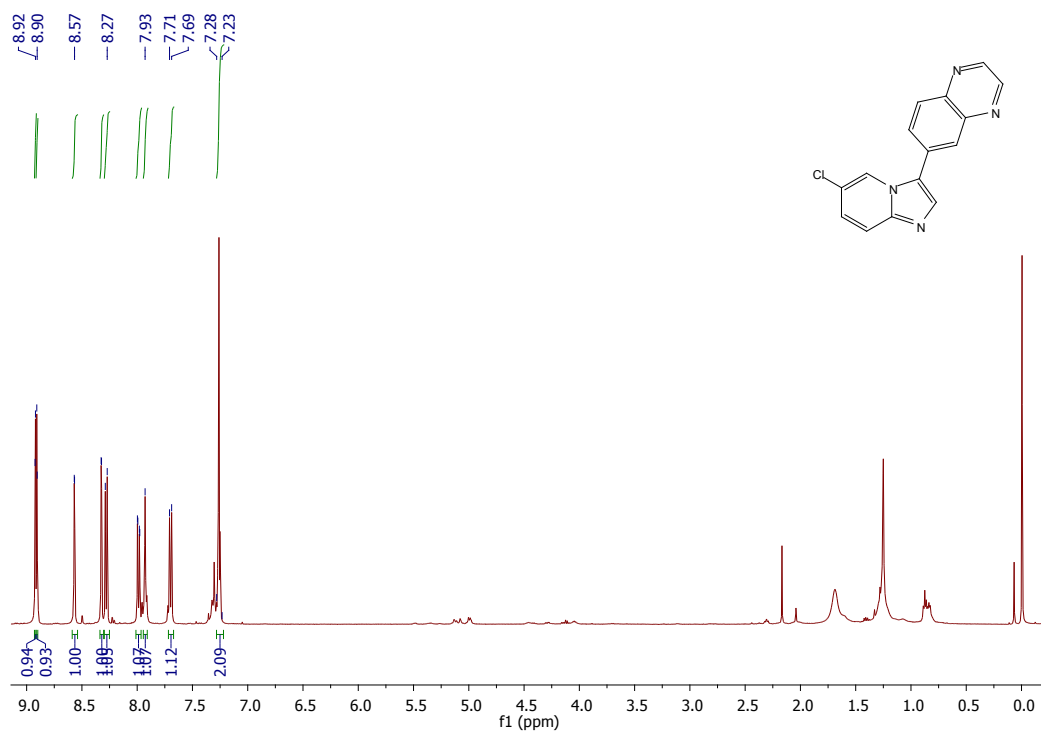

<sup>1</sup>H NMR spectrum of **4i**

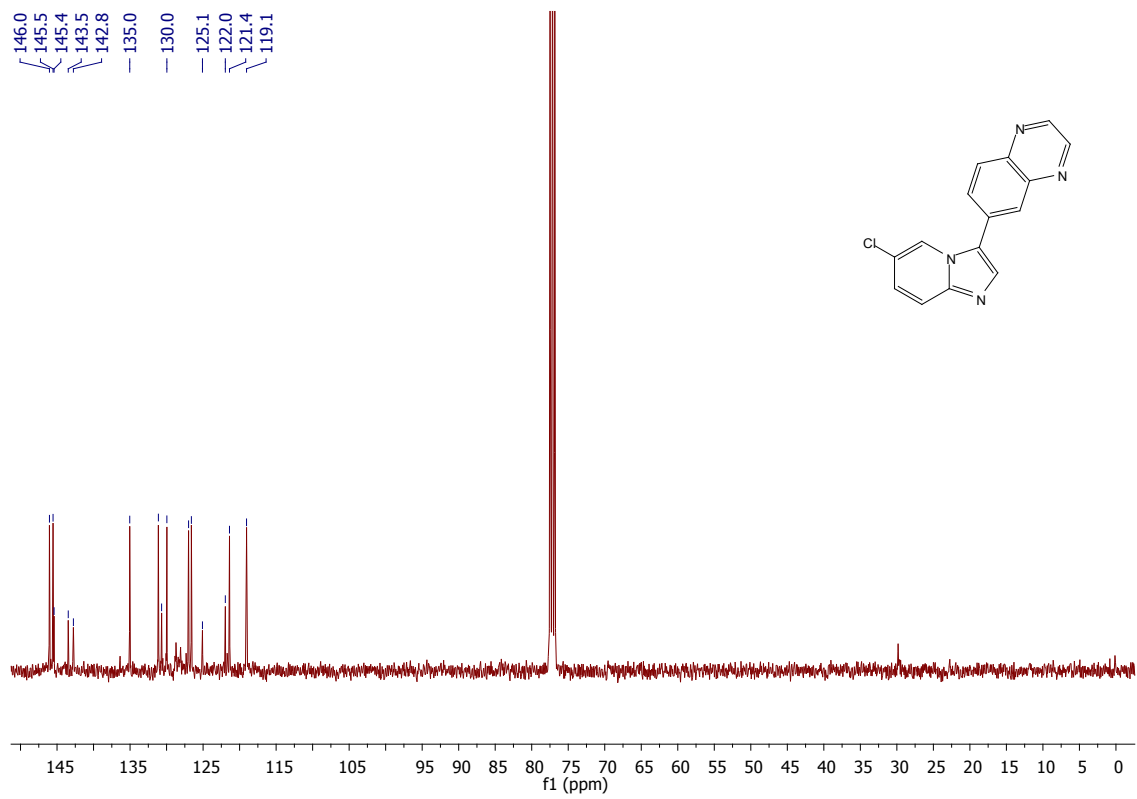

<sup>13</sup>C NMR spectrum of **4i**

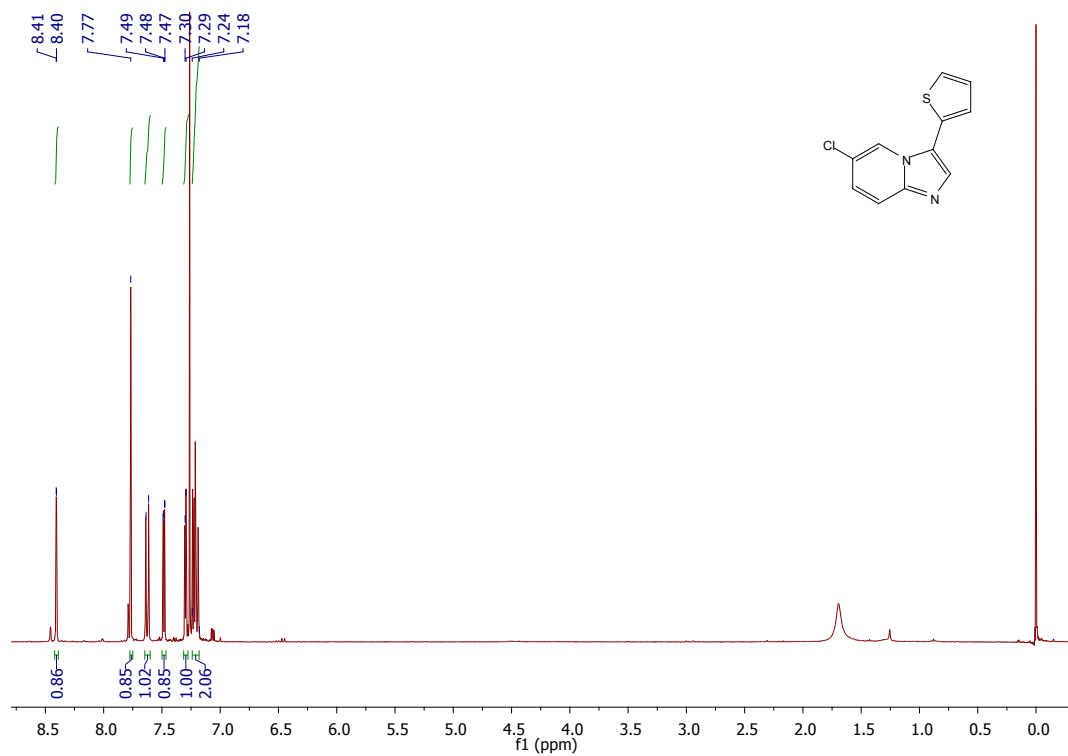

$^1\text{H}$  NMR spectrum of **4j**

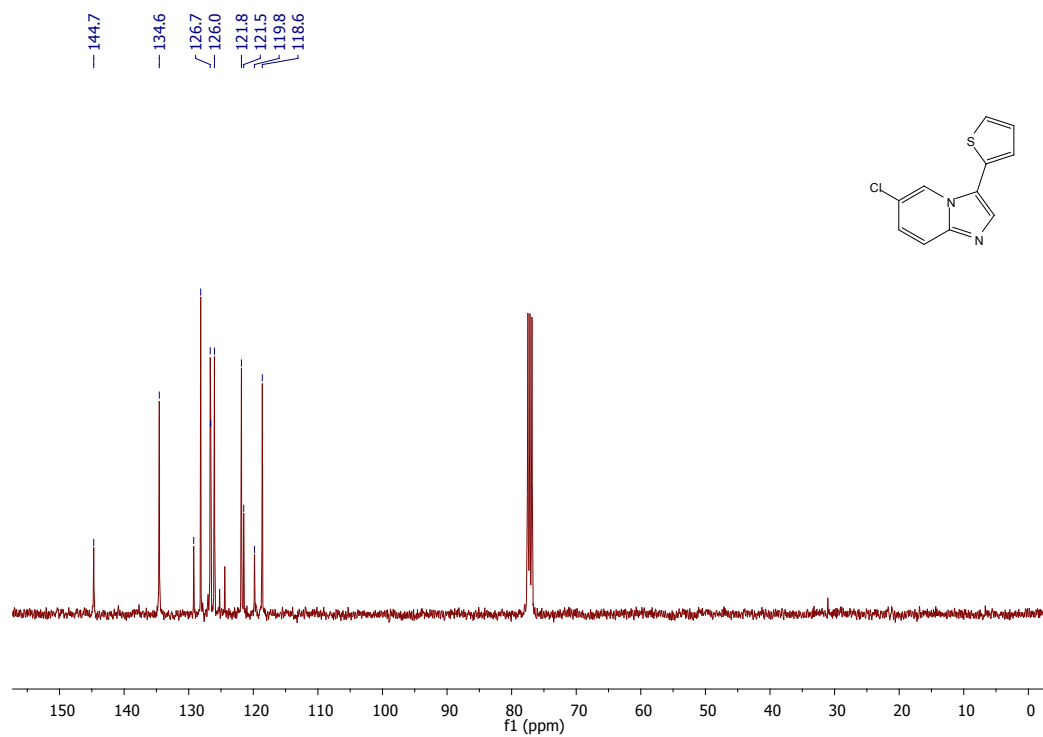

$^{13}\text{C}$  NMR spectrum of **4j**

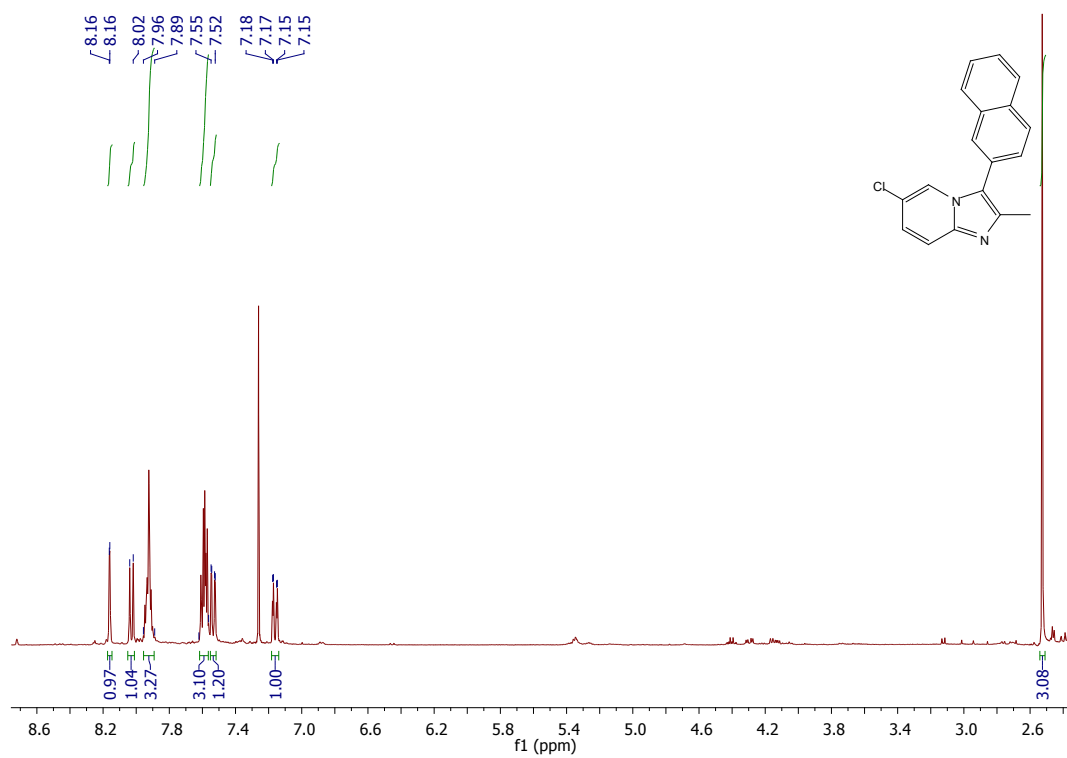

$^1\text{H}$  NMR spectrum of **4k**

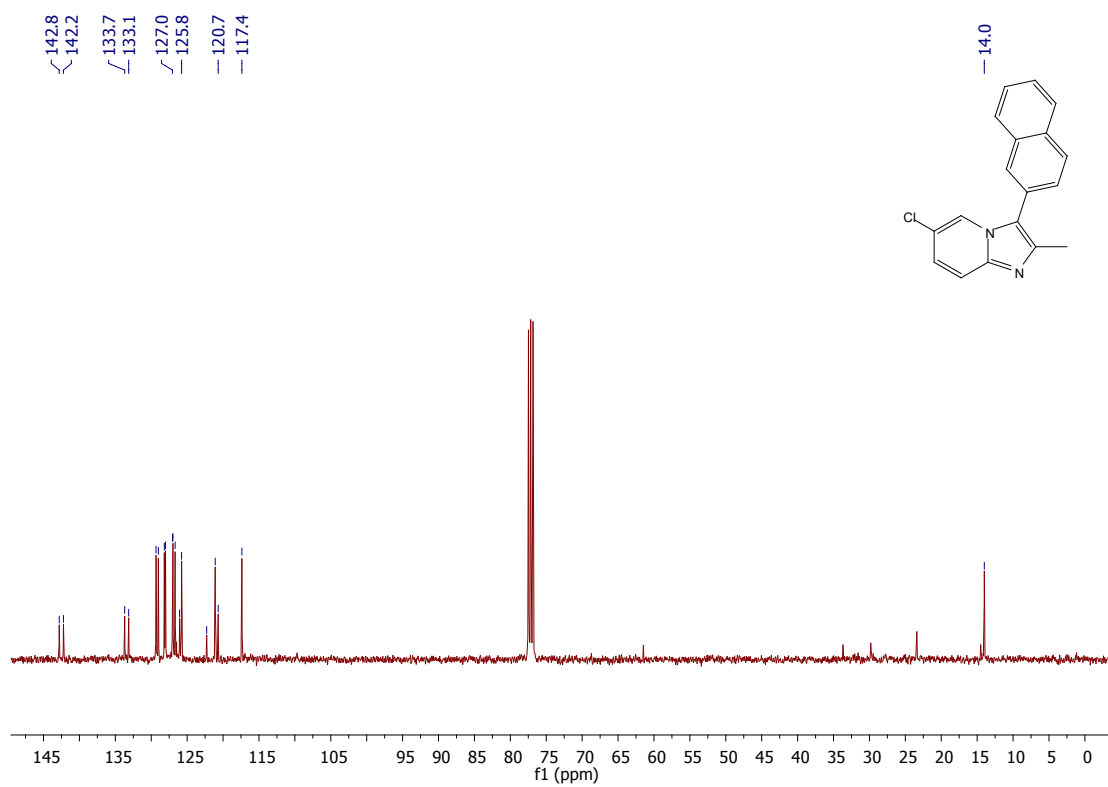

$^{13}\text{C}$  NMR spectrum of **4k**

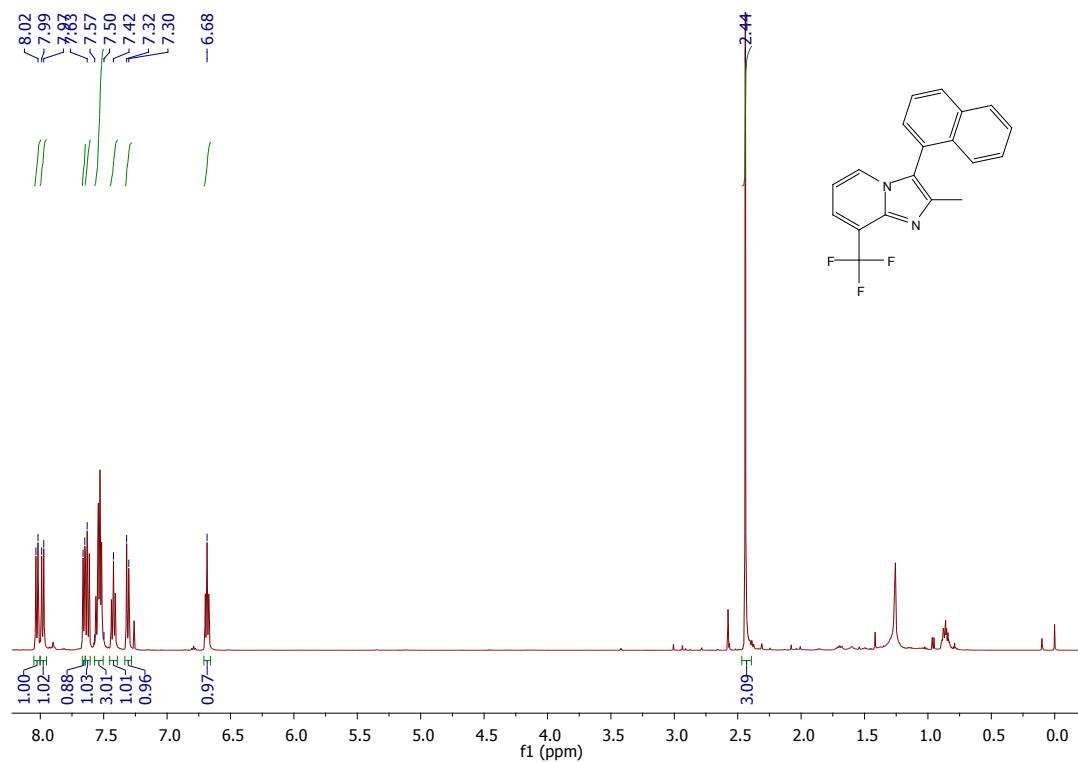

<sup>1</sup>H NMR spectrum of **41**

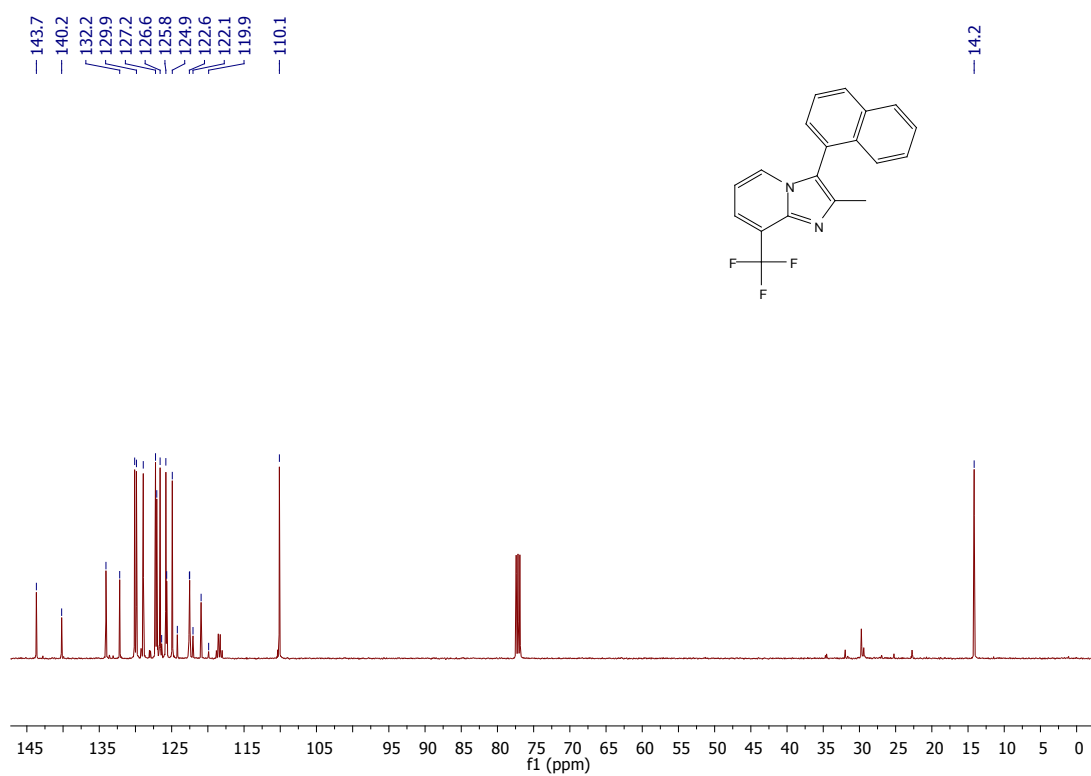

<sup>13</sup>C NMR spectrum of **41**

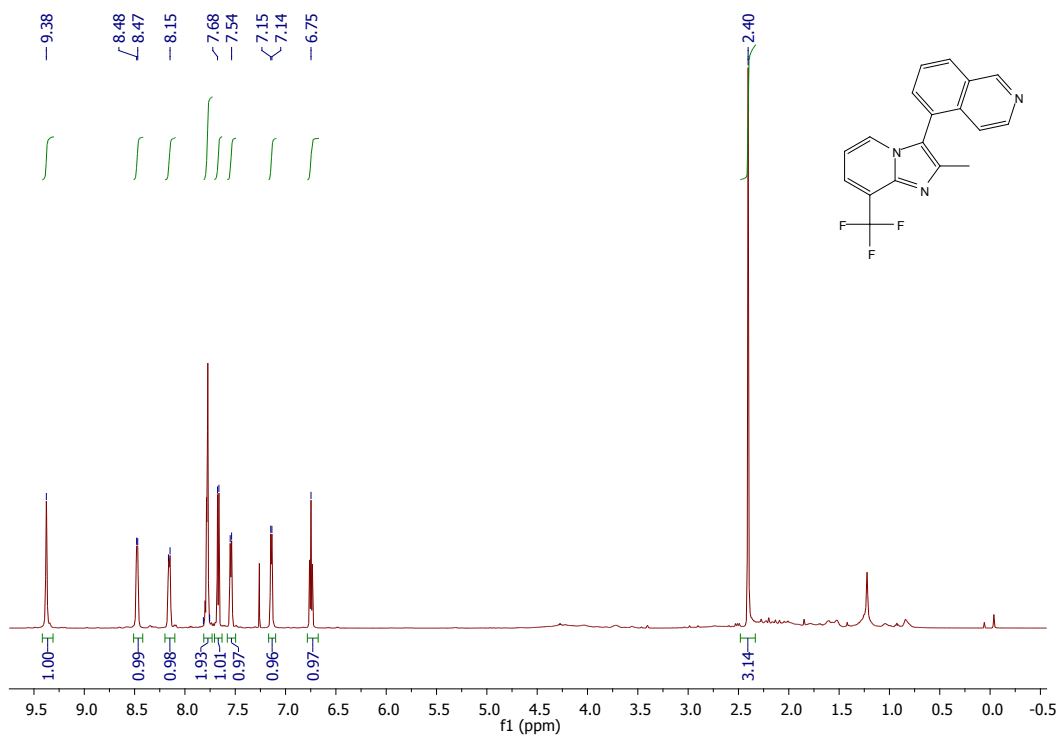

$^1\text{H}$  NMR spectrum of **4m**

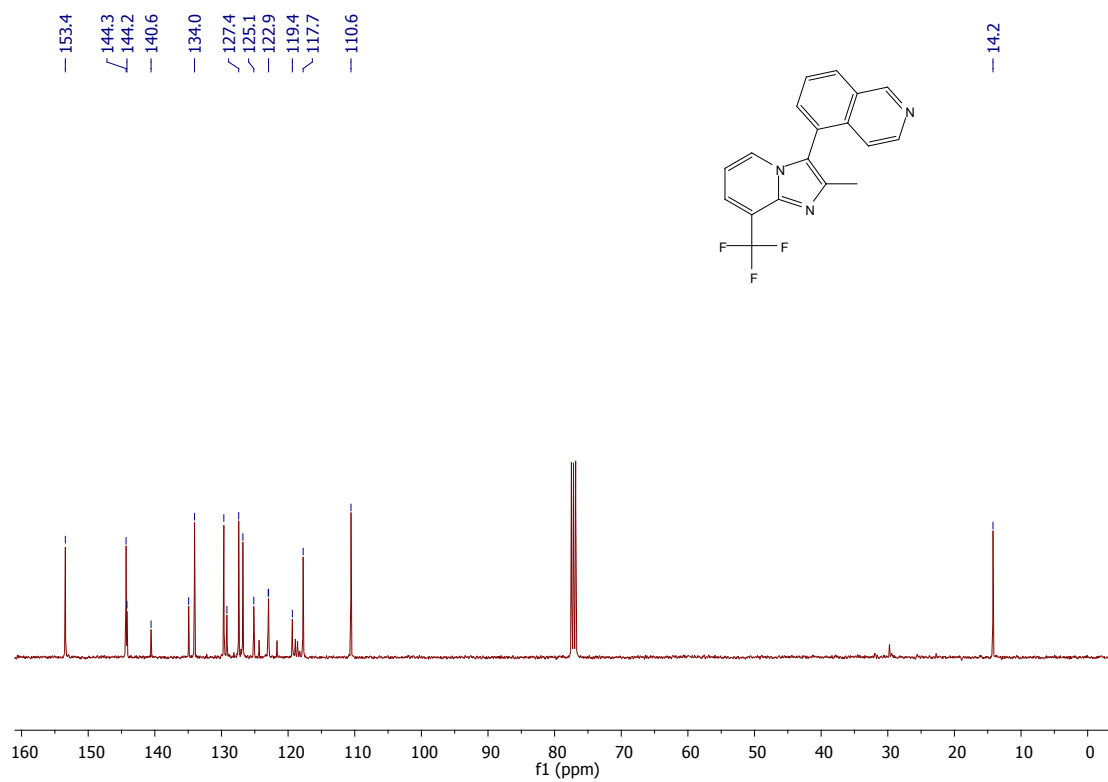

$^{13}\text{C}$  NMR spectrum of **4m**

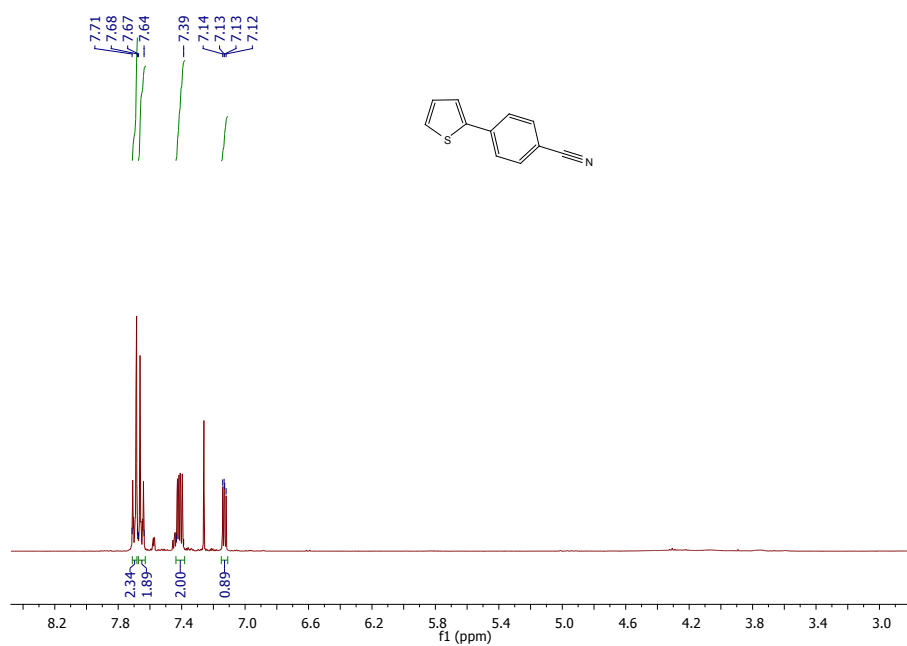

$^1\text{H}$  NMR spectrum of **5a**

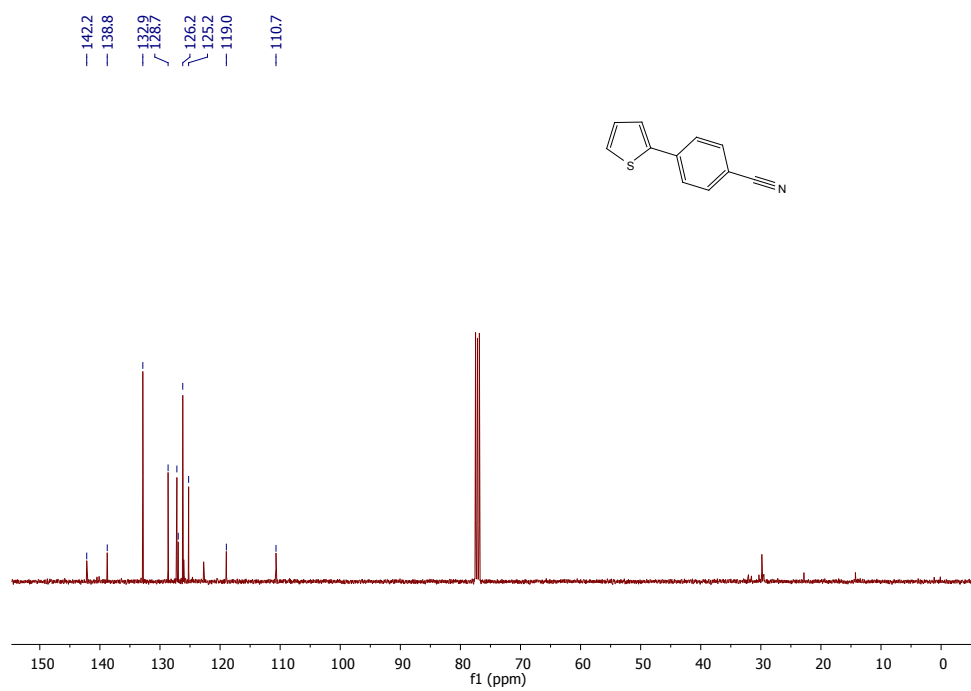

$^{13}\text{C}$  NMR spectrum of **5a**

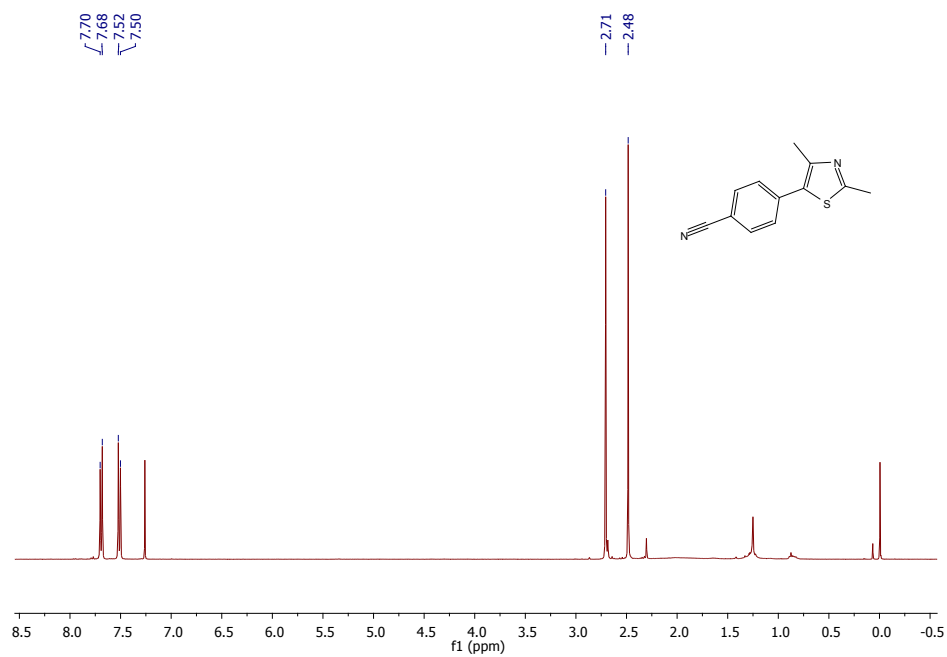

$^1\text{H}$  NMR spectrum of **5b**

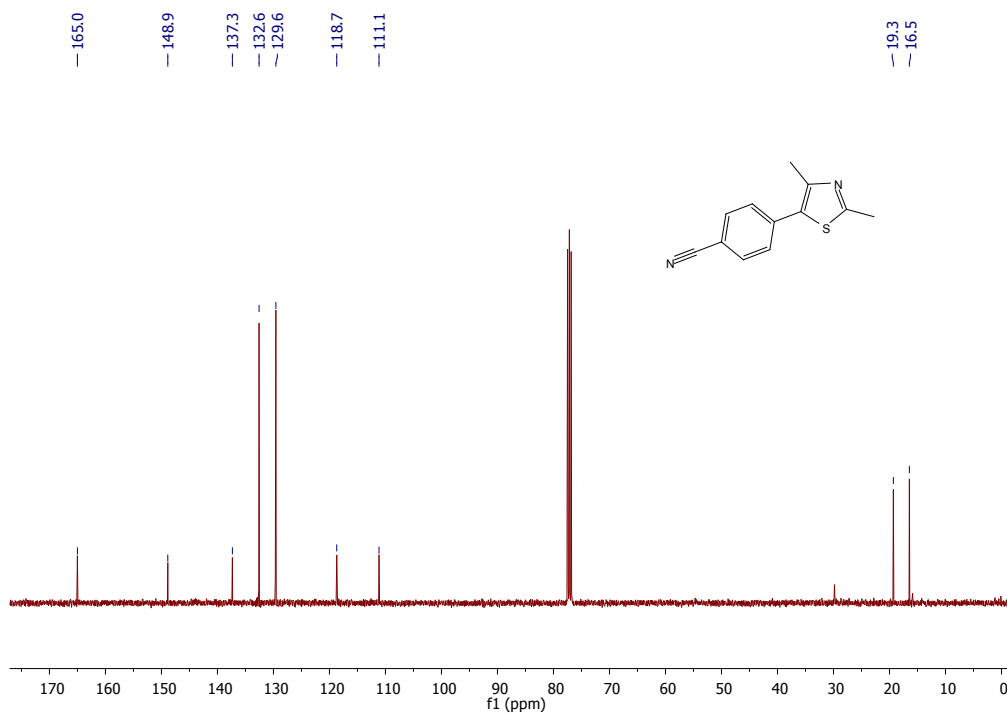

$^{13}\text{C}$  NMR spectrum of **5b**

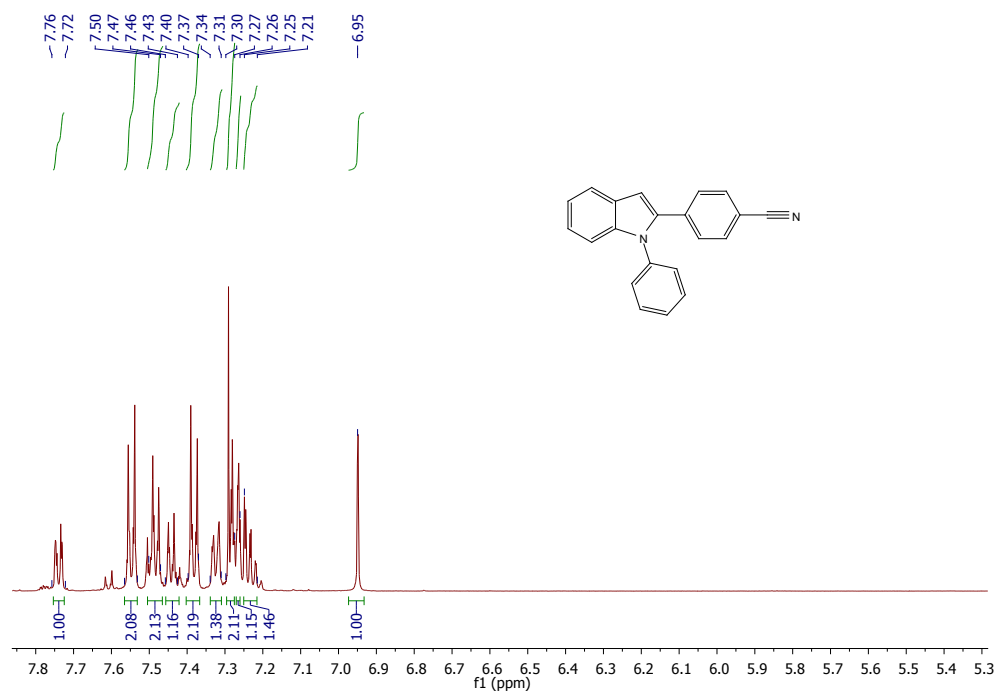

<sup>1</sup>H NMR spectrum of **5c**

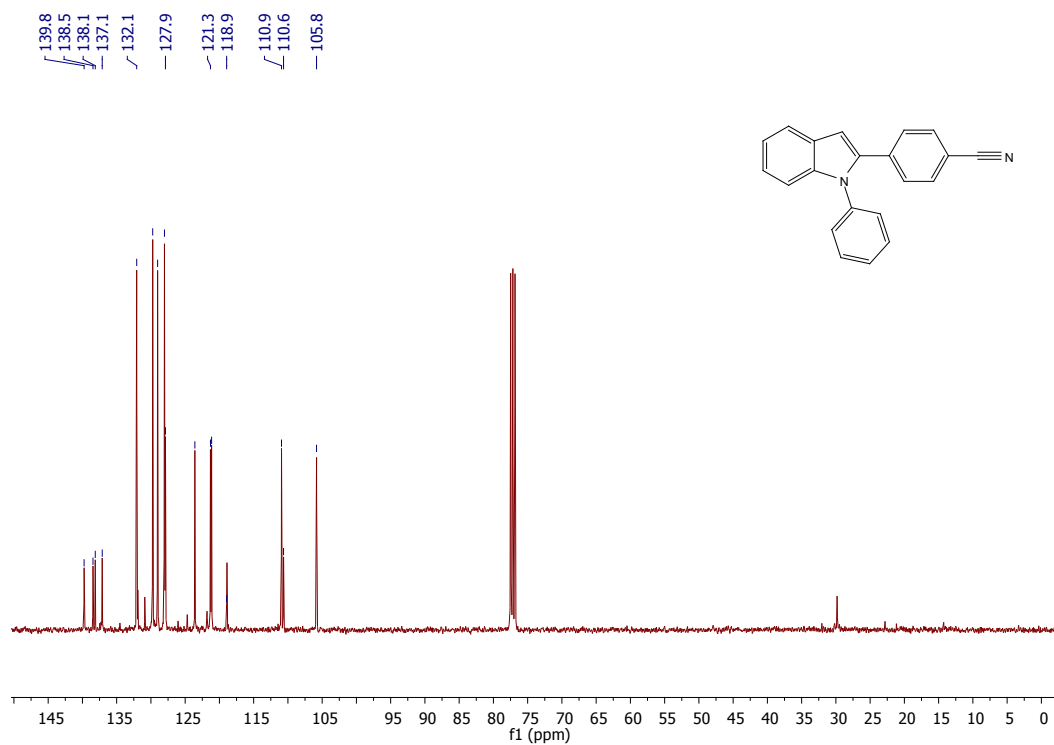

<sup>13</sup>C NMR spectrum of **5c**



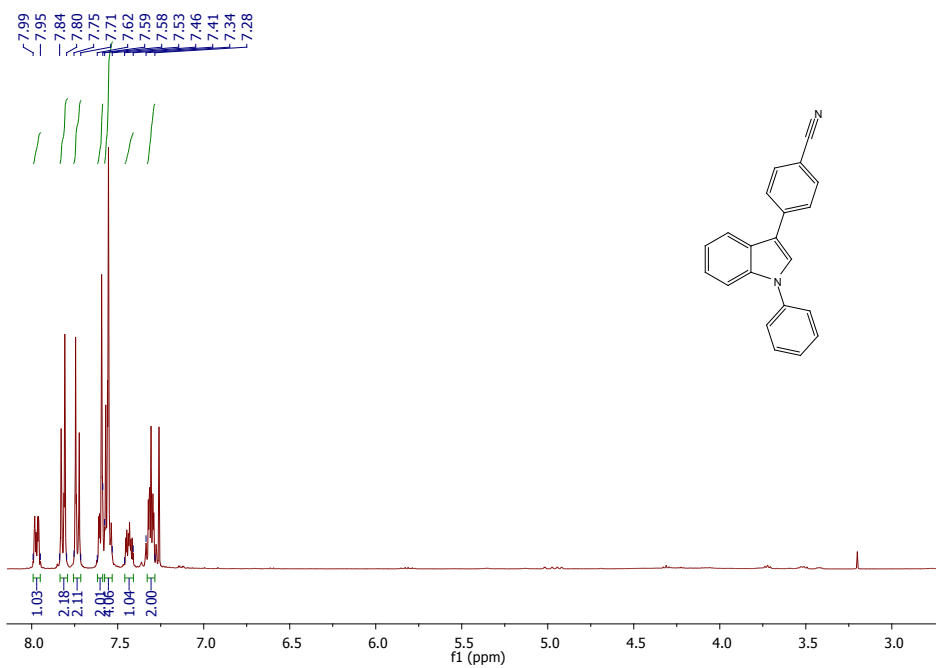

<sup>1</sup>H NMR spectrum of 5c'

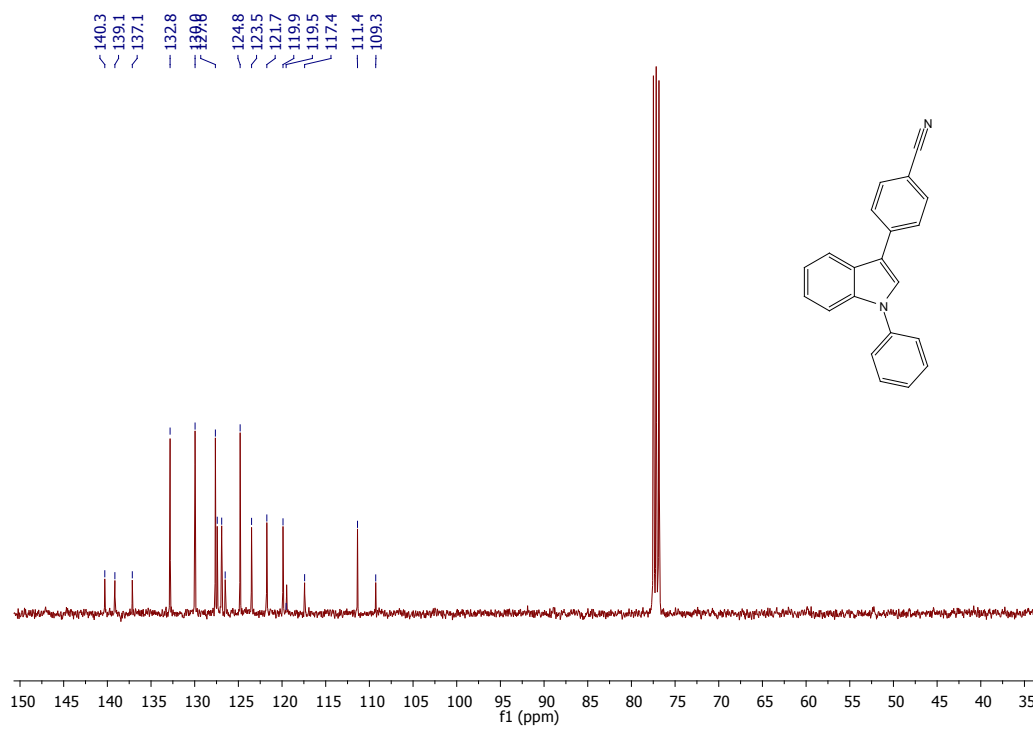

<sup>13</sup>C NMR spectrum of 5c'

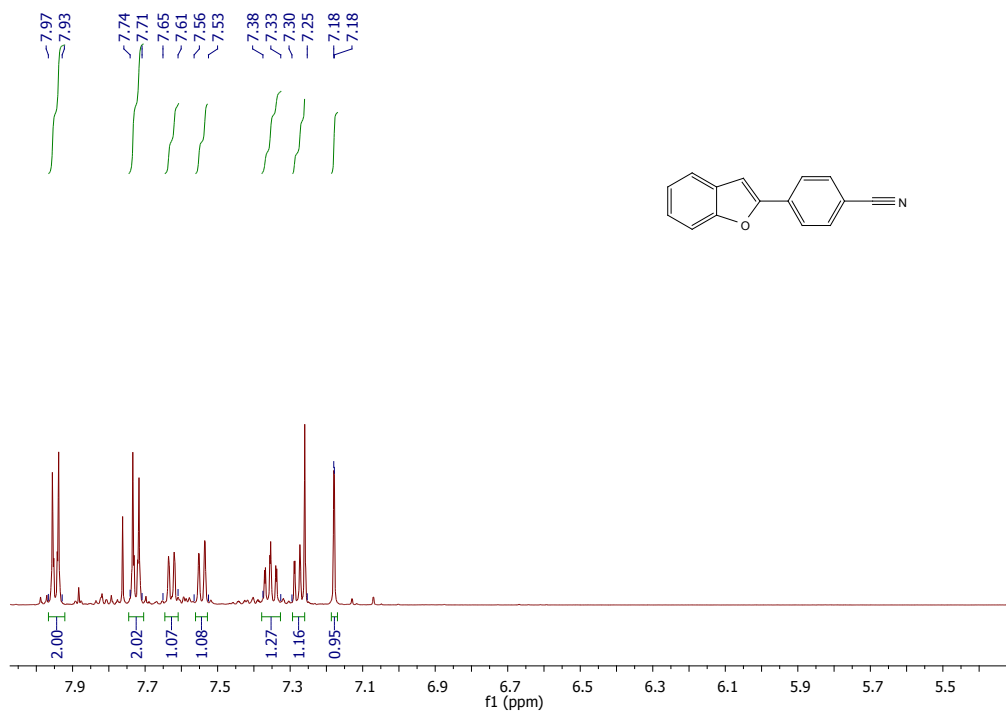

$^1\text{H}$  NMR spectrum of **5d**

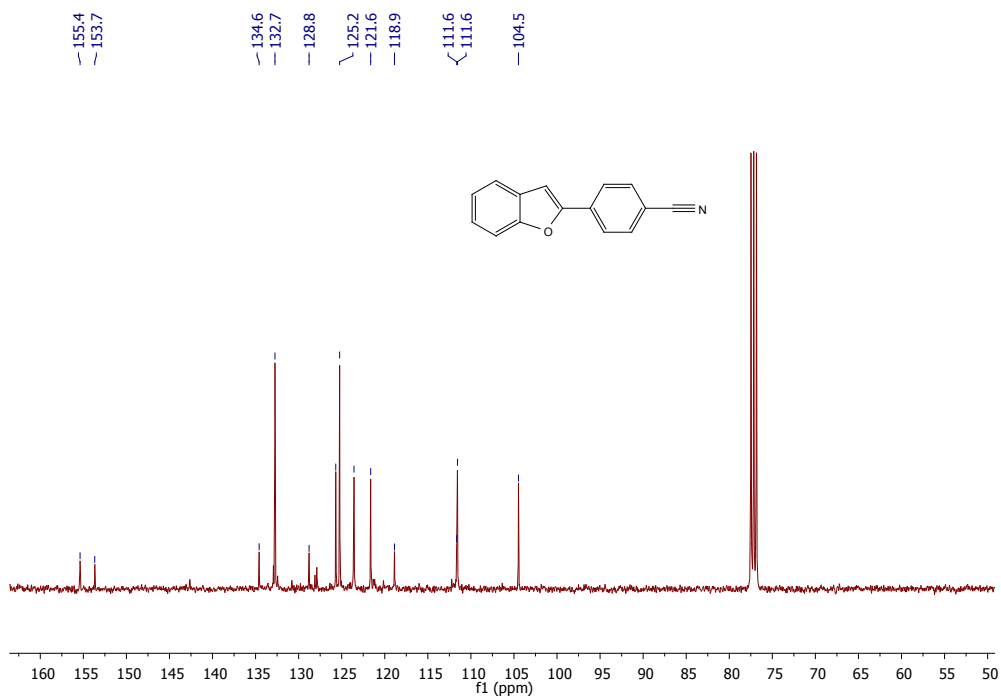

$^{13}\text{C}$  NMR spectrum of **5d**

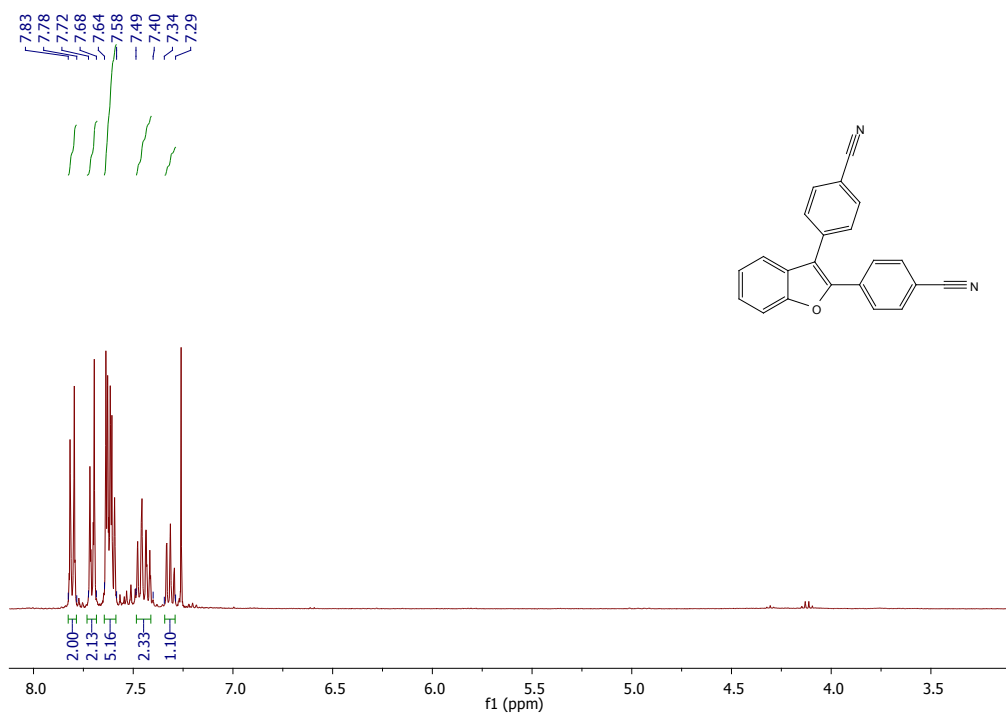

<sup>1</sup>H NMR spectrum of **5d'**

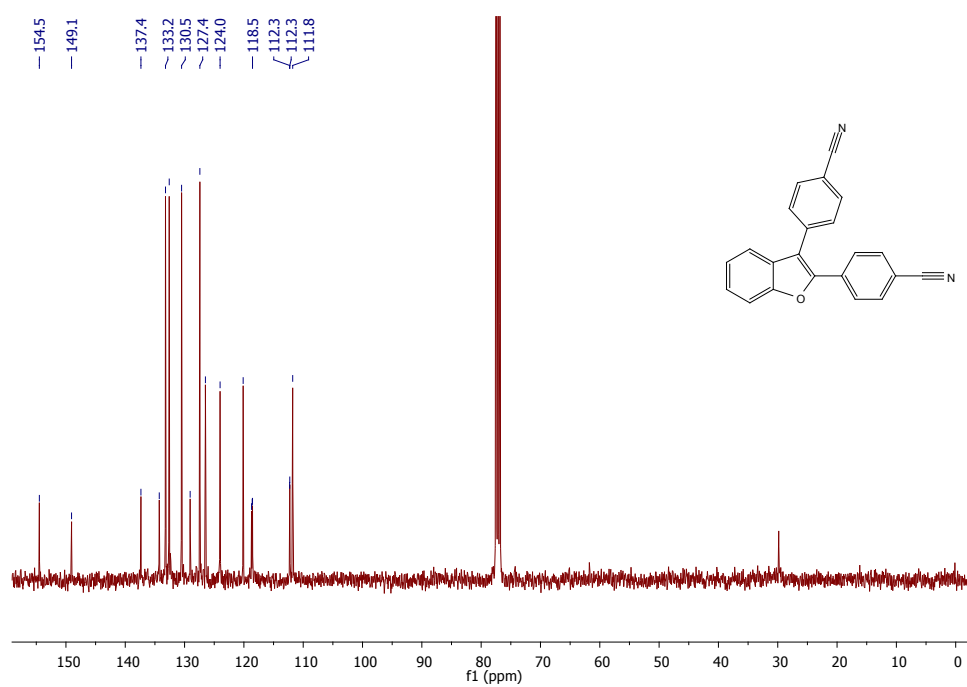

<sup>13</sup>C NMR spectrum of **5d'**

## Antibacterial assay

The screening panel consist of *E. coli* ATCC 25922, *S. aureus* ATCC 29213, *P. aeruginosa* ATCC 27853, *K. pneumoniae* BAA-1705 and *A. baumannii* BAA-1605. The bacterial strains were procured from ATCC (ATCC, Manassas, VA, USA) and Mueller Hinton broth II (MHB II) (Becton Dickinson) was used to propagate the bacteria. The compounds were serially diluted utilizing 2-fold dilutions and bacteria were subsequently added to a final count of 10<sup>4</sup>-10<sup>5</sup> cfu/ml. The 96-well plates were incubated at 37°C for 24 hrs and the antimicrobial activity was determined by visual inspection. The MIC of the active compounds was determined and was defined as the lowest concentration of the compound that inhibited visible growth after 24 hrs.

## References

1. (a)G. C. Moraski, L. D. Markley, P. A. Hipskind, H. Boshoff, S. Cho, S. G. Franzblau and M. J. Miller, *Acs Med Chem Lett*, 2011, 2, 466-470; (b) F. Hongli, L. Xin, L. Xinsheng and C. Jintao, *PCT Chin Appl*, CN 103965190 A, 2014; (c)S. Kang, R. Y. Kim, M. J. Seo, S. Lee, Y. M. Kim, M. Seo, J. J. Seo, Y. Ko, I. Choi, J. Jang, J. Nam, S. Park, H. Kang, H. J. Kim, J. Kim, S. Ahn, K. Pethe, K. Nam, Z. No and J. Kim, *J Med Chem*, 2014, 57, 5293-5305.
2. F. Liang, M. Gibney, V. Yeh, X. Li, V. Molteni, D. Shaw, A. M. Berman, S. Lewis, J. Loren and V. Furminger, *PCT Int Appl*, WO 2013033620 A1, 2013.
